# Supplementary material for: The poly-omics of ageing through individual-based metabolic modelling
Source: BMC Bioinformatics. 2018 Nov 20;19(Suppl 14):415. doi: 10.1186/s12859-018-2383-z (PMC6245500; doi:10.1186/s12859-018-2383-z)
Supplement: Supplementary file 2 — Silhouette values raw data (XLSX 11 kb) [file 12859_2018_2383_MOESM2_ESM.xlsx]

## Sheet: Silhouette
Clusters	AHC T	AHC F	k means T	k means F
2	-0.461211	-0.443491	0.0165507	0.0121141
3	-0.488935	-0.440214	-0.0321746	-0.0325579
4	-0.480082	-0.640483	-0.125104	-0.0485814
5	-0.827432	-0.645441	-0.189617	-0.091202
6	-0.823941	-0.670238	-0.218698	-0.104198
7	-0.853391	-0.680198	-0.181941	-0.164407
8	-0.859062	-0.679671	-0.270161	-0.198593
9	-0.859057	-0.680818	-0.305007	-0.221522
10	-0.86003	-0.730766	-0.210852	-0.206625
11	-0.85986	-0.731221	-0.424993	-0.29121
12	-0.859983	-0.743127	-0.498131	-0.260418
13	-0.906736	-0.74331	-0.364846	-0.271034
14	-0.906559	-0.812561	-0.374038	-0.314778
15	-0.912229	-0.812268	-0.668947	-0.28118
16	-0.912001	-0.811242	-0.64569	-0.280917
17	-0.910927	-0.810295	-0.485094	-0.496012
18	-0.938254	-0.854239	-0.856979	-0.36805
19	-0.938288	-0.879289	-0.89187	-0.646361
20	-0.93954	-0.882064	-0.627757	-0.628434
21	-0.948189	-0.882946	-0.834462	-0.397084
22	-0.948103	-0.883267	-0.758968	-0.434817
23	-0.951922	-0.876367	-0.748599	-0.421444
24	-0.956177	-0.87664	-0.79666	-0.48683
25	-0.956148	-0.876526	-0.90912	-0.336119
26	-0.960005	-0.902275	-0.875503	-0.696486
27	-0.95991	-0.903022	-0.823001	-0.572055
28	-0.959432	-0.90273	-0.882833	-0.594863
29	-0.952306	-0.902727	-0.837566	-0.768562
30	-0.951995	-0.902698	-0.786428	-0.641853
