# Supplementary material for: The poly-omics of ageing through individual-based metabolic modelling
Source: BMC Bioinformatics. 2018 Nov 20;19(Suppl 14):415. doi: 10.1186/s12859-018-2383-z (PMC6245500; doi:10.1186/s12859-018-2383-z)
Supplement: Supplementary file 4 — Supplementary PCA analysis raw data (XLSX 412 kb) [file 12859_2018_2383_MOESM4_ESM.xlsx]

## Sheet: OverallReactionContrib
Reactions	21 and under		Reactions	22-49 years		Reactions	50 and over
ASCBt	100		ASCBt	100		FAS160COA	97.6159
CHSTEROLt2	100		CHSTEROLt2	100		FAS100COA	97.0668
CHSTEROLt3	100		CHSTEROLt3	100		FAS120COA	97.0668
CRNtx	100		CRNtx	100		FAS140COA	97.0668
DMNONCRNt	100		DMNONCRNt	100		OCCOAtx	96.7331
EX_lac_L.e.	100		EX_lac_L.e.	100		CYTK12	94.6786
EX_pyr.e.	100		EX_pyr.e.	100		DCK1n	93.7378
FRDPtc	100		FRDPtc	100		DCK2n	93.7378
FRDPtr	100		FRDPtr	100		CYTK4n	92.9414
GCHOLAte	100		GLACter	100		UMPK5n	92.9414
GLACter	100		GLNLASEer	100		UMPK6n	92.9414
GLNLASEer	100		GLRASE	100		CYTK12n	92.8864
GLRASE	100		GULLACter	100		CYTK14n	92.8864
GULLACter	100		L_LACt2r	100		CYTK3n	92.8864
PE_HSter	100		L_LACt4r	100		CYTK6n	92.8864
PYRt2r	100		PE_HSter	100		CYTK7n	92.8864
RETI1	100		PYRt2r	100		UMPK4n	92.8864
SUCCtp	100		RETI1	100		UMPK7n	92.8864
UROLACer	100		SUCCtp	100		UMPKn	92.8864
RE0830C	100		UROLACer	100		FAOXC8C6x	92.8259
RE1709C	100		RE0830C	100		DNDPt21m	92.6056
RE1901R	100		RE1709C	100		EX_dag_hs.e.	92.5669
RE2079R	100		RE1901R	100		CYTDK1	92.2691
RE2651R	100		RE2079R	100		RNDR3	92.2691
RE2655R	100		RE2651R	100		TRDR	91.8923
RE2658R	100		RE2655R	100		ADPT	91.8369
RE2660C	100		RE2658R	100		ADKd	91.8068
RE3050R	100		RE2660C	100		RNDR1	91.8068
RE3421R	100		RE3050R	100		X3DSPHR	91.7516
RE3524R	100		RE3421R	100		EX_gam.e.	91.7516
C9BRxtc	100		RE3524R	100		GAMt1r	91.7516
LEUPHELAT2tc	100		C9BRxtc	100		HEX10	91.7516
AHCYStd	100		LEUPHELAT2tc	100		SERPT	91.7516
AMETtd	100		AHCYStd	100		r1538	91.7516
CHSTEROLtrc	100		AMETtd	100		r1726	91.7516
FRDPtcr	100		CHSTEROLtrc	100		r1734	91.7516
GCHOLAt	100		FRDPtcr	100		r1798	91.7516
ATP2ter	96.9916		SUCCTD	99.1933		r1949	91.7516
COAtr	96.9916		O2ter	99.1933		DNDPt5m	91.7516
O2ter	96.9916		FAOXC10DCC8DCx	99.1933		RETH1	91.7516
r0936	96.9916		FAOXC12DCC10DCx	99.1933		G6PDA	91.7396
r0937	96.9916		FAOXC14DCC12DCx	99.1933		EX_spc_hs.e.	91.6991
FAOXC10DCC8DCx	96.9916		FAOXC16DCC14DCx	99.1933		SMS	91.6991
FAOXC12DCC10DCx	96.9916		FAOXC16DCr	99.1933		SPC_HSt	91.6991
FAOXC14DCC12DCx	96.9916		FAOXC16OHC16r	99.1933		SPHMDAc	91.6991
FAOXC16DCC14DCx	96.9916		FAOXC6DCC4DCx	99.1933		FAOXC14C12x	90.757
FAOXC16DCr	96.9916		FAOXC8DCC6DCx	99.1933		FAOXC16C14x	90.757
FAOXC16OHC16r	96.9916		FAOXOHC16C16DCc	99.1933		NICRNS	90.6555
FAOXC6DCC4DCx	96.9916		HEXDIACTD	99.1933		NP1	90.6555
FAOXC8DCC6DCx	96.9916		HEXDICOAACBPx	99.1933		THRGLNexR	90.6332
FAOXOHC16C16DCc	96.9916		OMHPALTD	99.1933		r0391	90.6037
HEXDIACTD	96.9916		SUCCOAPET	99.1933		DLNLCGt	90.5002
HEXDICOAACBPx	96.9916		ATP2ter	99.1803		EX_dlnlcg.e.	90.5002
OMHPALTD	96.9916		COAtr	99.1803		DESAT20_1	90.5002
SUCCOAPET	96.9916		r0936	99.1803		FACOAL203	90.5002
SUCCTD	96.9916		r0937	99.1803		r2009	90.479
ADPtx	96.961		FAOXC101C102x	98.9107		ARTPLM2	90.4361
ATPtx	96.961		FAOXC101C8x	98.9107		DHCRD2	90.2365
CO2tp	96.961		FAOXC101x	98.9107		RTOTAL2t	89.7182
DPMVDx	96.961		FAOXC102C101x	98.9107		LPS3	89.7182
MEVK1x	96.961		FAOXC122x	98.9107		DSAT	89.6712
PItx	96.961		FAOXC142C122x	98.9107		GLYK	89.6601
PMEVKx	96.961		FAOXC163C142x	98.9107		ADRNCOAtx	89.6208
r0954	96.961		FAOXC163C164x	98.9107		CDIPTr	89.5256
r0488	96.9394		FAOXC163x	98.9107		EX_pglyc_hs.e.	89.5256
NADPHtxu	96.7514		FAOXC164C163x	98.9107		PGLYCt	89.5256
NADPtxu	96.7514		FAOXC184C163x	98.9107		PGPP_hs	89.5256
RTOTALCRNCPT1	96.6002		FAOXC184x	98.9107		PGPPT	89.5256
RTOTALCRNCPT2	96.6002		FAOXC204C205x	98.9107		CYOOm2	89.4869
RTOTALCRNt	96.6002		FAOXC205C184x	98.9107		RE2675C	88.7954
ARTPLM1m	96.6002		FAOXC225C204x	98.9107		PI4P5K	88.7898
CYOOm2	96.5884		FAOXC225C226x	98.9107		C204CPT2	88.7898
CYOR_u10m	96.4089		FAOXC225x	98.9107		C204CRNt	88.7898
ARACHCPT1	95.9487		FAOXC226C225x	98.9107		EX_man.e.	88.7898
ARACHCPT2	95.9487		FOAXC122C101x	98.9107		FAOXC140	88.7898
ARACHCRNt	95.9487		NADPHtxu	98.8291		FAOXC204	88.7898
FAOXC180	95.9487		NADPtxu	98.8291		HEX4	88.7898
FAOXC200180m	95.9487		ADPtx	98.5261		MAN6PI	88.7898
CHOLtu	95.9245		ATPtx	98.5261		MANt1r	88.7898
EX_chol.e.	95.9245		CO2tp	98.5261		NTD1	88.7898
METS	95.9139		DPMVDx	98.5261		PSDm_hs	88.7898
AHC	95.9139		MEVK1x	98.5261		PSFLIPm	88.7898
METAT	95.9139		PItx	98.5261		r2012	88.7898
EX_pe_hs.e.	95.9138		PMEVKx	98.5261		r2031	88.7898
PEt	95.9138		r0954	98.5261		CYSTLEUrBATtc	88.7898
ARACHt	95.4444		FAOXC180	98.4822		ADRNCPT1	88.7898
RE0577C	95.4444		ARACHCPT1	98.4821		DCSPTN1CPT1	88.7898
EX_arach.e.	95.4444		ARACHCPT2	98.4821		ELAIDCPT1	88.7898
NADtx	95.3387		ARACHCRNt	98.4821		ELAIDCPT2	88.7898
ARTPLM2	95.2506		FAOXC200180m	98.4821		LNLNCACPT1	88.7898
CSm	95.1369		FAOXC102C103x	98.4785		ELAIDCRNt	88.7898
LPS3	95.1123		FAOXC102C81x	98.4785		ADRNCPT2	88.7898
DEDOLP1_L	95.027		FAOXC102x	98.4785		ADRNCRNt	88.7898
DEDOLP2_L	95.027		FAOXC103C102x	98.4785		DCSPTN1CRNt	88.7898
DEDOLR_L	95.027		FAOXC123C102x	98.4785		DCSPTN1CPT2	88.7898
DOLK_L	95.027		FAOXC123x	98.4785		LNLNCACRNt	88.7898
FT	95.027		FAOXC143C123x	98.4785		LNLNCACPT2	88.7898
GGT_L	95.027		FAOXC164C143x	98.4785		FAOXC2252053m	88.7898
IPDPtx	94.9696		FAOXC164C165x	98.4785		FAOXC2051843m	88.7898
AHCYStr	94.9671		FAOXC164x	98.4785		FAOXC18480m	88.7898
AMETr	94.9671		FAOXC165C164x	98.4785		C204CPT1	88.7898
PCHOL_HSter	94.9671		FAOXC184C164x	98.4785		FAOXC1811601m	88.7898
PETOHMr_hs	94.9671		FAOXC61C4x	98.4785		FAOXC183803m	88.7898
PEHSFABPe	94.9671		FAOXC61x	98.4785		FAOXC2242046m	88.7898
STCOAtx	94.773		FAOXC81C61x	98.4785		G3PD2m	88.7898
FAS180COA	94.7429		r0488	98.4777		RIBFLVt3	88.7129
KAS8	94.7429		KAS8	98.4309		RIBFLVte	88.7129
ARTFR202	94.7429		ARACHt	98.3897		r1951	88.6324
ARTFR211	94.7429		RE0577C	98.3897		NADPHtru	87.7485
ARTFR212	94.7429		EX_arach.e.	98.3897		NADPtru	87.7485
ARTFR213	94.7429		RE3000M	97.7833		DESAT18_7	87.7449
FAOXC180x	94.7268		RE3001M	97.7833		ESTRADIOLtr	87.7449
PGPP_hs	94.6564		RE1521M	97.7833		ESTRONEtr	87.7449
PGPPT	94.6564		RE1526M	97.7833		EX_vacc.e.	87.7449
CDIPTr	94.6564		RE1533M	97.7833		FACOAL1812	87.7449
EX_pglyc_hs.e.	94.6564		RE1573M	97.7833		GLCURter	87.7449
PGLYCt	94.6564		RE2999M	97.7833		GULNDer	87.7449
GLYK	94.6161		RE3003M	97.7833		GULNter	87.7449
MDHm	94.5546		RE3004M	97.7833		HSD17B7r	87.7449
NADH2_u10m	94.5185		RE3005M	97.7833		VACCt	87.7449
ASPGLUm	94.3839		RE3006M	97.7833		r2035	87.7449
ASPTAm	94.3839		RE3624M	97.7833		r2400	87.7449
ASPTA	94.3031		CSm	97.6293		r2412	87.7449
MDH	94.2127		CYOOm2	97.6011		FAOXC101m	87.7449
FAOXC101C102x	94.0345		IPDPtx	97.5859		FAOXC121C101m	87.7449
FAOXC101C8x	94.0345		DEDOLP1_L	97.5528		FAOXC141C121m	87.7449
FAOXC101x	94.0345		DEDOLP2_L	97.5528		FAOXC161C141m	87.7449
FAOXC102C101x	94.0345		DEDOLR_L	97.5528		FAOXC181C161m	87.7449
FAOXC122x	94.0345		DOLK_L	97.5528		OCD11COACPT1	87.7449
FAOXC142C122x	94.0345		FT	97.5528		OCD11CRNCACT	87.7449
FAOXC163C142x	94.0345		GGT_L	97.5528		OCD11CRNCPT2	87.7449
FAOXC163C164x	94.0345		ARTPLM2	97.4372		OCT11EFATP	87.7449
FAOXC163x	94.0345		LPS3	97.3571		DUTPDP	87.7449
FAOXC164C163x	94.0345		GLYK	97.3427		PMI1346PH	87.7449
FAOXC184C163x	94.0345		EX_pglyc_hs.e.	97.3377		PMI1346PHn	87.7449
FAOXC184x	94.0345		PGLYCt	97.3377		MI13456Ptn	87.7449
FAOXC204C205x	94.0345		PGPP_hs	97.3377		PPMI1346Ptn	87.7449
FAOXC205C184x	94.0345		PGPPT	97.3377		ATP2ter	87.3497
FAOXC225C204x	94.0345		CDIPTr	97.3377		COAtr	87.3497
FAOXC225C226x	94.0345		C10DCCACT	97.3009		O2ter	87.3497
FAOXC225x	94.0345		C10DCc	97.3009		PPItr	87.3497
FAOXC226C225x	94.0345		SEBACACT	97.3009		r0936	87.3497
FOAXC122C101x	94.0345		SEBACIDTD	97.3009		r0937	87.3497
FUM	93.9313		SEBCOACROT	97.3009		FAOXC10DCC8DCx	87.3497
FUMm	93.797		SEBCOAPET	97.3009		FAOXC12DCC10DCx	87.3497
AKGMALtm	93.3497		CYOR_u10m	97.2517		FAOXC14DCC12DCx	87.3497
DLNLCGt	93.1244		LPS2	97.1964		FAOXC16DCC14DCx	87.3497
EX_dlnlcg.e.	93.1244		CHOLtu	97.0972		FAOXC16DCr	87.3497
DESAT20_1	93.1244		EX_chol.e.	97.0972		FAOXC16OHC16r	87.3497
FACOAL203	93.1244		METS	97.0862		FAOXC6DCC4DCx	87.3497
FAOXC226205x	93.0982		EX_pe_hs.e.	97.0862		FAOXC8DCC6DCx	87.3497
FAOXC102C103x	92.5389		PEt	97.0862		FAOXOHC16C16DCc	87.3497
FAOXC102C81x	92.5389		AHC	97.0862		HEXDIACTD	87.3497
FAOXC102x	92.5389		METAT	97.0862		HEXDICOAACBPx	87.3497
FAOXC103C102x	92.5389		GLYATm	96.9228		OMHPALTD	87.3497
FAOXC123C102x	92.5389		AOBUTDsm	96.9228		SUCCOAPET	87.3497
FAOXC123x	92.5389		AACTtm	96.9228		SUCCTD	87.3497
FAOXC143C123x	92.5389		AACTOOR	96.9228		r1733	87.3247
FAOXC164C143x	92.5389		GLYtm	96.9204		FAOXC101C102x	87.3165
FAOXC164C165x	92.5389		GHMT2r	96.8823		FAOXC101C8x	87.3165
FAOXC164x	92.5389		C204CPT2	96.8751		FAOXC101x	87.3165
FAOXC165C164x	92.5389		C204CRNt	96.8751		FAOXC102C101x	87.3165
FAOXC184C164x	92.5389		FAOXC204	96.8751		FAOXC122x	87.3165
FAOXC61C4x	92.5389		DCSPTN1CPT1	96.8751		FAOXC142C122x	87.3165
FAOXC61x	92.5389		STRDNCCPT1	96.8751		FAOXC163C142x	87.3165
FAOXC81C61x	92.5389		STRDNCCPT2	96.8751		FAOXC163C164x	87.3165
FAOXC14C12x	92.0482		STRDNCCRNt	96.8751		FAOXC163x	87.3165
FAOXC16C14x	92.0482		DCSPTN1CRNt	96.8751		FAOXC164C163x	87.3165
LPS2	91.999		DCSPTN1CPT2	96.8751		FAOXC184C163x	87.3165
ACITL	91.8758		FAOXC2252053m	96.8751		FAOXC184x	87.3165
CYTK12n	91.6135		FAOXC2051843m	96.8751		FAOXC204C205x	87.3165
CYTK14n	91.6135		FAOXC18480m	96.8751		FAOXC205C184x	87.3165
CYTK3n	91.6135		C204CPT1	96.8751		FAOXC225C204x	87.3165
CYTK6n	91.6135		AKGMALtm	96.8707		FAOXC225C226x	87.3165
CYTK7n	91.6135		G6PDH2rer	96.7383		FAOXC225x	87.3165
UMPK4n	91.6135		G6PDH1rer	96.7383		FAOXC226C225x	87.3165
UMPK7n	91.6135		OXAHCOtex	96.7383		FOAXC122C101x	87.3165
UMPKn	91.6135		SO4OXAtex2	96.7383		CYOR_u10m	87.0949
PMTCOAtx	91.394		ASPTA	96.697		GF6PTA	87.0091
ARACHDCOAtx	91.1688		ASPGLUm	96.6505		PDHm	86.9623
EX_lneldc.e.	90.9391		ASPTAm	96.6505		DCSPTN1COAtx	86.9326
FACOAL1822	90.9391		NADH2_u10m	96.4618		DCSPTN1t	86.4109
LNELDCt	90.9391		r0591	96.3626		EX_adrn.e.	86.4109
EX_nrvnc.e.	90.8045		KCCt	96.3626		EX_dcsptn1.e.	86.4109
FACOAL241	90.8045		NaKt	96.3626		FACOAL224	86.4109
NRVNCCOAtx	90.8045		ADPACDAc	96.3626		FACOAL2251	86.4109
FAOXC121x	90.8045		ADPACTD	96.3626		ACACT4p	86.3324
FAOXC141C121x	90.8045		ADPCOACROT	96.3626		r0727	86.3324
FAOXC161C141x	90.8045		ADPCOAPTE	96.3626		r0729	86.3324
FAOXC181C161x	90.8045		C6DCCACT	96.3626		r1445	86.3324
FAOXC201C181x	90.8045		C6DCc	96.3626		EX_gthrd.e.	86.0988
FAOXC221C201x	90.8045		PTPAT	96.3626		ETF	85.481
FAOXC241C221x	90.8045		FAOXC14C12x	96.1711		ETFQO	85.481
ADSK	90.4972		FAOXC16C14x	96.1711		CYSGLTH	84.3276
BPNT	90.4972		ADMDC	96.0352		EX_Lcystin.e.	84.3276
SADT	90.4972		DKMPPD	96.0352		HSD17B1	84.3179
ESTRADIOLt	90.4972		MDRPD	96.0352		NDPK8m	84.3079
ESTRONESt	90.4972		MTAP	96.0352		ARTFR44	84.2654
ESTSULT	90.4972		MTRI	96.0352		EX_idp.e.	84.2205
EX_estradiol.e.	90.4972		SPMS	96.0352		NDP10ex	84.2205
EX_estrones.e.	90.4972		MDH	95.988		EX_imp.e.	84.2205
EX_so4.e.	90.4972		MDHm	95.9632		NADH2_u10m	83.9623
ADMDC	90.3463		FUM	95.8683		FADtm	83.8083
DKMPPD	90.3463		ACITL	95.7789		EX_nrvnc.e.	83.6734
MDRPD	90.3463		PEHSFABPe	95.6936		FACOAL241	83.6734
MTAP	90.3463		PCHOL_HSter	95.6936		NRVNCCOAtx	83.6734
MTRI	90.3463		PETOHMr_hs	95.6936		FAOXC121x	83.6734
SPMS	90.3463		AHCYStr	95.6936		FAOXC141C121x	83.6734
FAOXC16C14m	90.2019		AMETr	95.6936		FAOXC161C141x	83.6734
EX_thym.e.	89.8206		FUMm	95.4519		FAOXC181C161x	83.6734
THYMt	89.8206		H2O2tn	95.2404		FAOXC201C181x	83.6734
TMDPP	89.8206		O2Stn	95.2404		FAOXC221C201x	83.6734
DHFR	89.802		O2tn	95.2404		FAOXC241C221x	83.6734
TMDS	89.8019		SPODMn	95.2404		RE2996X	83.261
NTD5	89.8019		EX_thym.e.	95.0285		RE2985X	83.261
CYTK12	89.6392		THYMt	95.0285		RE2986X	83.261
GHMT2r	89.2037		TMDPP	95.0285		RE2987X	83.261
C226COAtx	89.1812		DHFR	95.0257		RE2988X	83.261
EX_crvnc.e.	89.1214		TMDS	95.0257		RE3002X	83.261
FACOAL226	89.1214		ARACHDCOAtx	94.8331		CYSTGLUex	82.9272
GLYtm	89.0184		EX_dag_hs.e.	94.7648		ARACHCPT1	82.5541
GLYATm	89.0088		FAOXC226205x	94.6775		ARACHCPT2	82.5541
AOBUTDsm	89.0088		NADtx	94.6748		ARACHCRNt	82.5541
AACTtm	89.0088		ACACT5p	94.2951		FAOXC180	82.5541
AACTOOR	89.0088		r0661	94.2951		FAOXC200180m	82.5541
UMPK5n	88.3386		r0723	94.2951		CLPNDCOAtx	82.5124
UMPK6n	88.3386		EX_nrvnc.e.	94.2918		CLPNDt	82.5124
EX_dag_hs.e.	88.1838		FACOAL241	94.2918		DESAT22_2p	82.5124
DPCOAK	88.1506		NRVNCCOAtx	94.2918		EX_CLPND.e.	82.5124
LAPCOAl	88.1506		FAOXC121x	94.2918		FACOAL2252	82.5124
COAtl	88.1506		FAOXC141C121x	94.2918		LGNCCOAtx	82.5124
DPCOAtl	88.1506		FAOXC161C141x	94.2918		EX_lgnc.e.	82.5124
r1150	88.1506		FAOXC181C161x	94.2918		FACOAL240	82.5124
FAOXC8C6x	88.0607		FAOXC201C181x	94.2918		FAOXC200180x	82.5124
ACACT4p	88.0498		FAOXC221C201x	94.2918		FAOXC240200x	82.5124
r0727	88.0498		FAOXC241C221x	94.2918		r1899	82.4745
r0729	88.0498		r1443	94.2561		EX_met_L.e.	82.4731
r1445	88.0498		TALA	94.2291		NADN	82.4731
DCK1n	88.0461		TKT1	94.2291		CYSTS	82.4731
DCK2n	88.0461		TKT2	94.2291		CYSTGL	82.4731
ADRNCOAtx	87.5716		CYTK12n	93.9368		ESTRADIOLt	82.4731
EX_adrn.e.	87.5716		CYTK14n	93.9368		ESTRONESt	82.4731
FACOAL224	87.5716		CYTK3n	93.9368		ESTSULT	82.4731
RE2996X	87.5484		UMPK4n	93.9368		EX_estradiol.e.	82.4731
RE2985X	87.5484		UMPK7n	93.9368		EX_estrones.e.	82.4731
RE2986X	87.5484		UMPKn	93.9368		X4NPHSFte	82.4731
RE2987X	87.5484		ACACT4p	93.8662		X4NPHSULT	82.4731
RE2988X	87.5484		r0727	93.8662		X4NPHte	82.4731
RE3002X	87.5484		r0729	93.8662		EX_4nph.e.	82.4731
DCSPTN1COAtx	87.5212		r1445	93.8662		EX_4nphsf.e.	82.4731
CLPNDCOAtx	87.4573		COAtm	93.8588		EX_so4.e.	82.4731
DESAT22_2p	87.4573		RE2996X	93.7892		TCHOLAte	82.4731
CLPNDt	87.162		RE2985X	93.7892		r2027	82.4731
EX_CLPND.e.	87.162		RE2986X	93.7892		SO4CLtex2	82.4731
FACOAL2252	87.162		RE2987X	93.7892		TCHOLAt	82.4731
DCSPTN1t	87.0605		RE2988X	93.7892		r0584	82.4731
EX_dcsptn1.e.	87.0605		RE3002X	93.7892		ADSK	82.4731
FACOAL2251	87.0605		CRNtim	93.7852		BPNT	82.4731
RE3000M	86.6619		FAOXC101m	93.771		NADS2	82.4731
RE3001M	86.6619		FAOXC121C101m	93.771		SADT	82.4731
RE1521M	86.6619		FAOXC141C121m	93.771		OBDHc	82.4731
RE1526M	86.6619		FAOXC161C141m	93.771		FAOXC226205x	82.4266
RE1533M	86.6619		EX_pnto_R.e.	93.7098		ARACHt	82.3254
RE1573M	86.6619		PNTK	93.7098		RE0577C	82.3254
RE2999M	86.6619		PNTOt5	93.7098		EX_arach.e.	82.3254
RE3003M	86.6619		DPCOAK	93.7098		ACACT1r	82.2296
RE3004M	86.6619		PPNCL3	93.7098		CSm	81.9472
RE3005M	86.6619		PPCDC	93.7098		RE0383C	81.9382
RE3006M	86.6619		C161CPT1	93.6345		ELAIDt	81.8184
RE3624M	86.6619		C161CRNt	93.6345		EX_elaid.e.	81.8184
C4tcx	86.2947		C161CPT2	93.6345		FACOAL1813	81.8184
C4x	86.2947		UMPK6n	93.4985		FTHFCL	81.7221
FAOXC6C4x	86.1677		DSAT	93.3253		X5FTHFt2	81.7221
LNELDCCPT1	86.0312		CYTK6n	93.2719		EX_5fthf.e.	81.7221
LNELDCCRNt	86.0312		EX_sph1p.e.	93.0943		FAOXC12C10m	81.7189
LNELDCCPT2	86.0312		SPH1Pte	93.0943		FAOXC14C12m	81.7189
FAOXC18280m	86.0312		ACGAMK	92.9952		Htr	81.7091
ACACtx	85.8299		AGDC	92.9952		HMGCOASi	81.6688
HMGLx	85.8299		r0908	92.9952		RAI3	81.3515
ACACT5p	85.1194		r0909	92.9952		RDH4	81.3515
r0661	85.1194		PEPCKm	92.9076		RETI3	81.3515
r0723	85.1194		CITtbm	92.9076		FUMm	81.1306
FACOAL204	85.1065		RE2973N	92.8958		ARACHDCOAtx	80.9394
r1443	85.0389		RE2974N	92.8958		FAOXC16C14m	80.9379
O2Stn	84.9587		SPMDOX	92.8817		MDHm	80.7414
H2O2tn	84.9587		RE0691C	92.8817		FUM	80.1526
O2tn	84.9587		RE1897C	92.8817		MALSO4tm	80.1526
SPODMn	84.9587		RE1898C	92.8817		FUMSO4tm	80.1526
ACACt2	84.5184		ADNCYC	92.8468		GUAPRT	79.9477
EX_acac.e.	84.5184		CAMPt	92.8468		GMPR	79.9462
ELAIDt	84.3338		EX_camp.e.	92.8468		MDH	79.8224
EX_elaid.e.	84.3338		FAOXC181C161m	92.7201		FAOXC1811603m	79.8172
FACOAL1813	84.3338		OCD11COACPT1	92.7201		EX_strdnc.e.	79.7764
LNLNCGCPT1	84.2982		OCD11CRNCACT	92.7201		STRDNCt	79.7764
LNLNCGCPT2	84.2982		OCD11CRNCPT2	92.7201		AMETt2m	79.4831
LNLNCGCRNt	84.2982		OCT11EFATP	92.7201		PCFLOPm	79.4831
FAOXC183806m	84.2982		DUDPtn	92.6741		PETOHMm_hs	79.4831
HSD17B1	84.1286		DUMPtn	92.6741		PE_HStm	79.4787
EX_ps_hs.e.	83.5831		DUTPDPn	92.6741		AKGMALtm	79.3147
PSt3	83.5831		NDPK6n	92.6741		ASPTA	79.0145
CYTK4n	83.3569		RTOTAL2CRNCPT1	92.5817		ASPGLUm	79.0119
ENO	83.2806		RTOTAL2CRNCPT2	92.5817		ASPTAm	79.0119
FAOXC18480x	83.1992		RTOTAL2CRNt	92.5817		EX_udp.e.	78.7876
C60CPT1	82.9771		ARTPLM2m	92.5817		NADPHtxu	78.2641
C6COAt	82.9771		EX_so4.e.	92.4364		NADPtxu	78.2641
C6CRNtcx	82.9771		FAOXC16C14m	92.2526		DGULND	78.166
HEXCOAACBP	82.9771		ATPasel	92.163		GULN3D	78.166
FAOXC12C10m	82.7835		EX_ha.e.	92.163		UDPGD	78.0897
FAOXC14C12m	82.7835		GLCAASE8ly	92.163		UDPGNP	78.0897
THFt2	82.7725		GLCAASE9ly	92.163		NADtpu	77.4513
EX_thf.e.	82.7725		GLCURtly	92.163		NADtx	77.4513
EX_5mthf.e.	82.7634		HAtly	92.163		FAOXC80	77.4432
FAOXC2051843x	82.7351		NACHEX27ly	92.163		ILEPHELAT2tc	77.399
X3MOBt2im	82.6129		RPE	92.0613		FMNAT	77.3778
VALTA	82.6129		RE3273C	92.0317		RBFK	77.3778
VALt5m	82.6123		r1885	91.9787		CYTK14	77.1957
VALTAm	82.6123		FAS100COA	91.9562		ACITL	77.1922
ARTPLM3	82.5659		FAS120COA	91.9562		EX_ribflv.e.	77.141
HMGCOASi	82.5466		FAS140COA	91.9562		CHOLtu	77.1187
G5SDym	82.5182		FAOXC12C10m	91.8958		EX_chol.e.	77.1187
GLU5Km	82.5182		FAOXC14C12m	91.8958		PCHOL_HSter	76.5937
HMGCOAtx	82.505		C4tcx	91.8053		PETOHMr_hs	76.5937
ORNDC	82.3896		C4x	91.8053		AHCYStr	76.5937
EX_lnlncg.e.	82.1667		FAOXC6C4x	91.7479		AMETr	76.5937
FACOAL1831	82.1667		CLPNDCOAtx	91.4628		PEHSFABPe	76.5937
LNLNCGt	82.1667		CLPNDt	91.4628		METS	76.4947
NADtpu	81.9273		DESAT22_2p	91.4628		AHC	76.4947
RE2973N	81.8498		EX_CLPND.e.	91.4628		METAT	76.4947
RE2974N	81.8498		FACOAL2252	91.4628		EX_pe_hs.e.	76.4947
FUMSO3tm	81.7545		RE1516M	91.4614		PEt	76.4947
MALSO3tm	81.7545		RE1517M	91.4614		EX_retn.e.	76.2038
NDP7ex	81.6826		RE1522M	91.4614		RETNt	76.2038
SO4CLtex2	81.6609		RE1523M	91.4614		EX_retinol.e.	76.1174
EX_pro_L.e.	81.3366		RE1525M	91.4614		GTHPm	75.9862
ACACT1r	81.2014		RE1531M	91.4614		r0022	75.9862
FAS100COA	80.9845		RE1532M	91.4614		r0130	75.5941
FAS120COA	80.9845		RE0512M	91.4614		ACt2m	75.5491
FAS140COA	80.9845		FACOAL204	91.2614		ACSm	75.5412
SPMDOX	80.9157		CYANt	91.2469		SUCD1m	75.1453
RE0691C	80.9157		CYSTA	91.2469		AKGDm	75.113
RE1897C	80.9157		EX_cyan.e.	91.2469		GLUt2m	74.85
RE1898C	80.9157		EX_tcynt.e.	91.2469		GTHRDt	74.7932
EX_lnlc.e.	80.7422		MCPST	91.2469		r2520	74.7932
LINOFATPtc	80.7422		TCYNTt	91.2469		RADH3	74.6612
EX_lpchol_hs.e.	80.4584		LNELDCCPT1	91.2058		CYTK6	74.5231
FAOXC8C6m	80.4278		LNELDCCRNt	91.2058		EX_leuktrB4.e.	74.1711
GAPD	80.4102		LNELDCCPT2	91.2058		LEUKTRB4t	74.1711
LGNCCOAtx	80.3024		FAOXC18280m	91.2058		LTA4H	74.1711
EX_lgnc.e.	80.3024		PGI	91.0468		SUCOAS1m	74.0947
FACOAL240	80.3024		TAGt	91.0296		IDPtn	74.0553
FAOXC200180x	80.3024		DGAT	91.0288		ITPtn	74.0553
FAOXC240200x	80.3024		LPSe	91.0272		NDPK9	74.0553
r0838	80.2544		EX_fuc_L.e.	90.6862		NDPK9n	74.0553
TALA	80.1912		DCSPTN1COAtx	90.4979		TALA	73.6138
TKT1	80.1912		EX_vacc.e.	90.4708		TKT1	73.6138
TKT2	80.1912		ADRNCOAtx	90.4628		TKT2	73.6138
ALAR	80.0929		EX_adrn.e.	90.4628		EX_cys_L.e.	73.5304
EX_ala_D.e.	80.0929		FACOAL224	90.4628		LYSATB0tc	73.5304
COAtm	79.9835		PSP_L	90.4163		LPSe	73.4142
H2Oter	79.9301		PSERT	90.4163		R_group_phosphotase_3	73.3767
GLCURter	79.8182		PGCD	90.4163		RTOTAL3t	73.3767
GULNDer	79.8182		DLNLCGt	90.4123		DGAT	73.3706
GULNter	79.8182		EX_dlnlcg.e.	90.4123		TAGt	73.3706
NADPHtru	79.8139		DESAT20_1	90.4123		ACTNMO	72.9724
NADPtru	79.8139		FACOAL203	90.4123		ACETONEt2	72.9724
ARTFR44	79.8102		DAGt	90.4099		EX_acetone.e.	72.9724
EX_udp.e.	79.7696		PGM	90.3683		EX_Rtotal2.e.	72.9245
RE0383C	79.7416		C60CPT1	90.3636		NDPK8n	72.7215
ASPCTr	79.6959		C6COAt	90.3636		NDPK7n	72.7215
CBPS	79.6959		C6CRNtcx	90.3636		CYTK9n	72.6117
DHORD9	79.6959		HEXCOAACBP	90.3636		ASCBOX	72.5553
DHORTS	79.6959		FALDtly	90.314		DNDPt42m	72.5014
OMPDC	79.6959		H2O2tly	90.314		HMGCOAtx	72.4796
ORPT	79.6959		MEOHtly	90.314		THRPHELAT2tc	72.4574
ARTCOAL1	79.6749		PRDXl	90.314		CYSATB0tc	72.3473
TAGHSTDe	79.6749		ALCD1	90.3119		r0603	72.2408
CRNtim	79.6737		RTOTAL3t	90.257		DAGt	72.0831
DMATTx	79.6511		R_group_phosphotase_3	90.256		THYOXt	72.0466
GRTTx	79.6511		ESTRADIOLt	90.1704		r2194	72.0466
IPDDIx	79.6511		ESTRONESt	90.1704		PALFATPtc	72.0079
PPItx	79.6511		ESTSULT	90.1704		ACACT10m	71.9655
NACUP	79.5425		EX_estradiol.e.	90.1704		ECOAH9m	71.9655
NACDe	79.5327		EX_estrones.e.	90.1704		HACD9m	71.9655
RE0512M	79.5317		r0085	90.091		OIVD3m	71.9655
RE1516M	79.5317		r0156	90.091		EX_ile_L.e.	71.9655
RE1517M	79.5317		ASPCTr	90.0873		H2Otp	71.7452
RE1522M	79.5317		CBPS	90.0873		NDP3ex	71.6222
RE1523M	79.5317		DHORD9	90.0873		COAtp	71.5882
RE1525M	79.5317		DHORTS	90.0873		ACS2	71.4053
RE1531M	79.5317		OMPDC	90.0873		THFt2	71.2665
RE1532M	79.5317		ORPT	90.0873		EX_thf.e.	71.2665
NTP3e	79.5307		DAGK_hs	90.0866		EX_5mthf.e.	71.2457
EX_gtp.e.	79.5307		DCSPTN1t	90.064		r2046	71.1778
ACACT10m	79.5255		EX_dcsptn1.e.	90.064		ARACHDt2	71.0697
ECOAH9m	79.5255		FACOAL2251	90.064		EX_arachd.e.	71.0697
HACD9m	79.5255		EX_ksi.e.	90.0144		LYStiDF	71.0163
OIVD3m	79.5255		EX_ksi_deg1.e.	90.0144		ATPH1e	70.9393
EX_ile_L.e.	79.5255		FUCASE2e	90.0144		EX_atp.e.	70.9393
FAOXC183806x	79.483		GAPD	89.9211		EX_gdp.e.	70.9393
ADK3	79.4502		PGK	89.9211		r1939	70.9307
RE3273C	79.3572		GLNS	89.8943		NDP7ex	70.8694
r0787	79.2104		ACACt2	89.6659		DHAAt1r	70.8459
EX_sph1p.e.	79.209		EX_acac.e.	89.6659		EX_ascb_L.e.	70.8459
SPH1Pte	79.209		r0787	89.6366		EX_dhdascb.e.	70.8459
DSAT	79.2085		EX_Rtotal.e.	89.6363		ASCBt4	70.8459
GLCter	79.1714		FACOAL161	89.5413		FAOXC18480x	70.7138
PSP_L	79.1391		EX_hdcea.e.	89.5401		DASCBR	70.4125
PSERT	79.1391		HDCEAtr	89.5401		r1666	70.4123
PGCD	79.1391		r1747	89.5377		ACOAD1fm	70.294
RTOT2	78.8921		r1999	89.5377		ECOAH1m	70.294
UNK3	78.8189		r2015	89.5377		HACD1m	70.294
ARTFR13	78.7838		r1778	89.5376		FAOXC183806x	70.1566
EX_gln_L.e.	78.735		TYRPHELAT2tc	89.5343		D_LACt2	70.0087
HEX7	78.5794		ACACtx	89.4342		EX_lac_D.e.	70.0087
EX_man.e.	78.5003		HMGLx	89.4342		ACACT5p	70.0047
HEX4	78.5003		r1488	89.3409		r0661	70.0047
MAN6PI	78.5003		RE3241C	89.3409		r0723	70.0047
MANt1r	78.5003		RE3242C	89.3409		LCADi_D	69.9759
EX_Rtotal.e.	78.4501		RE3243C	89.3409		FBA	69.956
FAOXC101m	78.2913		RE3244C	89.3409		PFK	69.956
FAOXC121C101m	78.2913		NADtpu	89.3212		EX_tag_hs.e.	69.951
FAOXC141C121m	78.2913		ACACT1r	89.2674		C226COAtx	69.9309
FAOXC161C141m	78.2913		EX_spc_hs.e.	89.1888		EX_crvnc.e.	69.9309
C161CPT1	78.2913		SMS	89.1888		FACOAL226	69.9309
C161CRNt	78.2913		SPC_HSt	89.1888		r1443	69.8481
C161CPT2	78.2913		SPHMDAc	89.1888		EX_leuktrE4.e.	69.8184
EX_ksi.e.	78.1869		EX_chtn.e.	89.1882		LEUKTRE4t	69.8184
EX_ksi_deg1.e.	78.1869		r0013	89.1882		r1741	69.6546
FUCASE2e	78.1869		r1374	89.1882		PIt8	69.5597
EX_gal.e.	78.048		r1375	89.1882		XYLTD_Dr	69.5244
GALK	78.048		r2397	89.1365		XYLK	69.5244
GALt1r	78.048		r2413	89.1365		DNDPt62m	69.5217
UDPG4E	78.048		PGLc	89.045		NOS1	69.4464
ARTFR207	78.0197		HMGCOASi	89.0196		NOS2	69.4463
EX_fuc_L.e.	77.9257		VACCCPT1	88.7528		ATPH2e	69.3713
EX_vacc.e.	77.8336		VACCCPT2	88.7528		EX_adp	69.3713
EX_utp.e.	77.6525		VACCCRNt	88.7528		CO2tm	69.2675
NDP8ex	77.6525		FAOXC1811602m	88.7528		ALCD2yf	68.9387
EX_ser_L.e.	77.6515		C8DCc	88.6325		ARTPLM3	68.8287
MMTSADm	77.5972		SBCOAACOTx	88.6325		EX_cit.e.	68.7257
KCCt	77.5569		SUBEACTD	88.6325		r1090	68.7257
NaKt	77.5569		SUBERCACT	88.6325		STRDNCCOAtxc	68.6782
G6PPer	77.3494		SUBERCROT	88.6325		FAOXC2051843x	68.6692
G6Pter	77.3494		SUBERICACT	88.6325		PSP_L	68.3973
NDP3ex	77.26		FACOAL1812	88.5889		PSERT	68.3973
EX_retinol_9_cis.e.	77.1312		VACCt	88.5889		PGCD	68.3973
RETH1e	77.1312		FAOXC18480x	88.583		GTHP	68.3749
EX_gthrd.e.	77.1217		AGPAT1	88.5705		DNDPt28m	68.3384
ASCBt4	76.9747		GPAM_hs	88.5705		r2026	68.2145
ACCOAC	76.9472		HIBDm	88.5522		DESAT18_10	67.7747
GTHRDt	76.732		OIVD2m	88.5522		DCYTt	67.6764
r2520	76.732		ACOAD9m	88.5522		EX_dcyt.e.	67.6764
DAGK_hs	76.719		ECOAH12m	88.5522		ICDHy	67.675
PGK	76.6834		X3HBCOAHLm	88.5522		EX_utp.e.	67.5923
DHAAt1r	76.4127		EX_val_L.e.	88.5522		NDP8ex	67.5923
EX_ascb_L.e.	76.4127		DOLGLCP_Lter	88.5339		NTP3e	67.5923
EX_dhdascb.e.	76.4127		DOLGPP_Ler	88.5339		EX_gtp.e.	67.5923
PI34P4Pn	76.0778		DOLPMT4_Ler	88.5339		NDPK7	67.4154
EX_o2s.e.	75.7606		UDPDOLPT_L	88.5339		ACRNtm	67.3061
O2St	75.7606		ME1m	88.4847		CSNATm	67.3061
NDPK8n	75.6381		r2396	88.4839		EX_ksi.e.	67.2935
EX_spc_hs.e.	75.6356		r2398	88.4833		EX_ksi_deg1.e.	67.2935
SMS	75.6356		DNDPt17m	88.4413		FUCASE2e	67.2935
SPC_HSt	75.6356		GLCter	88.3858		PPM	67.1969
SPHMDAc	75.6356		ORNDC	88.2865		RADH4	67.0564
RE1518M	75.6313		r2047	88.2747		ADNt	66.8634
RE2998M	75.6313		FAOXC8C6x	88.2454		ADA	66.8343
PGI	75.4767		CHOLESTle	88.1764		TYRATB0tc	66.8328
DGULND	75.4637		CHOLESACATc	88.175		TMDK1	66.8328
GULN3D	75.4637		X2MCITt	88.1264		PIK3n	66.8328
UDPGD	75.4392		EX_2mcit.e.	88.1264		r1154	66.8328
UDPGNP	75.4392		MCITS	88.1264		r1155	66.8328
H2Otly	75.417		C226COAtx	88.0415		r1723	66.8328
PI345P5Pn	75.3382		EX_crvnc.e.	88.0415		GLNATB0tc	66.8328
PI45P3Kn	75.3382		FACOAL226	88.0415		THRATB0tc	66.8328
MI145PP	75.3178		EX_cgly.e.	88.0168		VALATB0tc	66.8328
PI45PLC	75.3178		PPM	87.9		AGPAT1	66.8328
MI14PP	75.3178		FBA	87.8412		GPAM_hs	66.8328
MI4PP	75.3178		AMPTASECGe	87.822		ADNt4	66.8328
SBTD_D2	75.1083		G6PPer	87.8019		EX_glyc.e.	66.7911
XYLTD_Dr	74.9882		G6Pter	87.8019		GLYCt	66.7911
XYLK	74.9882		IDPtn	87.7978		NTD5	66.6953
PMI12346PH	74.9848		ITPtn	87.7978		CytOxe.	66.6362
PMI12346PHn	74.9848		NDPK9	87.7978		SOProd	66.6362
MINOHPtn	74.9848		NDPK9n	87.7978		FADH2ETC	66.3669
PPMI12346Ptn	74.9848		RTOTAL3CRNCPT1	87.7829		r1994	66.3511
ARTFR210	74.9848		RTOTAL3CRNCPT2	87.7829		ORNt4m	66.2032
ACGAMK	74.9453		RTOTAL3CRNt	87.7829		ACt2r	66.1747
AGDC	74.9453		ARTPLM3m	87.7829		EX_ac.e.	66.1747
r0908	74.9453		GTHS	87.6216		MECOALm	66.1246
r0909	74.9453		GLUCYS	87.6216		MECOAS1m	66.1246
DAGt	74.9341		FAOXC183806x	87.6049		CITRtm	66.1053
r1955	74.8301		LNLNCGCPT1	87.6005		EX_malt.e.	65.9895
DESAT18_9	74.7426		LNLNCGCPT2	87.6005		MALT	65.9895
r2439	74.7358		LNLNCGCRNt	87.6005		MALTt1r	65.9895
r1822	74.7214		FAOXC183806m	87.6005		SULFOX	65.8931
r1666	74.6519		HMGCOAtx	87.5216		RE3009C	65.754
HIBDm	74.5612		NTP3e	87.42		RPE	65.5451
OIVD2m	74.5612		EX_gtp.e.	87.42		EX_lnlnca.e.	65.1711
ACOAD9m	74.5612		SO4CLtex2	87.3808		FACOAL1832	65.1711
ECOAH12m	74.5612		RE0383C	87.3736		LNLNCAt	65.1711
X3HBCOAHLm	74.5612		NADPHtru	87.2802		FAOXC102C103x	64.9462
EX_val_L.e.	74.5612		NADPtru	87.2802		FAOXC102C81x	64.9462
GCC2am	74.5585		GLCURter	87.2787		FAOXC102x	64.9462
GCC2bim	74.5585		GULNDer	87.2787		FAOXC103C102x	64.9462
GCC2cm	74.5585		GULNter	87.2787		FAOXC123C102x	64.9462
FAOXC10C8m	74.519		CATm	87.2521		FAOXC123x	64.9462
RTOTAL3t	74.5054		EX_s2l2fn2m2masn.e.	87.2134		FAOXC143C123x	64.9462
R_group_phosphotase_3	74.4989		EX_s2l2n2m2masn.e.	87.2134		FAOXC164C143x	64.9462
TAGt	74.4987		FUCASEe	87.2134		FAOXC164C165x	64.9462
LPSe	74.4941		EX_retinol_9_cis.e.	87.178		FAOXC164x	64.9462
DGAT	74.4934		RETH1e	87.178		FAOXC165C164x	64.9462
DESAT18_7	74.472		DMATTx	87.1285		FAOXC184C164x	64.9462
FACOAL1812	74.472		GRTTx	87.1285		FAOXC61C4x	64.9462
VACCt	74.472		IPDDIx	87.1285		FAOXC61x	64.9462
PGM	74.4451		PPItx	87.1285		FAOXC81C61x	64.9462
ACOAD10m	74.3868		H2Oter	87.075		HMGCOAtm	64.93
LYStiDF	74.3841		SUCOAS1m	86.9293		r0838	64.8893
GLUt2m	74.2356		EX_lneldc.e.	86.9112		PUNP1	64.8535
r0911	73.9446		FACOAL1822	86.9112		HMGLm	64.7269
PGDI	73.8585		LNELDCt	86.9112		ADK3	64.5855
EX_prostgd2.e.	73.8585		FAOXC2051843x	86.8782		EX_hco3.e.	64.5325
PGS	73.8585		SUCD1m	86.8454		DUTPDPm	64.2655
PROSTGD2t	73.8585		ARTFR43	86.8437		URIDK2m	64.2655
METATB0tc	73.6556		AKGDm	86.8263		EX_fuc_L.e.	64.0939
MTHFR3	73.6062		FAOXC8C6m	86.7495		RE0830N	64.0683
CYANt	73.5619		PFK	86.7368		RE1709N	64.0683
CYSTA	73.5619		NDPK1m	86.6999		RE2660N	64.0683
EX_cyan.e.	73.5619		EX_nac.e.	86.6775		GAPD	64.0444
EX_tcynt.e.	73.5619		r0527	86.6775		PGK	64.0444
MCPST	73.5619		NCAMUP	86.6775		O2Stm	63.9006
TCYNTt	73.5619		GLCMter	86.6752		r0377	63.8213
ALCD1	73.5324		r1786	86.6752		AMPTASECG	63.796
FALDtly	73.5228		RETt	86.6024		r0129	63.796
H2O2tly	73.5228		ITCOAL1m	86.5548		DCMPDA	63.752
MEOHtly	73.5228		ITCOALm	86.5548		ACOAD10m	63.6273
PRDXl	73.5228		FAOXC80	86.5417		RE2973N	63.5724
EX_meoh.e.	73.5051		DTDPtn	86.5383		RE2974N	63.5724
FALDH	73.5051		DTTPtn	86.5383		H2O2tn	63.5697
FTHFL	73.5051		NDPK4n	86.5383		O2Stn	63.5697
MEOHt2	73.5051		MI14PP	86.5139		O2tn	63.5697
SFGTH	73.5051		MI4PP	86.5139		SPODMn	63.5697
GLYCK2	73.4702		RPI	86.4796		MTHFC	63.3711
HPYRRy	73.4702		XOLEST2te	86.4615		THRGLYexR	63.2911
r0160	73.4702		ATPtn	86.4325		EX_lys_L.e.	63.0329
FBA	73.4399		DNADtn	86.4325		BTNDe	63.0329
EX_11_cis_retfa.e.	73.2079		NICRNTtn	86.4325		EX_biocyt.e.	63.0329
EX_9_cis_retfa.e.	73.2079		NNATn	86.4325		EX_btn.e.	63.0329
PFK	73.1635		r0584	86.4325		EX_pi.e.	62.9477
EX_urate.e.	73.125		MECOALm	86.3552		EX_no.e.	62.9283
URATEt	73.125		MECOAS1m	86.3552		NOt	62.9283
r0502	73.125		DCK1n	86.0416		H2CO3D	62.7693
ADNtm	72.9692		DCK2n	86.0416		EX_hdca.e.	62.7524
ADNK1m	72.9692		ACACT10m	86.0388		RE3000M	62.737
DNDPt17m	72.8993		ECOAH9m	86.0388		RE3001M	62.737
P5CRxm	72.86		HACD9m	86.0388		RE1521M	62.737
O2tp	72.8502		OIVD3m	86.0388		RE1526M	62.737
RPE	72.8494		EX_ile_L.e.	86.0388		RE1533M	62.737
r1696	72.7296		EX_lnlncg.e.	86.03		RE1573M	62.737
GLNS	72.6848		FACOAL1831	86.03		RE2999M	62.737
EX_lnlnca.e.	72.4898		LNLNCGt	86.03		RE3003M	62.737
FACOAL1832	72.4898		EX_ocdcea.e.	86.0128		RE3004M	62.737
LNLNCAt	72.4898		EX_lnlc.e.	86.0045		RE3005M	62.737
r0085	72.4186		LINOFATPtc	86.0045		RE3006M	62.737
r0156	72.4186		DIDPtn	85.9863		RE3624M	62.737
X4NPHSFte	72.4124		DITPtn	85.9863		DESAT18_5	62.7368
X4NPHSULT	72.4124		NDPK10	85.9863		RE0583C	62.6649
X4NPHte	72.4124		NDPK10n	85.9863		EX_urate.e.	62.599
EX_4nph.e.	72.4124		RTOTALCRNCPT1	85.9596		URATEt	62.599
EX_4nphsf.e.	72.4124		RTOTALCRNCPT2	85.9596		r0502	62.599
RE1342C	72.3958		RTOTALCRNt	85.9596		EX_h.e.	62.5933
EX_ppa.e.	72.3572		ARTPLM1m	85.9596		MMEm	62.5861
PPAt	72.3572		EX_9_cis_retfa.e.	85.8871		MMCDm	62.5861
CYSTGLUex	72.3365		H2Otly	85.8525		MMMm	62.5452
HXPRT	72.2951		PI34P4Pn	85.8052		H2O2tp	62.3374
G5SADrm	72.2593		LEUATB0tc	85.782		CYANt	62.173
PGLc	72.2314		PHEATB0tc	85.782		CYSTA	62.173
MTHFC	72.085		PGMT	85.7697		EX_cyan.e.	62.173
DESAT18_10	71.9666		GGT6	85.752		EX_tcynt.e.	62.173
EX_lys_L.e.	71.823		PGDI	85.7517		MCPST	62.173
BTNDe	71.823		EX_prostgd2.e.	85.7517		TCYNTt	62.173
EX_biocyt.e.	71.823		PGS	85.7517		ADPtx	62.1627
EX_btn.e.	71.823		PROSTGD2t	85.7517		ATPtx	62.1627
ATPH2e	71.8043		EX_pro_L.e.	85.7493		CO2tp	62.1627
EX_adp	71.8043		LGNCCOAtx	85.7382		DEDOLP1_L	62.1627
ACACT1x	71.6124		EX_lgnc.e.	85.7382		DEDOLP2_L	62.1627
r0463	71.6124		FACOAL240	85.7382		DEDOLR_L	62.1627
SUCD1m	71.5382		FAOXC200180x	85.7382		DMATTx	62.1627
AKGDm	71.5078		FAOXC240200x	85.7382		DOLGLCP_Lter	62.1627
Htx	71.4816		r2401	85.7222		DOLGPP_Ler	62.1627
EX_met_L.e.	71.4532		DIGALSIDEtl	85.6813		DOLK_L	62.1627
CYSTS	71.4532		GALSIDEtl	85.6813		DOLPMT4_Ler	62.1627
CYSTGL	71.4532		GALtly	85.6813		DPMVDx	62.1627
EX_Rtotal3.e.	71.4287		GLAl	85.6813		FT	62.1627
FAOXC16180m	71.4141		RE2666C	85.6813		GGT_L	62.1627
FAOXC181C161m	71.4141		AMPtr	85.6692		GRTTx	62.1627
OCD11COACPT1	71.4141		C4CRNCPT2	85.6248		IPDDIx	62.1627
OCD11CRNCACT	71.4141		C4tmc	85.6248		IPDPtx	62.1627
OCD11CRNCPT2	71.4141		RETHe	85.6149		LYStm	62.1627
OCT11EFATP	71.4141		RETFA	85.6116		MEVK1x	62.1627
PAIL4P_HStn	71.3572		RETFAt	85.6116		PItx	62.1627
SUCOAS1m	71.322		NDP7ex	85.5745		PMEVKx	62.1627
PIter	71.3182		G5SDym	85.5731		PPItx	62.1627
CLOHtex2	71.285		GLU5Km	85.5731		UDPDOLPT_L	62.1627
X5MTHFt2	71.242		EX_retn.e.	85.5653		r0488	62.1627
X5MTHFt	71.2404		RETNt	85.5653		r0954	62.1627
DNDPt13m	71.1325		EX_retinol.e.	85.5422		r2398	62.1627
DURIt	71.089		r2408	85.5203		PMI12346PH	62.1627
EX_duri.e.	71.089		EX_no.e.	85.4913		PMI12346PHn	62.1627
CATm	71.0787		NOt	85.4913		DNDPt14m	62.1627
EX_strdnc.e.	71.0284		ARGSL	85.4913		DNDPt34m	62.1627
STRDNCt	71.0284		ARGSS	85.4913		MINOHPtn	62.1627
EX_idp.e.	70.9703		ALCD21_L	85.4775		PPMI12346Ptn	62.1627
NDP10ex	70.9703		ALCD22_L	85.4775		G6PDH2r	62.1273
EX_imp.e.	70.9703		ALR3	85.4775		G6PDH2c	62.1213
EX_hdcea.e.	70.9081		ALR2	85.4774		ACGAMK	62.005
FACOAL161	70.9081		ATP1ter	85.4533		AGDC	62.005
HDCEAtr	70.9081		BILDGLCURtr	85.4459		r0908	62.005
r1919	70.8959		r0813	85.4459		r0909	62.005
EX_s2l2fn2m2masn.e.	70.8559		BILDGLCURt	85.4459		PGMT	61.9483
EX_s2l2n2m2masn.e.	70.8559		EX_bildglcur.e.	85.4454		FACOAL184	61.7982
FUCASEe	70.8559		GK1	85.4219		GLYCK2	61.6394
Htr	70.759		RNDR2	85.4219		HPYRRy	61.6394
ACTNMO	70.7221		DGK1	85.4219		r0160	61.6394
ACETONEt2	70.7221		NTD8	85.4219		EX_cmp.e.	61.62
EX_acetone.e.	70.7221		ASCBt4	85.2846		NTD4e	61.62
r1778	70.699		DHAAt1r	85.2846		EX_nh4.e.	61.5806
FAOXC16080x	70.699		EX_ascb_L.e.	85.2846		DESAT22_1p	61.5797
RETFAt1	70.6195		EX_dhdascb.e.	85.2846		ACALDtx	61.5324
COAtp	70.5522		GTHRDt	85.2068		CAT2p	61.5324
ATPasel	70.4953		r2520	85.2068		ETOHtx	61.5324
EX_ha.e.	70.4953		G5SADs	85.102		ASPCTr	61.3929
GLCAASE8ly	70.4953		GLU5SAtmc	85.102		CBPS	61.3929
GLCAASE9ly	70.4953		DESAT18_3	85.0859		DHORD9	61.3929
GLCURtly	70.4953		RTOTAL2FATPc	84.9591		DHORTS	61.3929
HAtly	70.4953		EX_5mthf.e.	84.848		OMPDC	61.3929
NACHEX27ly	70.4953		THFt2	84.8463		ORPT	61.3929
ARGATB0tc	70.4201		EX_thf.e.	84.8463		Htm	61.3166
LEUATB0tc	70.4201		ELAIDCPT1	84.82		TTDCAFATPc	61.2889
PHEATB0tc	70.4201		ELAIDCPT2	84.82		ARAB_Lt	60.9665
PIt8	70.0659		ELAIDCRNt	84.82		ARABR	60.9665
OCCOAtx	69.9609		FAOXC1811601m	84.82		EX_arab_L.e.	60.9665
EX_cgly.e.	69.8402		O2tp	84.625		EX_xylt.e.	60.9557
O2tm	69.8268		DHCRD2	84.5874		XYLTt	60.9557
RETFA	69.7247		RAI3	84.5213		r0787	60.8927
RETFAt	69.7247		RDH4	84.5213		EX_sph1p.e.	60.8885
RETHe	69.7233		RETI3	84.5213		SPH1Pte	60.8885
ADNK4	69.6909		ADRNt	84.5157		ADK1	60.8669
r1459	69.6601		FATP6t	84.5141		METtec	60.7747
r1801	69.6219		DOLGLCP_Uter	84.4443		CATm	60.7297
CRNCARtp	69.544		DOLGPP_Uer	84.4443		FACOAL204	60.6829
CSNATp	69.544		DOLPMT4_Uer	84.4443		DNDPt43m	60.6321
NDP8	69.5347		UDPDOLPT_U	84.4443		FAOXC10C8m	60.6005
EX_leuktrB4.e.	69.521		O2Stm	84.3397		EX_s2l2fn2m2masn.e.	60.459
LEUKTRB4t	69.521		XYLUR	84.3094		EX_s2l2n2m2masn.e.	60.459
LTA4H	69.521		ATPS4m	84.293		FUCASEe	60.459
IMPD	69.4081		r0838	84.2278		PUNP5	60.4563
CYTK8n	69.3071		ELAIDt	84.2042		r0321	60.4189
RETt	69.2675		EX_elaid.e.	84.2042		NTD7e	60.378
NTD10	69.2614		FACOAL1813	84.2042		DATPtm	60.3342
PUNP7	69.2614		EX_retinol_cis_11.e.	84.1697		EX_ttdca.e.	60.0014
FAOXC10C8x	69.1835		RETH2e	84.1697		EX_ser_L.e.	59.9514
CSNAT2m	69.1369		MMMm	84.1372		NDPK1m	59.9123
PCRNtm	69.1369		MMEm	84.1154		GHMT2rm	59.894
EX_cytd.e.	69.0708		MMCDm	84.1154		r1435	59.894
RTOTAL2FATPc	69.0559		METATB0tc	84.1109		GTHDH	59.7232
FAS160COA	69.0339		GUAPRT	84.1101		CITtam	59.6533
LDH_L	68.9603		DURIK1	84.0504		r2040	59.5179
L_LACDcm	68.9603		EX_meoh.e.	84.0288		EX_o2s.e.	59.4914
RE3272N	68.9452		FALDH	84.0288		O2St	59.4914
NDPK1m	68.7705		FTHFL	84.0288		THYMDtm	59.4641
PPM	68.6725		MEOHt2	84.0288		r0145	59.4437
EX_o2.e.	68.6671		SFGTH	84.0288		CRNrtx	59.4219
O2t	68.6671		H2Otn	84.022		FAOXC161802m	59.2882
DESAT18_6	68.651		ABTD	84.0177		r0310	59.2882
C4CRNCPT2	68.5747		ABTti	84.0153		ACACt2	59.1706
C4tmc	68.5747		EX_abt.e.	84.0153		EX_acac.e.	59.1706
NTD2e	68.4834		EX_11_cis_retfa.e.	83.9551		EX_meoh.e.	59.0683
EX_gdp.e.	68.4672		ARTPLM3	83.8757		FALDH	59.0683
TRDR	68.4501		EX_leuktrA4.e.	83.8474		FTHFL	59.0683
MTHFCm	68.4004		LEUKTRA4t	83.8474		MEOHt2	59.0683
X10FTHFtm	68.4004		EX_ps_hs.e.	83.8102		SFGTH	59.0683
THFtm	68.4004		PSt3	83.8102		ETOHMO	59.0518
NTD7e	68.3216		ACACT1x	83.7614		CHOLESTTDe	58.9951
DHCRD2	68.298		r0463	83.7614		DCYTD	58.9784
CSNATr	68.1715		LNLCCPT1	83.7552		ALAR	58.9594
EX_glyc.e.	68.0887		LNLCCRNt	83.7552		EX_ala_D.e.	58.9594
GLYCt	68.0887		LNLCCPT2	83.7552		EX_chtn.e.	58.9197
r2397	68.0565		FAOXC182806m	83.7552		r0013	58.9197
TRIOK	67.9618		CSNATr	83.7203		r1374	58.9197
KHK	67.9618		HSD17B1	83.6709		r1375	58.9197
FBA2	67.9618		NRVNCt	83.6632		EX_Rtotal3.e.	58.7563
ITCOAL1m	67.9594		FATP9t	83.6626		NADtn	58.676
ITCOALm	67.9594		XYLTD_Dr	83.4429		NMNATn	58.676
NCAMUP	67.9295		XYLK	83.4429		NMNtn	58.676
EX_nac.e.	67.9295		X4NPHSFte	83.4267		GTHO	58.4319
r0527	67.9295		X4NPHSULT	83.4267		NDPK4	58.3059
X2MCITt	67.8608		X4NPHte	83.4267		r2387	58.286
EX_2mcit.e.	67.8608		EX_4nph.e.	83.4267		RE1447N	58.2094
MCITS	67.8608		EX_4nphsf.e.	83.4267		RE1448N	58.1611
PGMT	67.7835		EX_utp.e.	83.4116		RE2954C	58.158
ACOAD1fm	67.6814		NDP8ex	83.4116		CTPtn	58.129
ECOAH1m	67.6814		NTD12	83.3944		AK2LGCHOLt	58.1217
HACD1m	67.6814		NTPP10	83.3944		EX_ak2lgchol_hs.e.	58.1217
X2DR1PP	67.6335		COAtp	83.2742		EX_paf_hs.e.	58.1217
DRIBt	67.6335		ENO	83.228		PAFt	58.1217
EX_drib.e.	67.6335		UDPGD	83.2065		ACONT	58.0258
CytOxe.	67.5972		UDPGNP	83.2065		PYK	57.9936
SOProd	67.5972		DGULND	83.2018		ORNt3m	57.9359
PPA	67.5855		GULN3D	83.2018		O2tm	57.8123
SERDGLNexR	67.5706		THYOXt	83.1347		DNDPt57m	57.6669
SERDGLYexR	67.5706		r2194	83.1347		EX_pchol_hs.e.	57.4984
CYTD	67.5551		DESAT18_10	83.13		C4tcx	57.4978
PPAn	67.5297		GLUt2m	83.0798		C4x	57.4978
ALCD21_L	67.4172		CRNCARtp	83.0466		NTD2e	57.4407
ALCD22_L	67.4172		CSNATp	83.0466		DESAT18_3	57.3954
ALR3	67.4172		ADK3	83.0417		ACACt2m	57.3906
DCYTt	67.41		GHMT2rm	83.0308		EX_ocdcea.e.	57.3359
EX_dcyt.e.	67.41		r1435	83.0308		RE3245C	57.3359
ALR2	67.4092		EX_lnlnca.e.	82.9979		ACONTm	57.3115
r1291	67.2819		FACOAL1832	82.9979		PYRt2m	57.2999
DCYTD	67.2605		LNLNCAt	82.9979		MGSA2	57.25
r2018	67.169		ARGATB0tc	82.9534		DURIK1	57.2246
OBDHc	67.1112		PMTCOAtx	82.9029		TYRPHELAT2tc	57.2038
MECOALm	67.0725		MTHFC	82.8768		MTHFCm	57.1424
MECOAS1m	67.0725		OCCOAtx	82.7284		X10FTHFtm	57.1424
EX_chtn.e.	66.9965		DURIPP	82.6372		THFtm	57.1424
r0013	66.9965		PI345P5Pn	82.5456		XYLUR	56.9906
r1374	66.9965		PI45P3Kn	82.5456		GLYtm	56.9711
r1375	66.9965		NADHtru	82.5414		SERGLYexR	56.9536
RE1519M	66.9953		NADtru	82.5414		RE1518M	56.9111
RE3626M	66.9953		RE1448N	82.5166		RE2998M	56.9111
DOLGLCP_Lter	66.8565		LYSATB0tc	82.4476		NTD9e	56.8831
DOLGPP_Ler	66.8565		VALATB0tc	82.4476		FAOXC6C4x	56.8817
DOLPMT4_Ler	66.8565		RE1520M	82.4283		CRNtim	56.8764
UDPDOLPT_L	66.8565		RE1527M	82.4283		GLYATm	56.8494
NTD6	66.7521		RE1534M	82.4283		AOBUTDsm	56.8494
ADKd	66.7521		Htr	82.4199		AACTtm	56.8494
RNDR1	66.7521		NDP3ex	82.406		AACTOOR	56.8494
EX_retfa.e.	66.7184		D_LACt2	82.3437		GHMT2r	56.7019
FOLt2	66.5985		EX_lac_D.e.	82.3437		GND	56.5051
FOLTle	66.5985		EX_man.e.	82.2118		ARTFR11	56.4932
DURIK1	66.5787		HEX4	82.2118		r0652	56.3302
RPI	66.5666		MAN6PI	82.2118		r1449	56.3302
CYSGLTH	66.5208		MANt1r	82.2118		NDPK8	56.3247
EX_Lcystin.e.	66.5208		PCFLOPm	82.111		PGLc	56.321
NICRNS	66.4226		PETOHMm_hs	82.111		CATp	56.2397
r0391	66.421		AMETt2m	82.111		ITCOAL1m	56.2347
NP1	66.4189		PE_HStm	82.111		ITCOALm	56.2347
EX_hdca.e.	66.3576		CRNrtx	82.1051		PEPCKm	56.0516
FAOXC2252053x	66.2835		IMPD	81.982		CITtbm	56.0516
EX_hco3.e.	66.1665		CSNAT2m	81.9789		C60CPT1	56.001
ADEt	66.1535		PCRNtm	81.9789		C6COAt	56.001
EX_ade.e.	66.1535		RE3009C	81.8822		C6CRNtcx	56.001
GPDDA1	66.1219		SULFOX	81.8822		HEXCOAACBP	56.001
LPASE	66.1219		NTD10	81.8652		ALADGLYexR	55.8287
EX_Rtotal2.e.	65.8127		PUNP7	81.8652		ALADGLNexR	55.8205
EX_pi.e.	65.7561		ADSK	81.8415		RNMK	55.6156
AMPTASECGe	65.6591		BPNT	81.8415		PNP	55.6156
GGT6	65.6294		SADT	81.8415		X3HCO3_NAt	55.6118
DTDPtn	65.5743		RE1447N	81.8231		URIK1	55.6091
DTTPtn	65.5743		NDPK2n	81.7243		DUDPtn	55.596
NDPK4n	65.5743		RE3627M	81.6467		DUMPtn	55.596
XYLUR	65.5331		RE3628M	81.6467		DUTPDPn	55.596
IDPtn	65.4365		LPCHOLt	81.5776		NDPK6n	55.596
ITPtn	65.4365		EX_leuktrC4.e.	81.5232		r1459	55.596
NDPK9	65.4365		LTC4CP	81.5232		SBTR	55.5955
NDPK9n	65.4365		LEUKTRC4t	81.5232		r1702	55.5955
STRDNCCOAtxc	65.4314		EX_lys_L.e.	81.5153		r1792	55.5955
H2O2tp	65.412		BTNDe	81.5153		r2036	55.5955
EX_ocdcea.e.	65.3949		EX_biocyt.e.	81.5153		NACHORCTL3le	55.5955
RE3245C	65.3949		EX_btn.e.	81.5153		r1673	55.5846
LALDO	65.3936		EX_urate.e.	81.4105		NACDe	55.5818
DCMPDA	65.3372		URATEt	81.4105		LGTHL	55.47
DASCBR	65.3285		r0502	81.4105		LALDO	55.4499
LYSATB0tc	65.2568		PAIL45P_HStn	81.291		OCDCAtr	55.3685
VALATB0tc	65.2568		MTHFCm	81.246		r1464	55.3048
ILETA	65.2399		X10FTHFtm	81.246		GUAD	55.2882
X3MOPt2im	65.2399		THFtm	81.246		r1050	55.22
ILETAm	65.2161		GLYCK2	81.1783		RE1530M	55.1926
ILEt5m	65.2161		HPYRRy	81.1783		CYSPHELAT2tc	55.1501
DESAT18_3	65.1934		r0160	81.1783		ADPRDP	55.0643
ALOX5	65.1462		LGNCt	81.1067		r1965	54.9763
ALOX52	65.1462		FATP8t	81.1065		ADPRIBt	54.9621
r1401	65.1401		r1291	81.058		FAOXC8C6m	54.813
C40CPT1	65.1401		PIter	80.9908		EX_adn.e.	54.6578
PIK5n	65.1031		r1401	80.9413		ACACtx	54.6036
DATPtm	65.0977		C40CPT1	80.9413		HMGLx	54.6036
NTD9e	65.0462		PItn	80.8697		FATP3t	54.5734
CYTDK1	64.9279		EX_udp.e.	80.837		MALTSULtm	54.4924
RNDR3	64.9278		EX_phe_L.e.	80.8246		FUMTSULtm	54.4924
ORNt3m	64.8195		EX_tyr_L.e.	80.8246		FUMSO3tm	54.4924
ABTD	64.804		RE1342C	80.7847		MALSO3tm	54.4924
ABTti	64.7881		NDPK8n	80.6306		EX_uri.e.	54.488
EX_abt.e.	64.7881		NDPK7n	80.6306		URIt	54.4522
r0010	64.7375		CLOHtex2	80.5683		G3PD1	54.438
H2Otp	64.7028		FAOXC10C8m	80.5566		r1921	54.3642
ACt2r	64.5303		X5MTHFt2	80.5443		EX_thym.e.	54.2532
EX_ac.e.	64.5303		X5MTHFt	80.5442		THYMt	54.2532
EX_orn.e.	64.5273		TRIOK	80.5346		TMDPP	54.2532
ORNTArm	64.5273		KHK	80.5346		TMDS	54.2455
EX_ttdca.e.	64.3323		FBA2	80.5346		DHFR	54.2453
EX_tag_hs.e.	64.332		G6PDA	80.5206		EX_gly.e.	54.1958
EX_leuktrA4.e.	64.3265		EX_idp.e.	80.4706		PI345P5Pn	54.1907
LEUKTRA4t	64.3265		NDP10ex	80.4706		PI45P3Kn	54.1907
EX_thr_L.e.	64.3237		EX_imp.e.	80.4706		RPI	54.1505
MOGAT	64.3197		EX_gam.e.	80.4618		ENO	54.0782
PItn	64.28		GAMt1r	80.4618		ALOX5	54.0547
O2Stm	64.2653		CytOxe.	80.4002		ALOX52	54.0547
ARAB_Lt	64.2635		SOProd	80.4002		X2MCITt	54.0234
ARABR	64.2635		ACCOAC	80.3804		EX_2mcit.e.	54.0234
EX_arab_L.e.	64.2635		PTRCOX1	80.3707		MCITS	54.0234
THBPT4ACAMDASE	64.241		NMNS	80.2536		SBTle	53.9712
PHETHPTOX2	64.241		FAS160COA	80.2516		EX_sbt.d.e.	53.9712
FATP9t	64.2087		TRDR	80.1647		GLNS	53.8113
NRVNCt	64.2055		r0130	80.1603		r0085	53.811
CERK	64.094		FAS180COA	80.0914		r0156	53.811
CRMPte	64.094		STCOAtx	80.0787		UMPK2n	53.7754
EX_crmp_hs.e.	64.094		FAOXC180x	80.0749		NDPK3n	53.7754
PRPPS	64.0694		CYTK9n	80.0673		EX_adprib.e.	53.771
EX_retinol_cis_11.e.	63.9865		EX_glu_L.e.	79.9236		ABTD	53.7405
RETH2e	63.9865		GTHPm	79.872		ABTti	53.7214
GTPCI	63.9762		r0022	79.872		EX_abt.e.	53.7214
PPA2	63.9762		CYSGLTH	79.8047		ASNPHELAT2tc	53.6819
PTHPS	63.9762		EX_Lcystin.e.	79.8047		GTPCI	53.5409
SPR	63.9762		LGTHL	79.7955		PPA2	53.5409
LCADi_D	63.8124		EX_leuktrE4.e.	79.777		PTHPS	53.5409
H2Otn	63.7249		LEUKTRE4t	79.777		SPR	53.5409
EX_cmp.e.	63.5212		EX_leuktrB4.e.	79.7515		PGDI	53.537
NTD4e	63.5212		LEUKTRB4t	79.7515		EX_prostgd2.e.	53.537
CATp	63.5099		LTA4H	79.7515		PGS	53.537
DNDPt14m	63.3336		X2DR1PP	79.6442		PROSTGD2t	53.537
AK2LGCHOLt	63.3099		DRIBt	79.6442		FATP6t	53.4522
EX_ak2lgchol_hs.e.	63.3099		EX_drib.e.	79.6442		ADRNt	53.4435
EX_paf_hs.e.	63.3099		LRAT1	79.5848		PLA2_2e	53.3838
PAFt	63.3099		RETFAt2	79.5848		LPCHOLt	53.381
EX_amp.e.	63.1793		RAI1	79.5848		EX_ppa.e.	53.38
CYTK7	63.1429		RE3272N	79.5718		PPAt	53.38
CO2tm	63.1243		X24_25DHVITD3t	79.5012		r1692	53.3464
FAS80COA_L	63.0588		EX_2425dhvitd3.e.	79.5012		r1787	53.3464
CRVNCtr	63.0444		EX_vitd3.e.	79.5012		r1919	53.3464
FATP7t	63.0404		RE1303C	79.5012		ADPACDAc	53.3464
C30CPT1	63.0242		RE2240C	79.5012		ADPACTD	53.3464
RE1448N	62.9883		ALOX5	79.4137		ADPCOACROT	53.3464
EX_nh4.e.	62.914		ALOX52	79.4137		ADPCOAPTE	53.3464
ATPH1e	62.7972		UNK2	79.4057		C6DCCACT	53.3464
EX_atp.e.	62.7972		EX_adprbp.e.	79.4019		C6DCc	53.3464
ACS2	62.776		EX_nadp.e.	79.4019		P5CR	53.2762
r2404	62.7278		NADPNe	79.4019		UMPK2	53.2556
ARGtm	62.721		TTDCPT1	79.3756		r1254	53.1713
PI4P5Kn	62.671		TTDCPT2	79.3756		GPDDA1	53.1658
SERt4	62.671		TTDCRNt	79.3756		LPASE	53.1658
EX_glc.e.	62.648		PMI12346PH	79.2574		NAt3_1	53.1435
EX_ins.e.	62.4946		PMI12346PHn	79.2574		UMPK3n	53.0012
HMGCOASim	62.4144		MINOHPtn	79.2574		EX_mthgxl.e.	52.7329
RDH1a	62.4008		PPMI12346Ptn	79.2574		MTHGXLt	52.7329
RDH1	62.3935		Htx	79.1387		PAIL4P_HStn	52.6299
H2CO3D	62.3823		r1467	79.1063		EX_gua.e.	52.6089
LGNCt	62.3296		C181CPT1	79.1063		GUAt	52.6089
FATP8t	62.3249		C181CPT2	79.1063		PUNP6	52.564
LGTHL	62.2636		C181CRNt	79.1063		ACACT1rm	52.5468
PYNP2r	62.2416		PAIL4P_HStn	79.1027		NADtm	52.4006
EX_ump.e.	62.1813		CRVNCtr	79.0747		DINt	52.3429
PAN4PP	62.129		FATP7t	79.0737		EX_amp.e.	52.2748
r0578	62.129		NDPK7	79.0452		RE1342C	52.2176
r0591	62.129		DADNt4	79.0426		EX_lnlc.e.	52.0941
r1825	62.1064		ATPH1e	79.0281		LINOFATPtc	52.0941
DNDPt58m	62.0929		EX_atp.e.	79.0281		ARTFR210	52.0941
ALDD2x	62.0141		PYNP2r	79.0056		DATPtn	51.9683
NDPK2	62.0074		SBTD_D2	78.9939		FATP7t	51.6964
MI14P4P	61.9997		r2029	78.7978		ADAe	51.6898
ADRNt	61.9552		ACOAD1fm	78.6916		CRVNCtr	51.6784
FATP6t	61.9544		ECOAH1m	78.6916		HMGCOASim	51.6667
ACACT1rm	61.9302		HACD1m	78.6916		COAtm	51.6561
BTNt3i	61.9206		EX_met_L.e.	78.4804		r1966	51.618
BTNt2	61.9206		CYSTS	78.4804		ATPasel	51.6046
UNK2	61.8601		CYSTGL	78.4804		EX_ha.e.	51.6046
HCO3_CLt	61.7303		MTHFR3	78.4535		GLCAASE8ly	51.6046
HCO3_NAt	61.7266		NTD5m	78.448		GLCAASE9ly	51.6046
EX_gua.e.	61.6964		TMDK1m	78.448		GLCURtly	51.6046
GUAt	61.6964		NDPK3n	78.4135		HAtly	51.6046
DOLGLCP_Uter	61.6828		ARACHDt2	78.3999		NACHEX27ly	51.6046
DOLGPP_Uer	61.6828		EX_arachd.e.	78.3999		C181CPT1	51.5839
DOLPMT4_Uer	61.6828		UMPK2n	78.3472		C181CPT2	51.5839
UDPDOLPT_U	61.6828		PI5P4K	78.3405		C181CRNt	51.5839
ATPS4m	61.6429		RE2973C	78.3405		r1467	51.5834
FAOXC2242046x	61.6302		RE2974C	78.3405		EX_leuktrA4.e.	51.434
NMNS	61.6208		RE3270C	78.3405		LEUKTRA4t	51.434
BDHm	61.5752		LCADi_D	78.1906		PGM	51.4082
BHBt	61.5752		PUNP2	78.1681		ACCOAC	51.354
BHBtm	61.5752		NICRNS	78.0934		r1946	51.149
EX_bhb.e.	61.5752		NP1	78.0934		NDPK2n	51.0078
RE1447N	61.572		r0391	78.0779		PPA	50.8464
ADK1	61.4666		DASCBR	78.02		FAOXC2252053x	50.7822
PI45P4P	61.4347		PUNP3	77.8512		EX_din.e.	50.6785
RIBFLVt3	61.4347		EX_gsn.e.	77.7712		r1832	50.5749
r1726	61.4347		FUMSO3tm	77.742		PI4PP	50.1541
RIBFLVte	61.4347		MALSO3tm	77.742		EX_tyr_L.e.	50.091
EX_adn.e.	61.3351		GALK	77.7032		EX_phe_L.e.	50.091
ACCOAL	61.3137		CERK	77.6907		NAt5	49.8375
ARACHDt2	61.2889		CRMPte	77.6907		KCC2t	49.8306
EX_arachd.e.	61.2889		EX_crmp_hs.e.	77.6907		DGTPtm	49.7331
ATPtm	61.2092		RTOTALt	77.6772		DNDPt6m	49.7235
EX_leuktrC4.e.	61.1425		AK2LGCHOLt	77.6474		THRD_L	49.6906
LTC4CP	61.1425		EX_ak2lgchol_hs.e.	77.6474		CSND	49.6236
LEUKTRC4t	61.1425		EX_paf_hs.e.	77.6474		CSNt	49.6236
DESAT18_8	61.1292		PAFt	77.6474		EX_csn.e.	49.6236
HISt4	61.1292		MI145PP	77.6214		DNDPt37m	49.6078
DIDPtn	61.0932		PI45PLC	77.6214		C4CRNCPT2	49.5398
DITPtn	61.0932		CSNAT3x	77.5673		C4tmc	49.5398
NDPK10	61.0932		PCRNtc	77.5673		CYTK3	49.4627
NDPK10n	61.0932		r1292	77.5673		HIBDm	49.2355
MI1PP	61.0888		ORNt3m	77.4721		OIVD2m	49.2355
PIPLC	61.0888		PPAm	77.4455		ACOAD9m	49.2355
FAOXC4C2m	61.0744		ESTRADIOLtr	77.4003		ECOAH12m	49.2355
CYSTALArBATtc	61.0662		ESTRONEtr	77.4003		X3HBCOAHLm	49.2355
PLA2_2e	60.9754		HSD17B7r	77.4003		EX_val_L.e.	49.2355
EX_h2o2.e.	60.9099		UMPK3n	77.3442		O2tp	49.0508
H2O2t	60.9099		ADK3m	77.2719		DNDPt30m	49.0285
NTD12	60.9098		EX_leuktrD4.e.	77.2407		DURIPP	48.924
NTPP10	60.9098		LEUKTRD4t	77.2407		r1916	48.8858
TCHOLAte	60.8496		LTD4DP	77.2407		R_group_phosphotase_1	48.8552
TCHOLAt	60.8496		PLA2_2e	77.1661		PUNP2	48.7954
EX_nad.e.	60.8398		STRDNCCOAtxc	77.1293		DNDPt40m	48.7147
NADNe	60.8398		X3MOBt2im	77.0697		FATP9t	48.6874
GCCam	60.8347		VALTA	77.0697		NRVNCt	48.6829
GCCbim	60.8347		VALt5m	77.0692		EX_hxan.e.	48.4494
GCCcm	60.8347		VALTAm	77.0692		HYXNt	48.4494
NDPK7n	60.8187		ADPRDP	77.0494		SERtN1	48.4226
BILDGLCURtr	60.8026		ADPRIBt	77.0494		PUNP3	48.3805
r0813	60.8026		EX_pchol_hs.e.	76.8451		EX_gsn.e.	48.2845
BILDGLCURt	60.8026		H2Otp	76.8361		r0456	48.0366
GTHP	60.7832		C30CPT1	76.809		DGK1	48.0366
EX_tyr_L.e.	60.7516		PUNP1	76.7486		GK1	48.0365
EX_phe_L.e.	60.7516		ARGtm	76.7063		RNDR2	48.0365
NAt3_1	60.6307		NTD2	76.6568		FAOXC2242046x	47.9893
PE_HStm	60.6218		r2404	76.6156		DNDPt58m	47.9238
AMETt2m	60.6217		FAOXC4C2m	76.6116		DGTPtn	47.892
PCFLOPm	60.6217		MCCCrm	76.6107		r0358	47.8628
PETOHMm_hs	60.6217		MGCHrm	76.6107		FATP8t	47.774
FATP2t	60.5732		ACOAD8m	76.6107		LGNCt	47.76
OCDCEAtr	60.5705		RE1518M	76.5757		VALt4	47.6935
GTHS	60.5537		RE2998M	76.5757		VALtec	47.6864
GLUCYS	60.5537		DNDPt24m	76.5022		r2405	47.566
r2055	60.4061		PCm	76.4971		r2416	47.566
NTD5m	60.3178		MALSO4tm	76.4589		NDPK2	47.5368
TMDK1m	60.3178		FUMSO4tm	76.4589		EX_cl.e.	47.5209
RTOT1	60.3093		r1994	76.4434		ASNtN1	47.4554
GMPR	60.2415		EX_gua.e.	76.3222		GLUDym	47.1898
ADPRDP	60.1893		GUAt	76.3222		Htx	47.1165
ADPRIBt	60.1893		CYTD	76.3164		PGI	47.0855
D_LACt2	60.1462		GTPCI	76.3102		GLUDxm	47.0414
EX_lac_D.e.	60.1462		PPA2	76.3102		G5SDym	46.9901
MMSAD1m	60.0784		PTHPS	76.3102		GLU5Km	46.9901
ADPT	60.0649		SPR	76.3102		CSNAT2m	46.8839
ICDHyrm	60.0165		EX_gal.e.	76.2521		PCRNtm	46.8839
ICDHxm	60.0122		GALt1r	76.2521		C30CPT1	46.8839
GUAPRT	59.9993		UDPG4E	76.2521		r1291	46.8811
MTHFDm	59.9718		MALTSULtm	76.2493		r1931	46.7711
MTHFD2m	59.9718		FUMTSULtm	76.2493		RTOTAL3FATPc	46.696
DHCRD1	59.948		HCO3_NAt	76.2115		L_LACDcm	46.6292
r1798	59.8903		R_group_phosphotase_1	76.194		LDH_L	46.6246
EX_pchol_hs.e.	59.8488		r1721	76.1865		PAFH	46.5035
PAIL45P_HStn	59.7641		r2399	76.1865		PAFS	46.4574
r0652	59.7123		LYStm	76.1814		NDPK6m	46.4317
r1449	59.7123		FTHFCL	76.181		SERDGLNexR	46.3841
ACACt2m	59.6947		X5FTHFt2	76.181		SERDGLYexR	46.3841
PMI1346PH	59.6936		EX_5fthf.e.	76.181		RDH3	46.2353
PMI1346PHn	59.6936		r2012	76.1563		RDH3a	46.2353
MI13456Ptn	59.6936		CYTK7n	76.1162		RTOTALt	46.1581
PPMI1346Ptn	59.6936		TRPt4	76.0678		SBPP1er	46.1554
r2012	59.6901		PUNP5	76.0104		SPH1Ptr	46.1554
CYSSERNaEx	59.6901		NTD7e	76.0048		SPHGNtr	46.1554
EX_retinol.e.	59.5599		MMTSADm	75.9473		r1986	46.1554
CITRtm	59.508		r1538	75.9132		r2038	46.1554
EX_retn.e.	59.4647		THBPT4ACAMDASE	75.8879		PI34P4Pn	45.9044
RETNt	59.4647		PHETHPTOX2	75.8879		ALAGLNexR	45.8724
GLCt1r	59.4636		HCO3_CLt	75.7696		r1451	45.8027
ORNt4m	59.4403		EX_nad.e.	75.6607		DNDPt63m	45.801
r1464	59.4062		NADNe	75.6607		FAOXC101C8m	45.7813
MMMm	59.3792		EX_cytd.e.	75.585		EX_asn_L.e.	45.7562
PDHm	59.3366		BDHm	75.5755		r0127	45.7562
EX_cit.e.	59.3103		BHBt	75.5755		RAI2	45.6286
r1090	59.3103		BHBtm	75.5755		RETI2	45.6124
O2Stx	59.2602		EX_bhb.e.	75.5755		r1822	45.5638
SPODMx	59.2602		HDCAtr	75.5298		P5CDm	45.5299
ILEtec	59.0223		FATP1t	75.5293		DHPR2	45.4826
LRAT2	58.9538		ILETA	75.3826		GGT6	45.3353
MMEm	58.9118		X3MOPt2im	75.3826		THBPT4ACAMDASE	45.3329
MMCDm	58.9118		DESAT18_9	75.3724		PHETHPTOX2	45.3329
RAI3	58.8893		ILETAm	75.3722		OIVD1m	45.3105
RDH4	58.8893		ILEt5m	75.3722		LEUTAm	45.3105
RETI3	58.8893		NTD2e	75.3671		LEUt5m	45.3105
LALDO2x	58.7321		EX_malt.e.	75.2951		MMTSADm	45.1854
EX_adprbp.e.	58.6929		MALT	75.2951		RNDR4	45.0309
EX_nadp.e.	58.6929		MALTt1r	75.2951		r0475	45.0288
NADPNe	58.6929		PRPPS	75.2271		X2DR1PP	44.9905
ATPtn	58.6261		PIt8	75.0524		DRIBt	44.9905
DNADtn	58.6261		EX_hxan.e.	74.9794		EX_drib.e.	44.9905
NICRNTtn	58.6261		HYXNt	74.9794		ADEt	44.9583
NNATn	58.6261		r0911	74.9076		EX_ade.e.	44.9583
r0584	58.6261		GCCam	74.8468		FAOXC4C2m	44.7148
H2O2tm	58.6253		GCCbim	74.8468		EX_na1.e.	44.5572
r1690	58.4218		GCCcm	74.8468		RE3273C	44.4415
NDPK1n	58.4084		PUNP4	74.8088		NTD5m	44.3707
ARTFR12	58.3777		EX_ppa.e.	74.7533		TMDK1m	44.3707
HDCAtr	58.3711		PPAt	74.7533		EX_orn.e.	44.1955
FATP1t	58.3693		ARTFR12	74.7189		ORNTArm	44.1955
DNDPt6m	58.3573		ICDHxm	74.7132		GALU	44.0613
CYTK5n	58.3167		ICDHyrm	74.7108		GALT	44.0609
ASNtN1	58.1224		DURIt	74.6808		UGLT	44.0602
ALADGLNexR	58.1185		EX_duri.e.	74.6808		r0010	44.0183
ALADGLYexR	58.113		MTHFD2m	74.5874		SPODM	43.998
EX_malt.e.	58.0458		MTHFDm	74.5874		r1401	43.9452
MALT	58.0458		ACSm	74.4797		C40CPT1	43.9452
MALTt1r	58.0458		NOS1	74.4183		CRNCARtp	43.9377
SERGLYexR	57.9961		NOS2	74.4183		CSNATp	43.9377
ACSm	57.9845		EX_ribflv.e.	74.2588		PAIL_HStn	43.9051
EX_leuktrE4.e.	57.933		FMNAT	74.2588		ALDD2y	43.7799
LEUKTRE4t	57.933		RBFK	74.2588		TYRt4	43.7292
TTDCAFATPc	57.8666		RTOT1	74.1971		EX_ins.e.	43.602
PSSA1_hs	57.8647		ACt2m	74.1318		EX_fol.e.	43.5034
RE3301C	57.8646		ASNt4	74.0166		r0512	43.5034
PCHOLP_hs	57.86		PUNP6	74.0099		ALAGLYexR	43.4546
ACt2m	57.8499		FATP2t	73.9531		IMPD	43.358
GHMT2rm	57.7686		r2412	73.9271		NTD10	43.358
r1435	57.7686		OCDCEAtr	73.8571		PUNP7	43.358
LPCHOLt	57.754		ALAR	73.8023		LRAT1	43.2552
DESAT22_1p	57.6712		EX_ala_D.e.	73.8023		RETFAt2	43.2552
DURIPP	57.6624		CITtam	73.726		EX_pro_L.e.	43.1282
r0475	57.6245		EX_xylt.e.	73.5989		EX_leuktrD4.e.	43.0737
GTHO	57.6138		XYLTt	73.5989		LEUKTRD4t	43.0737
RE1520M	57.5666		EX_ser_L.e.	73.5723		LTD4DP	43.0737
RE1527M	57.5666		O2Stx	73.57		CYTK7	43.0736
RE1534M	57.5666		SPODMx	73.57		UMPK7	43.0439
GTHPm	57.4786		FAS80COA_L	73.5195		FATP1t	42.8471
r0022	57.4786		GPDDA1	73.5101		HDCAtr	42.8328
ADNCYC	57.4326		LPASE	73.5101		RE3629C	42.8017
CAMPt	57.4326		GCHOLAte	73.4942		RE3630C	42.8017
EX_camp.e.	57.4326		GCHOLAt	73.4942		RDH2a	42.772
EX_cys_L.e.	57.4129		EX_o2s.e.	73.3565		RDH2	42.7325
ALCD21_D	57.3751		O2St	73.3565		RE3272N	42.6502
PPDOy	57.3751		RETFAt1	73.3476		DNDPt39m	42.6125
EX_h2o.e.	57.2953		URIK1	73.3115		MTHFD	42.5096
DHPR	56.9762		RTOT2	73.28		MTHFD2	42.5096
THYMDtm	56.9758		EX_strdnc.e.	73.2078		GLNtN1	42.4959
RNDR4	56.9739		STRDNCt	73.2078		GSNt4	42.3936
RE3627M	56.9575		ARTFR13	73.2038		GSNt	42.3712
RE3628M	56.9575		DGSNt	73.1785		EX_ncam.e.	42.2901
RTOT4	56.9046		EX_dgsn.e.	73.1785		ILEtec	42.1329
ARTFR41	56.8911		DINt	73.174		RTOTAL2FATPc	41.9821
NDPK7	56.7816		RE0830N	73.1603		PROIMINOtc	41.8255
SBTle	56.589		RE1709N	73.1603		EX_arg_L.e.	41.751
EX_sbt.d.e.	56.589		RE2660N	73.1603		EX_o2.e.	41.6536
PYRt2m	56.5493		ARTFR207	73.1262		O2t	41.6536
SERtN1	56.3855		H2O2tp	73.0737		P5CRxm	41.5821
AGPAT1	56.3638		ACONT	73.0612		HCO3_CLt	41.4073
GPAM_hs	56.3638		r2387	73.0527		PItn	41.3998
ALCD22_D	56.336		EX_gln_L.e.	72.9457		H2Otn	41.3973
OXAHCOtex	56.336		EX_Rtotal3.e.	72.926		HIStN1	41.3629
SO4OXAtex2	56.336		ACONTm	72.8933		CYTK5	41.3577
RDH3	56.3244		NTD5	72.8735		DADA	41.3546
RDH3a	56.3244		EX_dad_2.e.	72.7956		HCO3_NAt	41.2639
NDPK2n	56.3177		FADtm	72.7795		r1991	41.2629
DUTPDPm	56.314		ACt2r	72.7009		EX_leuktrC4.e.	41.1844
URIDK2m	56.314		EX_ac.e.	72.7009		LTC4CP	41.1844
GTHDH	56.2034		NTD9e	72.4993		LEUKTRC4t	41.1844
r1991	56.136		LALDO	72.4736		RE3627M	41.1279
CRNrtx	56.0565		EX_tag_hs.e.	72.4405		RE3628M	41.1279
UMPK2n	56.0541		CYSTALArBATtc	72.2594		PPAm	41.101
NDPK3n	56.0541		EX_o2.e.	72.1518		H2O2tm	41.069
MTHFD2	56.0148		O2t	72.1518		RETFA	41.0153
MTHFD	56.0148		ACOAD10m	72.0968		RETFAt	41.0153
PROt2r	55.9038		EX_gluala.e.	72.0702		RETHe	41.0113
DGK1	55.8943		GTMLTe	72.0702		CYTK1n	40.9721
GK1	55.8943		PI45P5P	71.8936		ADK3m	40.9636
RNDR2	55.8943		r1892	71.868		ICDHyrm	40.8961
NTD8	55.8912		RE3301C	71.8512		ICDHxm	40.8959
r0358	55.792		PSSA1_hs	71.8511		MTHFD2m	40.8939
r2027	55.7875		PCHOLP_hs	71.8508		MTHFDm	40.8938
DADNt4	55.7736		G5SADrm	71.6241		EX_h2o2.e.	40.8314
PUNP2	55.7413		SBPP1er	71.6229		H2O2t	40.8314
r1941	55.7354		SPH1Ptr	71.6229		SBTD_D2	40.5772
r1989	55.7085		SPHGNtr	71.6229		HXPRT	40.4845
r2040	55.6251		EX_hco3.e.	71.5957		r0911	40.4134
G3PD2m	55.6132		NTD4	71.5791		ILELAT1tc	40.3174
PI4PP	55.6106		CTPS1	71.5791		LEUtec	40.3166
PAIL_HStn	55.4781		ADEt	71.4858		RE1520M	40.29
UMPK3n	55.4663		EX_ade.e.	71.4858		RE1527M	40.29
EX_h.e.	55.4422		EX_amp.e.	71.3885		RE1534M	40.29
FAOXC80	55.3636		ARAB_Lt	71.3629		EX_leu_L.e.	39.8111
ESTRADIOLtr	55.2964		ARABR	71.3629		PROD2	39.8009
ESTRONEtr	55.2964		EX_arab_L.e.	71.3629		RE3347C	39.6899
HSD17B7r	55.2964		r0395	71.3205		EX_thymd.e.	39.6534
EX_dad_2.e.	55.2478		EX_orn.e.	71.1871		THYMDt1	39.6534
SBTR	55.2369		ORNTArm	71.1871		DGK2m	39.6523
ALAASNNaEx	55.2256		RDH1	71.1448		DGNSKm	39.6523
NDPK6	55.1444		RDH1a	71.1409		DGSNtm	39.6523
ILEPHELAT2tc	55.0739		ORNt4m	71.0568		AACOAT	39.6096
THYOXt	55.0687		CITRtm	71.0558		ACCOAL	39.455
r2194	55.0687		DESAT22_1p	70.951		CYTK8	39.3637
MGSA2	54.9998		AMPTASECG	70.8312		ACACT1x	39.3464
EX_gsn.e.	54.9972		r0129	70.8312		r0463	39.3464
ACALDtx	54.9123		LRAT2	70.6607		ADNCYC	39.3209
CAT2p	54.9123		r1844	70.4845		CAMPt	39.3209
ETOHtx	54.9123		PI4PLC	70.3347		CERK	39.3209
PUNP3	54.8524		DNDPt32m	70.2741		CRMPte	39.3209
FATP3t	54.7964		NAt3_1	70.1639		EX_11_cis_retfa.e.	39.3209
OCDCAtr	54.796		CYSTLEUrBATtc	70.0107		EX_9_cis_retfa.e.	39.3209
ETF	54.7147		FAOXC12C10x	70.0086		EX_camp.e.	39.3209
ETFQO	54.7147		ETF	69.942		EX_crmp_hs.e.	39.3209
CSND	54.6184		ETFQO	69.942		EX_lpchol_hs.e.	39.3209
CSNt	54.6184		r2409	69.9211		EX_retinol_cis_11.e.	39.3209
EX_csn.e.	54.6184		DCYTt	69.8959		RETH2e	39.3209
EX_leuktrD4.e.	54.611		EX_dcyt.e.	69.8959		r1825	39.3209
LEUKTRD4t	54.611		DCYTD	69.8773		PRPPS	39.3169
LTD4DP	54.611		FAOXC2242046x	69.7538		RETt	39.2118
r1154	54.3703		RE1530M	69.7052		DAGK_hs	39.1771
r1155	54.3703		TTDCAFATPc	69.6971		VITD3t	39.1272
CSNAT3x	54.3592		FAOXC2252053x	69.5437		VITD3t2	39.1272
PCRNtc	54.3592		DCMPDA	69.4552		O2Stx	39.1044
r1292	54.3592		NADtn	69.3706		SPODMx	39.1044
NDPK1	54.2852		NMNATn	69.3706		ALAyLATthc	39.025
r0395	54.2221		NMNtn	69.3706		RDH1a	39.0201
FADH2ETC	54.1353		EX_pi.e.	69.3559		RDH1	39.0155
MALTSULtm	54.0784		EX_ins.e.	69.3148		EX_cgly.e.	39.0102
FUMTSULtm	54.0784		ADKd	69.2856		SPMDOX	38.9268
X3DSPHR	54.0293		RNDR1	69.2856		RE0691C	38.9268
SERPT	54.0293		EX_leuktrF4.e.	69.216		RE1897C	38.9268
NT5C	53.9842		LEUKTRF4t	69.216		RE1898C	38.9268
r1702	53.9842		ETOHt	69.1455		EX_ura.e.	38.8648
r1790	53.9842		EX_etoh.e.	69.1455		URAt	38.8648
AACOAT	53.9722		RTOT4	69.0561		UTPtn	38.7769
ALCD2yf	53.941		ARTFR41	69.0559		EX_h2o.e.	38.7282
EX_mthgxl.e.	53.9257		H2CO3D	69.0522		OCDCEAtr	38.6841
MTHGXLt	53.9257		SERDGLNexR	68.9143		FATP2t	38.6817
CO2t	53.8664		SERDGLYexR	68.9143		PYNP2r	38.6708
EX_co2.e.	53.8664		ACALDtx	68.8379		CSNATr	38.3563
TPI	53.8169		CAT2p	68.8379		EX_nad.e.	38.1004
ACALDtm	53.7367		ETOHtx	68.8379		NADNe	38.1004
ALDD2xm	53.7367		EX_ttdca.e.	68.7675		ADNK3	37.9197
INSK	53.7228		r0652	68.7163		G5SADs	37.8401
CTPS1	53.715		r1449	68.7163		GLU5SAtmc	37.8401
LRAT1	53.6394		NDPK6	68.6662		FAOXC2251836x	37.7483
RAI1	53.6394		GCC2am	68.5872		DNDPt60m	37.7365
RETFAt2	53.6394		GCC2bim	68.5872		PROt4	37.6895
r0130	53.6354		GCC2cm	68.5872		EX_gmp.e.	37.6384
r1936	53.6185		X3DSPHR	68.5834		EX_dad_2.e.	37.54
r2409	53.3594		SERPT	68.5834		BDHm	37.4337
ACTLMO	53.3529		CYSTGLUex	68.5801		BHBt	37.4337
MALSO4tm	53.3468		CYTK11n	68.5535		BHBtm	37.4337
FUMSO4tm	53.3468		FOLt2	68.5398		EX_bhb.e.	37.4337
EX_glu_L.e.	53.333		FOLTle	68.5398		EX_ps_hs.e.	37.3581
r1717	53.3048		CEPTC	68.5166		PSt3	37.3581
r2412	53.2577		CHLPCTD	68.5166		DHCRD1	37.3478
RDH2	53.2103		CHOLK	68.5166		ATPtn	37.3313
RDH2a	53.1993		r1909	68.5166		DTDPtn	37.0367
EX_asn_L.e.	53.1505		RE3347C	68.3899		DTTPtn	37.0367
r0127	53.1505		PROD2	68.3895		NDPK4n	37.0367
NTD1m	53.1249		PAIL_HStn	68.2344		EX_retfa.e.	37.0037
NOS1	53.1136		EX_cmp.e.	68.1842		INSt4	37.0037
NOS2	53.1136		NTD4e	68.1842		INSt	36.9661
r0853	53.0872		r0321	67.9901		NADK	36.7406
ASCBOX	53.0595		DGNSKm	67.9058		PI5P4K	36.5749
XOLEST2HSTDle	53.034		DGK2m	67.9058		ACTLMO	36.5737
ADK1m	52.9938		DGSNtm	67.9058		GTPtn	36.4489
ICDHy	52.9626		EX_ump.e.	67.8997		r1672	36.3754
ALAGLNexR	52.9193		ACALDtm	67.8849		TPI	36.3684
PUNP5	52.9002		ALDD2xm	67.8849		CYSGLYexR	36.3558
GSNt	52.8663		SBTle	67.7535		G5SADrm	36.216
GSNt4	52.8525		EX_sbt.d.e.	67.7535		CYTK13	36.2133
GLYSNAT5tc	52.8099		NDPK5m	67.6882		CYTK4	36.1233
CYSSNAT5tc	52.7219		EX_adprib.e.	67.6875		CHOLESACATc	35.8749
r1254	52.7178		ALAtN1	67.5994		CHOLESTle	35.8749
UGLT	52.6523		EX_ura.e.	67.5519		ARGSL	35.8574
GALT	52.6512		URAt	67.5519		ARGSS	35.8574
GALU	52.6498		CO2t	67.545		EX_ala_L.e.	35.6986
HISSNAT5tc	52.6332		EX_co2.e.	67.545		MI1PP	35.498
PUNP6	52.5788		THYMDtm	67.3742		FAOXC12C10x	35.4296
ASNATB0tc	52.5537		VALtec	67.3437		TRIOK	35.4048
FADtm	52.5356		CSND	67.3137		KHK	35.4048
r1931	52.4919		CSNt	67.3137		FBA2	35.4048
PI45P5P	52.3754		EX_csn.e.	67.3137		ATPS4m	35.3929
LYStm	52.349		ATPtm	67.3122		EX_ump.e.	35.3769
PALFATPtc	52.2951		r1991	67.2378		NDPK1n	35.0527
EX_leuktrF4.e.	52.2576		RDH2a	67.1505		CYTK5n	35.0473
LEUKTRF4t	52.2576		RDH2	67.1502		SERALANaEx	34.8926
LNLCCPT1	52.2569		EX_cit.e.	66.9944		r1824	34.5689
LNLCCRNt	52.2569		r1090	66.9944		CLOHtex2	34.4551
LNLCCPT2	52.2569		ACACT1rm	66.9698		X5MTHFt	34.4143
FAOXC182806m	52.2569		LNLNCACPT1	66.8652		X5MTHFt2	34.4143
EX_gmp.e.	52.1954		LNLNCACRNt	66.8652		CYTK1	34.3945
ALAt4	52.0567		LNLNCACPT2	66.8652		FAOXC10C8x	34.3412
PI4P3Kn	52.0493		FAOXC183803m	66.8652		ATPtm	33.7966
ORNALArBATtc	52.0415		NTD1m	66.8167		GLYOX	33.7305
RE0830N	52.0217		ACS2	66.7402		PIPLC	33.7305
RE1709N	52.0217		GSNtm	66.7005		r1779	33.7305
RE2660N	52.0217		GSNKm	66.7005		RE2973C	33.7305
OCOAT1m	52.0057		GK1m	66.7005		RE2974C	33.7305
EX_adprib.e.	51.8384		P5CR	66.6489		RE3270C	33.7305
OCCOAtm	51.7766		GLNCYSNaEx	66.599		DNDPt10m	33.7305
C181CPT1	51.6865		EX_glyc.e.	66.5626		P5CRm	33.7305
C181CPT2	51.6865		GLYCt	66.5626		r0398	33.679
C181CRNt	51.6865		ATPH2e	66.5272		UMPK5	33.6718
r1467	51.6863		EX_adp	66.5272		CO2t	33.6695
OIVD1m	51.591		UGLT	66.5165		EX_co2.e.	33.6695
LEUTAm	51.591		GALT	66.516		PROt2r	33.5516
LEUt5m	51.591		GALU	66.5149		FAOXC6C4m	33.3159
RTOTAL3FATPc	51.5579		ILEtec	66.5012		DNDPt7m	33.3084
ORNtiDF	51.4506		RNDR3	66.4701		LPS2	33.284
RADH3	51.4331		CYTDK1	66.4701		r0395	33.2375
X3HCO3_NAt	51.4178		P5CRxm	66.4472		UMPK3	33.1615
CITtam	51.3071		FAOXC161802m	66.3833		DNDPt8m	33.0721
CYTK8	51.1087		r0310	66.3833		EX_Rtotal.e.	33.0078
ADK3m	51.0826		FAOXC140	66.2806		RE1519M	32.9568
XOLEST2te	51.0809		r2400	66.2195		RE3626M	32.9568
VALtec	50.9855		HXPRT	66.1504		ILEATB0tc	32.9194
VALt4	50.9778		PDHm	65.9322		DCTPtn	32.8906
NDPK5n	50.8795		ASNSERNaEx	65.8925		r1796	32.7875
EX_hxan.e.	50.8391		r1679	65.8608		AMPDA	32.7786
HYXNt	50.8391		ACTNMO	65.8535		BTNt3i	32.64
r1971	50.8379		ACETONEt2	65.8535		BTNt2	32.64
CYSGLNNaEx	50.7712		EX_acetone.e.	65.8535		NDPK6	32.6103
DNDPt37m	50.7397		r1459	65.7454		CYTK10n	32.4399
r1926	50.6421		HMGCOASim	65.6126		CYTK10	32.2083
ADAe	50.6261		r0311	65.5779		CYTK8n	32.0883
URIK1	50.5956		PMTCOAFABP1tc	65.5779		DURIK1m	32.0809
CYTK9n	50.5341		ACACt2m	65.5407		ALAGLNNaEx	32.0515
NTD1	50.4812		EX_mthgxl.e.	65.4752		CYStec	32.0061
r1817	50.4812		MTHGXLt	65.4752		ACALDtm	31.9525
DUDPtn	50.4812		EX_glc.e.	65.3937		ALDD2xm	31.9525
DUMPtn	50.4812		GLCt1r	65.3935		ALDD2x	31.8723
DUTPDPn	50.4812		EX_ocdca.e.	65.2418		EX_glc.e.	31.8539
NDPK6n	50.4812		RE0344C	65.2418		GLCt1r	31.8539
DGK2m	50.2659		EX_h2o.e.	65.2258		NTD6	31.7952
DGNSKm	50.2659		r2416	65.1751		NMNS	31.685
DGSNtm	50.2659		ASNtN1	65.1032		G6PPer	31.681
ALAtN1	50.2252		r2410	64.9022		G6Pter	31.681
FTHFCL	50.1908		PPA	64.8994		PIter	31.681
X5FTHFt2	50.1908		ALCD2yf	64.7723		r2041	31.6205
EX_5fthf.e.	50.1908		EX_gmp.e.	64.6742		ALCD21_D	31.4408
r0398	50.1711		PI4PP	64.6413		PPDOy	31.4408
ARTFR42	50.1423		ARTFR44	64.5466		NTD12	31.4382
CYTK10n	50.1125		EX_adn.e.	64.5401		NTPP10	31.4382
PUNP1	50.1082		CYTK1n	64.4788		biomass_reaction	31.2854
LPS	50.0662		HEX10	64.4701		TTDCAtr	31.0196
PAFS	50.0432		PPAn	64.4641		FACOAL140i	31.0196
PAFH	50.0185		LYStiDF	64.4019		MTHFR3	30.9502
DUTPDP	49.8596		MI14P4P	64.3909		NDPK5n	30.7082
X24_25DHVITD3t	49.745		MI1PP	64.3909		NTD1m	30.6866
EX_2425dhvitd3.e.	49.745		C180CPT1	64.3735		GNDc	30.483
EX_vitd3.e.	49.745		C180CPT2	64.3735		GLYt4	30.397
RE1303C	49.745		C180CRNt	64.3735		NTD11	30.2968
RE2240C	49.745		OCDCAtr	64.3643		EX_ocdca.e.	30.2694
CYTK5	49.7209		FATP3t	64.3613		KCCt	30.2694
r2043	49.688		r1827	64.3288		NaKt	30.2694
NAt5	49.53		r1050	64.2588		r1936	30.2694
KCC2t	49.524		ALADGLNexR	64.1848		r1941	30.2694
r2387	49.4879		ALADGLYexR	64.1797		r2050	30.2694
GND	49.4453		EX_hdca.e.	64.1678		CYSSNAT5tc	30.2694
DNDPt26m	49.402		FAOXC101C8m	64.1113		GLCter	30.2382
ACONT	49.328		RE2954C	64.0817		DADNt4	30.2193
GLNALANaEx	49.2879		O2tm	64.0683		H2Oter	30.17
EX_ribflv.e.	49.2833		NDPK4	64.0442		DGSNt	30.086
FMNAT	49.2833		PYK	64.0379		EX_dgsn.e.	30.086
RBFK	49.2833		RNDR4	64.006		PUNP4	30.086
FAOXC161802m	49.1768		H2O2tm	63.9918		r1669	29.9299
r0310	49.1768		r0475	63.9755		GTHS	29.8039
FACOAL184	49.1537		r1451	63.8217		GLUCYS	29.8039
r0321	49.1424		r1464	63.6345		ALAtN1	29.6145
NTD11	49.0974		ASNATB0tc	63.5923		r1971	29.4084
NADtm	49.0592		r1154	63.5461		VALt5m	29.349
L_LACt2r	49.0159		r1155	63.5461		VALTAm	29.349
L_LACt4r	49.0159		NTD6	63.5289		X3MOBt2im	29.3478
r1837	49.0159		r1254	63.468		VALTA	29.3478
r2029	49.0159		NDPK3	63.4198		EX_cytd.e.	29.2916
TRPATB0tc	49.0159		NDPK5n	63.3755		r0527	29.2671
GLYOX	49.0062		RE1519M	63.3644		CYTD	29.2413
r2046	48.9596		RE3626M	63.3644		ARGtm	29.0999
ACONTm	48.9552		CO2tm	63.3491		r2404	29.0998
NTD2	48.8398		TTDCAtr	63.2849		NCAMUP	28.9879
ACOAHi	48.813		FACOAL140i	63.2849		EX_nac.e.	28.9879
r1779	48.7898		EX_din.e.	63.2525		CYSGLNNaEx	28.9816
CYTK11n	48.7844		PMI1346PH	63.1696		AMPTASECGe	28.9282
ADNK3	48.7795		PMI1346PHn	63.1696		LNELDCCPT1	28.9205
DNDPt57m	48.6884		MI13456Ptn	63.1696		LNELDCCRNt	28.9205
DINt	48.6502		PPMI1346Ptn	63.1696		LNELDCCPT2	28.9205
ALAGLNNaEx	48.4949		r0145	63.1308		FAOXC18280m	28.9205
G5SADs	48.2818		MTHFD	62.9093		PI45P5Pn	28.8568
GLU5SAtmc	48.2818		MTHFD2	62.9093		r1826	28.8568
GLNSERNaEx	48.2655		DATPtm	62.8945		r1910	28.8568
ACRNtm	48.2191		r2405	62.8882		r1926	28.8568
CSNATm	48.2191		EX_nh4.e.	62.8229		DNDPt18m	28.8568
ALAATB0tc	48.2191		CYTK10n	62.7981		ILETA	28.8568
ARTFR204	48.2191		r2070	62.7543		X3MOPt2im	28.8568
TMDK1	48.2164		LDH_L	62.663		RADH2	28.8318
CYSALANaEx	48.0046		L_LACDcm	62.663		ILETAm	28.8125
r2032	47.9503		G3PD1	62.5339		ILEt5m	28.8125
r2406	47.9503		PPItm	62.4788		DNDPt23m	28.6867
UMPK3	47.9197		VALt4	62.467		ARGtiDF	28.6654
ETOHMO	47.9104		DADAe	62.4561		EX_gluala.e.	28.636
MGSA	47.8545		FADH2ETC	62.4252		GTMLTe	28.636
FACOAL160i	47.7811		RNMK	62.236		ADK1m	28.4135
NADtn	47.7708		PNP	62.236		LRAT2	28.1113
NMNATn	47.7708		HMGCOAtm	61.9669		RETFAt1	28.1113
NMNtn	47.7708		r2011	61.9666		UMPK4	27.9547
CYTK3	47.4769		PYRt2m	61.9559		NDPK5	27.7503
DNDPt41m	47.4312		NAt5	61.8555		DNDPt38m	27.6875
r1396	47.375		KCC2t	61.8511		UMPK6	27.5981
r1397	47.375		GND	61.8355		NDPK5m	27.2193
r2437	47.375		UMPK7	61.5443		OCCOAtm	26.9445
PPAm	47.3643		r0010	61.3329		PMTCOAtx	26.8755
PPItm	47.2842		ICDHy	61.2275		ALAASNNaEx	26.0082
NDPK8	47.2336		r1764	61.2165		GSNtm	26.0082
SPODM	47.0872		PAN4PP	61.2085		GSNKm	26.0082
r1672	47.0642		r0578	61.2085		GK1m	26.0082
CYTK14	46.9439		HMGLm	61.1995		PTRCOX1	25.6171
HMGCOAtm	46.8865		EX_lpchol_hs.e.	61.0746		r0853	25.2897
DNDPt60m	46.8793		r1907	61.061		PCHOLHSTDe	25.2533
GNDc	46.7261		AMPDA	60.9383		r2042	24.5502
ALAGLYexR	46.6853		MGSA	60.8663		DNDPt41m	24.4818
HMGLm	46.6747		r1889	60.8503		ALCD22_L	24.3473
r1916	46.6679		r1787	60.8503		ALCD21_L	24.3473
FAOXC6C4m	46.6567		CYTK5n	60.8174		ALR3	24.3473
r1832	46.6132		RE3629C	60.7114		ALR2	24.3402
GF6PTA	46.6102		RE3630C	60.7114		GCC2am	24.0566
PI4PLC	46.5832		ARGtiDF	60.6928		GCC2bim	24.0566
CYTK10	46.4219		XOL7AONEtr	60.6541		GCC2cm	24.0566
RE3629C	46.4208		r1024	60.6541		r1828	23.9138
RE3630C	46.4208		r1901	60.6541		SERATB0tc	23.6798
DNDPt38m	46.2708		CATp	60.3856		NTD7	23.487
r1538	46.2258		CYTK14	60.3813		FOLt2	23.4201
NDPK6m	46.213		FAOXC1811603m	60.3336		FOLTle	23.4201
HISyLATtc	46.2062		EX_gdp.e.	60.3054		EX_adprbp.e.	22.9359
UMPK2	46.187		r2425	60.2344		EX_nadp.e.	22.9359
r1986	46.1641		TPI	60.2213		NADPNe	22.9359
r1681	46.1641		ADK1	60.2166		ORNALArBATtc	22.871
r2054	46.1641		FACOAL184	60.1876		EX_retinol_9_cis.e.	22.8346
VITD3t2	46.1377		ARTCOAL1	60.0562		RETH1e	22.8346
RADH4	45.9808		CYStec	60.0092		ACOAHi	22.4625
NDPK3	45.9723		RTOTAL2t	59.937		DADAe	22.3947
r0399	45.9624		PAFH	59.8694		SERGLNexR	22.2514
EX_ncam.e.	45.9256		PAFS	59.8597		ALCD1	22.113
RTOTAL2t	45.9204		CYTK13	59.7308		XOLEST2te	22.027
FAOXC140	45.8635		NDPK1n	59.6402		FALDtly	22.026
VITD3t	45.8473		SERtN1	59.5562		H2O2tly	22.026
DADAe	45.7379		r1742	59.5519		MEOHtly	22.026
DPMVDc	45.7194		NACDe	59.4773		PRDXl	22.026
MEVK1c	45.7194		PCHOLHSTDe	59.418		H2Otly	21.8556
PMEVKc	45.7194		OBDHc	59.3178		CYTK11	21.7566
PI45P5Pn	45.7194		MGSA2	59.2846		EX_hdcea.e.	21.7425
DNDPt40m	45.6449		NDPK2	59.2338		FACOAL161	21.7425
THRPHELAT2tc	45.4766		CYTK8	59.1038		HDCEAtr	21.7425
FAOXC2251836x	45.4737		PI45P4P	58.9979		ADMDC	21.6586
NDPK5m	45.4432		NACUP	58.9406		DKMPPD	21.6586
EX_fol.e.	45.2975		URIt	58.9328		MDRPD	21.6586
r2009	45.2824		URIt4	58.9219		MTAP	21.6586
EX_ala_L.e.	45.2471		RADH3	58.7831		MTRI	21.6586
DADA	45.1369		r1801	58.7808		SPMS	21.6586
CYTK1n	44.8455		r1935	58.6428		EX_glu_L.e.	21.6009
RNMK	44.8379		r1883	58.6098		DURIt	21.5734
PNP	44.8379		EX_fol.e.	58.6056		EX_duri.e.	21.5734
DESAT16_2	44.8378		LYSt4	58.495		PI45P5P	21.3822
r2413	44.8206		r1951	58.4746		PAIL45P_HStn	21.3089
r1772	44.7675		ILEATB0tc	58.2261		TRPt4	21.0908
TYRPHELAT2tc	44.6999		r1799	58.1787		r1721	21.0908
DNDPt63m	44.5605		EX_h2o2.e.	58.1273		r1908	21.0908
DNDPt31m	44.5183		H2O2t	58.1273		DNDPt9m	21.0908
DURIK1m	44.4079		DPMVDc	58.0819		r1639	21.0561
CYTK2n	44.2857		MEVK1c	58.0819		CYTK2n	20.9861
CYTK4	44.2138		PMEVKc	58.0819		EX_leuktrF4.e.	20.9151
r1966	44.1851		NDPK6m	58.0038		LEUKTRF4t	20.9151
CHOLESACATc	44.0151		DHPR2	57.8998		DESAT18_6	20.7636
CHOLESTle	44.0079		r1427	57.783		NDPK1	20.5518
RTOTALt	43.9346		GNDc	57.6846		MGSA	20.4953
EX_xylt.e.	43.9024		r1681	57.6716		r0399	20.4698
XYLTt	43.9024		r1780	57.6606		GLNALANaEx	20.0245
ADA	43.8711		r1904	57.6606		CYTDt4	19.9397
CYTK13	43.8626		DNDPt13m	57.6154		CYTDt	19.923
UMPK7	43.8507		ALAASNNaEx	57.6012		r2425	19.8458
RAI2	43.8282		CYTK2n	57.5521		RTOTALFATPc	19.6159
RETI2	43.8243		r2039	57.5461		CYTK11n	19.1986
r2400	43.7659		r0127	57.441		HIStiDF	18.7304
ASCBSVCTtc	43.7392		EX_asn_L.e.	57.441		PHEtec	18.5055
r2396	43.7254		DNDPt63m	57.4328		EX_gal.e.	18.4779
ARGtiDF	43.6533		CYTK3	57.3666		EX_gln_L.e.	18.4779
EX_uri.e.	43.5999		GLNyLATthc	57.2662		GALK	18.4779
EX_gly.e.	43.5636		r1966	57.2486		GALt1r	18.4779
AMPTASECG	43.4476		PROt2r	57.2328		GMPS2	18.4779
r0129	43.4476		ALAGLNexR	57.1967		r2008	18.4779
PROIMINOtc	43.3441		CYTK11	57.1229		INSK	18.4779
G3PD1	43.3247		UMPK5	57.076		UDPG4E	18.4779
DADNK	43.316		BTNt3i	57.039		ARTFR42	18.4779
PEPCKm	43.286		BTNt2	57.039		MOGAT	18.4779
CITtbm	43.286		r2050	56.926		DADNK	18.4779
DCTPtn	43.2431		GLYOX	56.8268		MMSAD1m	18.447
P5CDm	43.2295		ALCD21_D	56.7405		ARTFR41	18.4052
RE1530M	42.8974		PPDOy	56.7405		RTOT4	18.4052
CYSGLYexR	42.876		GLUDym	56.6141		CYTK2	18.258
r0603	42.8085		CYTK13n	56.5811		PI4P3Kn	18.257
ILEATB0tc	42.8002		ADA	56.414		UNK3	18.2363
CYSTLEUrBATtc	42.6985		CYSSNAT5tc	56.4063		r2044	17.849
ASNPHELAT2tc	42.6877		OIVD1m	56.3771		ORNDC	17.8141
DGSNt	42.3889		LEUTAm	56.3771		ORNtiDF	17.7398
EX_dgsn.e.	42.3889		LEUt5m	56.3771		r1681	17.6827
PUNP4	42.3633		DUTPDPm	56.3508		r1801	17.6827
HEX10	42.2209		URIDK2m	56.3508		r1924	17.6827
NDPK8m	42.175		GLNATB0tc	56.3365		DNDPt33m	17.6827
G6PDA	42.0867		ALAGLYexR	56.2843		DIDPtn	17.6827
UMPK	42.0263		ADAe	56.2501		DITPtn	17.6827
EX_gam.e.	42.0029		r2402	56.1654		NDPK10	17.6827
GAMt1r	42.0029		GLUDxm	56.1604		NDPK10n	17.6827
PROt4	41.887		r1798	56.0759		DNDPt26m	17.6714
G6PDH2r	41.8122		r1707	55.987		PSSA1_hs	17.5299
G6PDH2c	41.8098		R_group_phosphotase_2	55.9798		RE3301C	17.5297
ETOHt	41.7803		CYTK10	55.9789		PCHOLP_hs	17.5259
EX_etoh.e.	41.7803		GLNASNNaEx	55.9142		ADNK4	17.5127
r1949	41.7705		EX_uri.e.	55.8922		XOLEST2HSTDle	17.3247
r1953	41.6505		HIStN1	55.8845		ASNGLNNaEx	17.3247
r2416	41.6212		Htm	55.6295		ADNtm	17.3247
DHPR2	41.5446		ADNK3	55.6103		ADNK1m	17.3247
NDPK5	41.4624		ACTLMO	55.5194		DNADtn	17.3122
HIStiDF	41.4157		HISyLATthc	55.3476		NICRNTtn	17.3122
EX_arg_L.e.	41.3522		DNDPt31m	55.3285		NNATn	17.3122
r1954	41.2853		ADNtm	55.274		SPODMm	17.2774
GLUDym	41.2649		ADNK1m	55.274		r1823	17.0838
CYSPHELAT2tc	41.2595		EX_h.e.	55.2223		CYSGLUexR	17.024
FAOXC12C10x	41.2485		EX_thymd.e.	55.1669		r1830	16.9274
METtec	41.1255		DNDPt16m	55.1402		CYTK9	16.6913
EX_leu_L.e.	41.0741		ACCOAL	55.1243		RTOT2	16.6031
RE2675C	41.0495		r0377	55.0764		NDPK3	16.5645
GLUDxm	41.0198		r2008	55.0628		ARTFR13	16.5326
r1764	41.0071		GLNALANaEx	55.0573		ARTFR207	16.4519
R_group_phosphotase_1	40.8634		CYTK1	55.0325		r2043	16.4007
GTPtn	40.7764		FAOXC6C4m	54.9414		DNDPt61m	16.4007
RE0583C	40.6886		RAI2	54.9398		ARTFR202	16.4007
DESAT18_5	40.6763		RETI2	54.9372		LALDO2x	15.5726
r1826	40.6696		r1692	54.9224		LCADi	15.5429
TTDCAtr	40.6273		EX_Rtotal2.e.	54.8145		MI145PP	15.5429
FACOAL140i	40.6273		DNDPt38m	54.758		MI14P4P	15.5429
ACALDt	40.6095		HISt4	54.5845		OCOAT1m	15.5429
EX_acald.e.	40.6095		r1971	54.5543		PI45PLC	15.5429
CYSGLUexR	40.5594		PPItr	54.4888		PIK5	15.5429
THRD_L	40.3884		PHEtec	54.4745		NDP8	15.5429
PI5P4K	40.3681		NADK	54.4091		FAOXC16080x	15.5429
RE2973C	40.3681		EX_gly.e.	54.3577		ADNK1	15.5404
RE2974C	40.3681		DNDPt4m	54.3116		RE0344C	15.3799
RE3270C	40.3681		ACS	54.2812		UNK2	15.3763
EX_ura.e.	40.364		CSNATm	54.2549		r1732	15.3763
URAt	40.364		ADSL1	54.2073		HISCAT1	15.3763
DNDPt42m	40.3282		ADSS	54.2073		OAADC	15.3763
DNDPt28m	40.311		r1921	54.1982		OCDCAFATPc	15.3763
ALDD2y	40.2932		FAOXC10C8x	54.1767		CLHCO3tex2	15.3763
CYTK11	40.1706		PPAer	54.1143		PRO1x	15.1458
r2011	40.1668		HIStiDF	54.0144		CYTK13n	15.0442
r2041	40.157		OCCOAtm	53.9916		ALAt4	13.8865
DNDPt62m	40.1547		CYSGLUexR	53.7268		HISSNAT5tc	13.7299
MCCCrm	40.1502		ASNPHELAT2tc	53.6611		ARTFR12	12.6703
MGCHrm	40.1502		GMPS2	53.6428		RTOT1	12.5337
PCm	40.1502		NTD9	53.6427		FAOXC180x	12.0655
ACOAD8m	40.1502		G6PDH2c	53.6331		DNDPt29m	12.0557
SBPP1er	40.0399		G6PDH2r	53.6314		STCOAtx	12.0375
SPH1Ptr	40.0399		FAOXC2251836x	53.5319		FAS180COA	11.9948
SPHGNtr	40.0399		r1908	53.5071		UMPK	11.9641
PI4P5K	40.0033		GLNtm	53.1643		DNDPt59m	11.4535
r2024	39.9862		GLUNm	53.1643		DHPR	11.2281
GUAD	39.9656		G3PD2m	53.1224		PI4PLC	10.5837
EX_thymd.e.	39.956		LCAT1e	52.9583		r1778	10.5837
SERALANaEx	39.827		RADH	52.9441		CYSASNNaEx	10.5837
r2016	39.8221		PIK3n	52.9274		SERGLNNaEx	10.5837
r2035	39.751		CYSGLNNaEx	52.905		MI14PP	10.5837
RE2954C	39.7283		r0603	52.8807		MI4PP	10.5837
r1669	39.6654		P5CDm	52.7827		DNDPt11m	10.4841
CYTK13n	39.6527		DNDPt2m	52.7806		r1717	10.2601
PYK	39.6007		r2036	52.7486		r2375	7.71736
NDPK4	39.5911		r2439	52.6615		HEX1	7.69442
r1427	39.5596		VITD3t2	52.6309		r2382	7.69442
PTRCOX1	39.5082		r1771	52.63		DNDPt25m	7.69442
ADSL1	39.495		THYMDt1	52.6211		DNDPt32m	7.69442
ADSS	39.495		r1666	52.6127		ACALDt	2.6894e-17
r1940	39.495		GUAD	52.5962		R_group_phosphotase_2	2.6894e-17
DNDPt30m	39.4677		SERGLNexR	52.4505		ASCBt	2.6894e-17
FOLR2	39.3248		TYRATB0tc	52.3705		CHSTEROLt2	2.6894e-17
r0512	39.3248		ACALDt	52.3284		CHSTEROLt3	2.6894e-17
r1921	39.2887		EX_acald.e.	52.3284		CRNtx	2.6894e-17
EX_ocdca.e.	39.1978		DNDPt28m	52.3031		DMNONCRNt	2.6894e-17
RE0344C	39.1978		r2034	52.2985		ETOHt	2.6894e-17
r2037	38.939		FOLR2	52.2849		EX_acald.e.	2.6894e-17
r2026	38.6825		r0512	52.2849		EX_etoh.e.	2.6894e-17
r0456	38.4523		UNK3	52.2723		EX_lac_L.e.	2.6894e-17
CYTK9	38.4454		TAGHSTDe	52.2309		EX_pyr.e.	2.6894e-17
CHOLESTTDe	38.3933		LALDO2x	52.172		FRDPtc	2.6894e-17
CYTK2	38.204		GLYSNAT5tc	52.1426		FRDPtr	2.6894e-17
RE3347C	38.1438		CYTK4	52.1203		GCHOLAte	2.6894e-17
PROD2	38.1407		DNDPt8m	52.0489		GLACter	2.6894e-17
r1981	38.0496		UMPK	52.0054		GLNLASEer	2.6894e-17
r1050	38.0445		DNDPt39m	51.9718		GLRASE	2.6894e-17
DNDPt1m	38.0386		HEX1	51.8691		GULLACter	2.6894e-17
r2395	37.9941		X3HCO3_NAt	51.8623		L_LACt2r	2.6894e-17
GLNtm	37.9092		EX_ala_L.e.	51.817		L_LACt4r	2.6894e-17
GLUNm	37.9092		CYTDt	51.8129		PE_HSter	2.6894e-17
RADH2	37.8575		CYTDt4	51.807		PYRt2r	2.6894e-17
DNDPt8m	37.6997		OCOAT1m	51.7797		RAI1	2.6894e-17
r2402	37.6939		THMDt4	51.6499		RETI1	2.6894e-17
CYSASNNaEx	37.6605		ACOAHi	51.5942		SUCCtp	2.6894e-17
PPItr	37.6233		UMPK2	51.571		UROLACer	2.6894e-17
ATP1ter	37.5823		NDPK8m	51.5442		RE0830C	2.6894e-17
UMPK5	37.529		r1837	51.4665		RE1709C	2.6894e-17
PPAer	37.51		r1931	51.3307		RE1901R	2.6894e-17
r1722	37.4809		r1899	51.3268		RE2079R	2.6894e-17
GLNCYSNaEx	37.4809		ARTFR204	51.2818		RE2651R	2.6894e-17
THYMDt1	37.4246		EX_ncam.e.	51.2497		RE2655R	2.6894e-17
ASNGLNNaEx	37.4034		r1990	51.2058		RE2658R	2.6894e-17
EX_na1.e.	37.3392		GTHO	51.1523		RE2660C	2.6894e-17
INSt4	37.3118		OAADC	50.9979		RE3050R	2.6894e-17
INSt	37.3111		NADN	50.8343		RE3421R	2.6894e-17
biomass_reaction	37.22		HISSNAT5tc	50.6451		RE3524R	2.6894e-17
r2042	37.2156		LEUtec	50.6184		C9BRxtc	2.6894e-17
P5CRm	37.1807		EX_cys_L.e.	50.5695		GLYSNAT5tc	2.6894e-17
HIStN1	37.1719		ORNtiDF	50.5301		LEUPHELAT2tc	2.6894e-17
r1823	37.1446		RTOT3	50.441		AHCYStd	2.6894e-17
DNDPt7m	37.0939		CYSALANaEx	50.3968		AMETtd	2.6894e-17
ADNK1	36.9719		r2040	50.3888		CHSTEROLtrc	2.6894e-17
GLNtN1	36.942		ACRNtm	50.3773		FRDPtcr	2.6894e-17
SULFOX	36.4008		DNDPt37m	50.3484		PPItm	2.6894e-17
CYTK6	36.221		CYTK7	50.343		GCHOLAt	2.6894e-17
r2044	36.1728		r1725	50.3179		X25HVITD3tin_m	1.21433e-26
SERGLNNaEx	36.1346		DESAT18_5	50.2867		X25HVITD2t	9.78343e-27
DGTPtm	36.0507		RE0583C	50.2687		X3HBCDm	8.60968e-27
ARTFR34	35.9559		r2024	50.0565		X25HVITD3tm	7.14849e-27
PIK3n	35.7901		NDP6	49.9822		X24_25DHVITD3t	6.89294e-27
DATPtn	35.7107		METtec	49.9057		X25HVITD3t	5.53008e-27
Htm	35.6527		ALDD2x	49.9044		X25HVITD2tm	3.48584e-27
P5CR	35.5395		LPS	49.8927		X25HVITD2tin_m	1.70084e-27
r1451	35.486		GTHDH	49.7948		X25HVITD3tin	1.65127e-27
r2408	35.4854		r2038	49.5554		X25HVITD2tin	1.42382e-27
r1673	35.4127		CYTK4n	49.5123		A_MANASEly	5.26149e-29
DNDPt33m	35.3643		r0358	49.4173		r0193	8.93197e-42
UTPtn	35.2616		ARTFR31	49.3876		RTOTALCRNCPT1	3.63981e-42
AMPDA	35.0968		VITD3t	49.177		RTOTALCRNCPT2	3.53216e-42
FAOXC101C8m	35.0232		PROIMINOtc	49.1225		ARTPLM1m	3.53215e-42
ALACYSNaEx	34.9007		UMPK3	49.0792		r0578	2.7741e-44
r1692	34.8965		r1695	49.065		MANtg	1.5185e-44
THRGLYexR	34.8631		CYSATB0tc	49.0319		PCm	1.02066e-44
r1939	34.843		PI4P5K	48.8811		MGCHrm	1.01453e-44
RE3009C	34.5019		NTD7	48.8482		MCCCrm	1.00257e-44
r1830	34.4629		r1946	48.8256		DOLGPP_Uer	8.3745e-45
RTOT3	33.8882		DNDPt40m	48.7117		DOLPMT4_Uer	8.33992e-45
r1734	33.6649		CHOLESTTDe	48.706		UDPDOLPT_U	8.33992e-45
r1400	33.435		r1777	48.6801		RTOTALCRNt	7.67288e-45
R_group_phosphotase_2	33.4179		DNDPt7m	48.6771		RTOTAL3CRNCPT2	1.82727e-45
SERCYSNaEx	33.4139		DNDPt22m	48.5208		RTOTAL3CRNt	1.82348e-45
HISCAT1	33.3248		ALDD2y	48.5133		ARTPLM3m	1.82338e-45
r0142	33.2222		ALAyLATthc	48.2233		C161CPT2	6.41378e-46
EX_din.e.	32.9633		DNDPt26m	48.1229		C161CRNt	6.40874e-46
CYSATB0tc	32.9381		DNDPt62m	48.0232		GLUNm	4.84086e-46
DNDPt29m	32.6251		UMPK4	47.9929		ADSS	1.3009e-46
UMPK6	32.5779		ALAGLNNaEx	47.9334		r0311	7.73008e-47
SERATB0tc	32.48		ADNK4	47.9272		UDPGALt2g	3.1445e-47
DGTPtn	32.4306		r1672	47.9002		TTDCPT2	2.2389e-47
UMPK4	32.3862		TCHOLAte	47.8021		TTDCPT1	2.18441e-47
r1742	32.3054		TCHOLAt	47.8021		PMTCOAFABP1tc	1.93382e-47
MCD	32.2992		r1832	47.7782		SO4tl	1.05318e-47
ARTFR31	32.2382		r2026	47.7274		DNDPt27m	9.41734e-48
PHEtec	32.1844		DNDPt20m	47.7189		DESAT16_2	1.73697e-48
r2019	32.0982		PI4P3Kn	47.6872		ACGAM2E	1.73272e-48
PSDm_hs	32.0355		DNDPt23m	47.6694		ACNMLr	1.68276e-48
PSFLIPm	32.0355		ARTFR11	47.5371		EX_lnlncg.e.	7.15877e-49
RETH2	32.0355		NDPK5	47.5348		LNLNCGt	7.15877e-49
DNDPt18m	31.9873		ARTFR210	47.5189		MCD	4.81104e-49
DNDPt23m	31.9062		ETOHMO	47.5066		STRDNCCPT1	3.55527e-49
r1951	31.8191		EX_gthrd.e.	47.4704		STRDNCCPT2	3.55453e-49
r1639	31.78		PALFATPtc	47.1564		STRDNCCRNt	3.55453e-49
r1994	31.7626		ADPT	47.1458		C180CPT2	2.97294e-49
XOL7AONEtr	31.696		SPODM	47.1072		C180CRNt	2.88116e-49
r1024	31.696		RADH2	47.0903		RTOTAL2CRNt	2.66473e-49
r1787	31.6225		biomass_reaction	46.9984		RTOTAL2CRNCPT2	2.54711e-49
LCAT1e	31.5541		TYRt4	46.9488		ARTPLM2m	2.54711e-49
r2036	31.5186		THRGLNexR	46.8765		DPCOAK	2.52491e-49
THMDt4	31.4947		RTOTALFATPc	46.8275		r0591	2.52491e-49
NTPP9	31.4925		CYTK5	46.7304		AMPtr	1.8391e-49
ARTFR11	31.3934		DHCRD1	46.7094		Htg	1.60925e-49
PI3P3Pn	31.2028		RIBFLVt3	46.6469		MI34PP	7.43056e-50
ARTFR32	31.2028		RIBFLVte	46.6469		MI3PP	7.43056e-50
GLNATB0tc	31.1838		r1790	46.5711		MI134PP	7.43056e-50
r2405	31.1088		r1792	46.5138		MI134PK	7.43056e-50
r1799	31.0494		r0456	46.289		MI1346Ptn	7.43056e-50
TYRt4	30.6583		ADNK1	46.2746		MI1346PKn	7.43056e-50
PIK4	30.6583		CYSGLYexR	46.2521		PAPtg	1.8957e-50
DNDPt59m	30.6177		ARTFR34	46.2208		PAPStg	1.87602e-50
ASNt4	30.5281		ASCBOX	46.2014		H2Otg	1.63444e-50
r0364	30.1929		r1810	46.1938		RTOTAL2CRNCPT1	1.44695e-50
r1824	29.615		r2376	46.1938		DIGALSIDEtl	1.3551e-50
SERGLNexR	29.3834		r2384	46.1938		GLAl	1.3551e-50
r2031	29.3573		RE3245C	46.1771		X3SALATAim	8.79799e-51
ARGSL	29.282		OLEICFATPtc	46.1253		G14T5g	8.31289e-51
ARGSS	29.282		DHPR	46.1034		EX_gchola.e.	7.19068e-51
EX_no.e.	29.282		CYTK8n	45.757		EX_taur.e.	6.83609e-51
NOt	29.282		CYSPHELAT2tc	45.7445		TAURt4_2_r	6.83609e-51
CLHCO3tex2	29.1307		SO4HCOtex	45.5377		CHLPCTD	6.729e-51
r2381	28.8832		r1796	45.535		CHOLK	6.729e-51
THRGLNexR	28.7841		r0142	45.4439		NDP7g	6.62362e-51
NTD9	27.95		HISCAT1	45.3672		PItg	6.44164e-51
r1964	27.949		PSDm_hs	45.2327		UDPGALtg	6.35537e-51
GMPS2	27.8873		PSFLIPm	45.2327		CMPACNAtg	6.33433e-51
r1961	27.865		r2395	45.1511		EX_ksii_core2.e.	6.05225e-51
CYStec	27.7026		DNDPt41m	45.1253		S6T3g	4.70592e-51
r2008	27.4666		DESAT18_6	45.1251		CMPSAS	4.66786e-51
r1695	26.8814		r1965	45.1038		KSII_CORE2t	4.64837e-51
HEX1	26.8803		DUTPDP	45.0727		S6T2g	4.44421e-51
LEUtec	26.8045		RADH4	45.0262		GALtly	4.29878e-51
SPODMm	26.7577		r1882	45.0045		ACNAMlt	3.75112e-51
RETH1	26.7157		DNDPt42m	44.9523		LCYSTCBOXL	3.58287e-51
r0377	26.7011		r1964	44.9397		UAG2EMAi	1.90014e-51
r0145	26.6373		DURIK1m	44.883		MM5cg	1.4984e-51
NTD7	26.6334		INSt4	44.6936		MM6B1bg	1.33952e-51
r1829	26.484		INSt	44.6831		MM7B2g	1.33486e-51
NADK	26.1319		r0399	44.6612		M7MASNBterg	1.33486e-51
r1898	25.9849		r2042	44.5161		MM8Ber	1.31752e-51
NADN	25.8955		EX_retfa.e.	44.5111		MANter	1.28772e-51
NADHtpu	25.3158		DADA	44.3677		MM5ag	1.26519e-51
CYTDt	25.0053		PROt4	44.3471		MM6bg	1.26519e-51
CYTDt4	24.9963		UTPtn	44.2892		MM7Cbg	1.26519e-51
ADNt4	24.9065		r1669	44.2563		M8MASNterg	1.26511e-51
ADNt	24.8803		r2009	44.244		MM8Cg	1.26511e-51
OAADC	24.7004		r1919	44.1066		DPMVDc	7.90079e-52
GLNASNNaEx	24.6157		r0364	43.9805		MEVK1c	7.90079e-52
NADS2	24.3157		DNDPt59m	43.9694		PMEVKc	7.90079e-52
EX_cl.e.	24.0166		r1926	43.946		LNLCCPT1	7.66247e-52
PCHOLHSTDe	23.7687		DNDPt60m	43.9371		LNLCCPT2	7.66247e-52
TRPt4	23.5995		r1828	43.6726		RE0512M	7.66247e-52
r2048	23.4685		r1824	43.6122		RE1516M	7.66247e-52
FAOXC1811603m	23.2168		ARTFR32	43.5363		RE1517M	7.66247e-52
r1782	23.0426		SBTR	43.5235		RE1522M	7.66247e-52
r2407	23.0426		DNDPt29m	43.5165		RE1523M	7.66247e-52
DNDPt39m	22.7461		r2407	43.5096		RE1525M	7.66247e-52
CTPtn	22.6481		SERATB0tc	43.4713		RE1531M	7.66247e-52
GLCMter	22.4085		r2019	43.4519		RE1532M	7.66247e-52
r1899	22.3413		CYSt4	43.4419		CMPACNAtn	6.59166e-52
r1792	22.1452		RDH3a	43.4256		CMPSASn	6.58946e-52
RTOTALFATPc	22.1447		RDH3	43.4255		ACNAMtn	6.58928e-52
r1828	22.0459		ADNt4	43.4053		G14T4g	2.83984e-52
r1789	21.9145		ADNt	43.4048		AG13T3g	2.65986e-52
CYTK1	21.3039		MMSAD1m	43.2067		S6T1g	2.65986e-52
r1965	21.3022		r1911	43.191		UGLCNACtg	2.52976e-52
ILELAT1tc	21.0258		r1984	43.191		S26Tg	1.77318e-52
r2386	20.8718		NDPK1	43.0699		G14Tg	1.77316e-52
THRATB0tc	20.8718		DATPtn	43.0682		S2L2FN2M2MASNt	1.77217e-52
r2375	20.8048		HEX7	42.8964		G14T2g	8.95136e-53
r2425	20.4189		P5CRm	42.7243		G14T3g	8.95136e-53
DNDPt20m	20.2783		r1949	42.6065		N3Tg	8.95136e-53
r1769	20.0156		NDPK8	42.568		AG13T1g	8.39972e-53
r2050	19.682		r1741	42.4604		AG13T2g	8.39972e-53
DNDPt19m	19.3951		r1673	42.4186		CORE2GTg	8.39972e-53
DNDPt61m	19.3951		r0398	42.2662		GALNTg	7.64795e-53
EX_gluala.e.	19.1751		SPODMm	42.2331		S6TASE23ly	7.63035e-53
GTMLTe	19.1751		DGTPtm	42.2262		UGALNACtg	6.43865e-53
FAOXC16080m	18.8418		GTPtn	42.1633		UAG4E	6.3625e-53
PRO1x	18.6771		DNDPt43m	42.0156		UDPtl	5.84997e-53
DNDPt35m	18.5417		ARTFR42	42.0044		KSII_CORE2tly	5.82973e-53
DNDPt11m	18.5384		ILELAT1tc	41.9801		GALASE17ly	5.52362e-53
GLYt4	18.4357		THRPHELAT2tc	41.9328		NACHEX23ly	5.52362e-53
DNDPt12m	18.3241		EX_na1.e.	41.9235		S6TASE22ly	5.52362e-53
FBP	18.2986		EX_cl.e.	41.8971		NAGLCAly	5.46522e-53
DNDPt15m	17.9289		CYSASNNaEx	41.8355		r1299	4.66793e-53
TYRATB0tc	17.714		EX_leu_L.e.	41.8201		r2537	4.66793e-53
ACS	16.731		r1939	41.7758		ARTFR203	4.66793e-53
r2028	16.7249		GTHP	41.7648		NAGA2ly	3.97769e-53
DNDPt32m	16.6443		DNDPt10m	41.7587		Ser_Thrtg	3.97769e-53
DNDPt10m	16.6189		UMPK6	41.7237		UDPACGALtl	3.97769e-53
r2051	16.5517		r1400	41.622		MANtly	3.61258e-53
ALAyLATthc	16.1056		r2433	41.5963		GALASE16ly	3.48438e-53
r1725	16.0453		CLHCO3tex2	41.2794		S23T2g	3.09913e-53
r2034	15.8342		r1941	41.1657		NACHEX25ly	2.71591e-53
ACYP	15.1257		THRD_L	41.129		SIAASE3ly	2.49615e-53
DNDPt9m	15.0826		DNDPt58m	41.1162		GALASE19ly	1.57688e-53
r1796	14.9723		DNDPt6m	41.1154		DOLMANP_Lter	5.91372e-54
SO4HCOtex	10.8955		EX_arg_L.e.	41.1046		DOLPMT3_Ler	5.91372e-54
DNDPt2m	10.8955		r2044	41.0732		S6TASE24ly	5.027e-54
DNDPt36m	10.8161		r2027	41.0656		GLCNACPT_L	2.92136e-54
URIt4	8.74129		GSNt4	40.9771		MI1PS	2.84778e-54
URIt	8.73664		GSNt	40.9734		B_MANNASEly	2.81981e-54
X3HBCDm	3.73285e-26		DNDPt30m	40.9618		AHEXASEly	2.38775e-54
X25HVITD2tin	9.32998e-27		CYTK6	40.8979		DOLPH_Ler	2.15517e-54
X25HVITD2tin_m	8.31024e-27		GLNt4	40.8672		BDMT_L	1.43506e-54
X25HVITD2tm	7.87891e-27		r1936	40.4988		G12MT1_L	1.43506e-54
X25HVITD3tin	5.01686e-27		ARTFR203	40.3261		G13MT_L	1.43506e-54
ACNMLr	4.7548e-27		r1992	40.3244		G16MT_L	1.43506e-54
X25HVITD3t	4.68079e-27		UMPK5n	40.0703		GLCNACT_L	1.43506e-54
ACNAM9PL2	4.25793e-27		DNDPt61m	40.0172		CLS_hs	7.11172e-55
A_MANASEly	3.3245e-27		DNDPt18m	39.9406		SIAASEly	6.44059e-55
ACNAMPH	2.70182e-27		XOLEST2HSTDle	39.9365		GALASE1ly	5.51112e-55
X25HVITD2t	2.55284e-27		INSK	39.9316		DOLPMT_L	4.63752e-55
X25HVITD3tin_m	2.44985e-27		X25HVITD3t	39.8891		DOLP_Lter	4.07847e-55
ACGALK2	2.30223e-27		EX_25hvitd3.e.	39.8891		Asn_X_Ser_Thrtr	3.68508e-55
ACCOACm	2.05211e-27		r1826	39.8658		GASNASEly	3.68508e-55
X25HVITD3tm	1.84521e-27		PIK5n	39.8354		G12MT2_L	3.58335e-55
ACNAMtn	1.68527e-27		r2381	39.8238		MG3er	3.54145e-55
ACCOAtr	1.52452e-27		GF6PTA	39.8225		ENGASEly	3.21781e-55
ACGAM2E	1.30343e-27		CYTK2	39.7866		S2L2N2M2MASNtly	3.2169e-55
ACGAMtly	9.71186e-28		ILEPHELAT2tc	39.7092		EX_trp_L.e.	3.15974e-55
ACGALK	7.55012e-28		DNDPt33m	39.7066		GALASE18ly	1.43095e-55
ACP1_FMN_	7.38584e-28		PRO1x	39.5859		NACHEX24ly	1.43095e-55
ACNAMlt	6.31357e-28		r2035	39.5452		FAOXC2251836m	2.80035e-57
ACGALtly	5.6462e-28		DNDPt9m	39.4926		LNLNCGCPT1	2.76623e-57
ACNAM9PL	4.33411e-28		DESAT16_2	39.4366		LNLNCGCRNt	2.76536e-57
ACGAM6PSi	2.29781e-28		CTPtn	39.1682		LNLNCGCPT2	2.75811e-57
AICART	1.35285e-28		r1910	39.1181		FACOAL1831	2.75606e-57
AHEXASEly	1.12669e-28		RETH1	39.106		C160CPT2	1.32886e-57
AG13T2g	1.04619e-28		ADK1m	39.0402		GDPtg	1.13637e-57
AG13T3g	8.44612e-29		FAOXC16080m	38.9712		GDPFUCtg	1.0641e-57
AG13T1g	4.67878e-29		DNDPt15m	38.875		GMPtg	1.0641e-57
AMANK	7.81643e-30		SERGLNNaEx	38.868		M13N2Tg	1.01296e-57
AMPtp	1.15736e-30		AACOAT	38.8119		M16NTg	1.01208e-57
NADHtru	2.20966e-33		DNDPt1m	38.7029		F6Tg	1.01208e-57
NADtru	2.20966e-33		GLNtN1	38.6943		MAN1PT2	1.01082e-57
EX_his_L.e.	6.771e-34		CYTK12	38.6913		PMANM	1.01082e-57
EX_trp_L.e.	1.554e-34		CYTK9	38.5677		GMAND	1.01062e-57
MI1PS	9.509e-35		FAOXC16080x	38.5458		GFUCS	1.01062e-57
PLA2_2	5.90154e-35		ORNALArBATtc	38.4227		M1316Mg	8.73178e-58
CLS_hs	5.772e-35		r1916	38.394		C160CRNt	2.43536e-58
DTMPK	4.958e-35		RE2675C	38.179		TTDCRNt	1.82258e-58
EX_chsterol.e.	4.218e-35		r1732	38.1699		DESAT18_8	1.23187e-58
C160CPT1	3.01748e-42		MOGAT	38.1079		ARTFR33	1.02787e-60
C160CPT2	3.00859e-42		r1989	38.0034		RE3244C	1.22079e-65
UDPGALt2g	2.05669e-42		TMDK1	37.81		DOLDPP_Ler	5.34738e-66
r0193	1.46954e-43		r2031	37.7871		DOLPMT1_Ler	5.21679e-66
EX_gchola.e.	7.09864e-44		r1817	37.6985		DOLPMT2_Ler	5.21679e-66
DIGALSIDEtl	6.68376e-44		NADS2	37.6949		DOLASNT_Ler	4.6509e-66
GALSIDEtl	6.67284e-44		r1779	37.6765		DOLPGT1_Ler	4.58845e-66
RE2666C	6.67254e-44		NADtm	37.5753		DOLPGT2_Ler	4.58845e-66
IMPC	6.14202e-45		r2046	37.4865		MG1er	4.47779e-66
AIRCr	6.14202e-45		r1823	37.3286		MG2er	4.42219e-66
PRASCS	6.14202e-45		RTOTAL3FATPc	37.2026		RE3243C	3.04957e-66
ADSL2	6.14202e-45		r1723	37.1946		RE3242C	1.01781e-66
r0666	6.14202e-45		NTD1	37.1082		M4MPDOL_Lter	4.71746e-68
GARFT	6.14182e-45		r1690	37.0316		RETNtr2	6.86027e-74
PRAGSr	6.14182e-45		FBP	36.9689		RE2659R	6.86027e-74
PRFGS	6.14182e-45		THRGLNNaEx	36.8883		ACCOACm	0
GLUPRT	6.14182e-45		SERt4	36.8157		ACCOAtr	0
C12DCACT	4.85075e-45		r2375	36.8017		ACGALK	0
C12DCTD	4.85075e-45		r2071	36.7843		ACGALK2	0
FAOXC12DCTc	4.85075e-45		PI45P5Pn	36.6864		ACGALtly	0
FAOXC12DCc	4.85075e-45		r1893	36.515		ACGAM6PSi	0
FAOXC12DCx	4.85075e-45		r1953	36.4766		ACGAMtly	0
r0655	2.64514e-45		r2016	36.1786		ACNAM9PL	0
DNDPt27m	2.39792e-45		r2048	36.1451		ACNAM9PL2	0
C10DCCACT	3.12217e-46		r1841	36.0389		ACNAMPH	0
C10DCc	3.12217e-46		r1749	35.9929		ACP1_FMN_	0
SEBACACT	3.12217e-46		THRGLYexR	35.8838		ACS	0
SEBACIDTD	3.12217e-46		r1822	35.8622		ACYP	0
SEBCOACROT	3.12217e-46		DNDPt11m	35.7899		ADSL1	0
SUBERICACT	2.71985e-46		r1963	35.5928		AICART	0
SUBERCROT	2.71958e-46		r2028	35.3852		ALCD22_D	0
SUBEACTD	2.71941e-46		ALAt4	35.0938		AMANK	0
C8DCc	2.71941e-46		DCTPtn	35.0167		AMPtp	0
SUBERCACT	2.71941e-46		r0853	34.9904		ARACHDtr	0
RE3241C	2.58453e-46		r2386	34.9459		ARTCOAL1	0
RE3242C	2.58385e-46		r1677	34.9064		ARTCOAL2	0
RE3244C	2.58385e-46		r1808	34.8542		ARTCOAL3	0
RE3243C	2.58385e-46		r1717	34.6762		ASNt4	0
GALtly	1.86469e-46		r1903	34.6664		ATP1ter	0
RTOTAL3CRNCPT1	1.58566e-46		r2023	34.6664		AVITE1t	0
RTOTAL3CRNCPT2	1.58566e-46		r1639	34.5721		AVITE2t	0
ARTPLM3m	1.58566e-46		r1825	34.5375		BILDGLCURtr	0
DNDPt25m	4.78324e-47		r2018	34.5167		BILIRUBtr	0
C180CPT2	3.40831e-47		NADHtpu	34.3828		BPNT2	0
C180CRNt	3.30596e-47		SERALANaEx	34.3731		BVITEt	0
EX_tchola.e.	1.24101e-47		r2032	34.0145		C14STRr	0
SO4tl	1.00564e-47		SERGLYexR	33.9917		CBR2	0
DURAD2	8.95056e-48		r1843	33.9834		CEPTC	0
TTDCPT2	3.72347e-48		r1830	33.7121		CHSTEROLt1	0
TTDCRNt	3.38636e-48		NACHORCTL3le	33.6531		CO2ter	0
CHOLK	3.14328e-48		CTPS2	33.4134		CORE5GTg	0
C180CPT1	3.09944e-48		r1934	33.1805		CORE7GTg	0
ELAIDCRNt	2.64496e-48		ARTFR202	32.9522		CORE8GTg	0
PDE1	2.34508e-48		r1720	32.8634		CRNCAR3tp	0
PAPStg	9.53085e-49		r1829	32.8567		CSCPASEly	0
MANtg	9.23413e-49		ALAATB0tc	32.8208		CSDPASEly	0
PAPtg	8.81497e-49		r2041	32.4289		CSEPASEly	0
PPCOACm	8.30672e-49		r1924	32.4283		CSNAT3x	0
TTDCPT1	5.60016e-49		r1940	32.0624		CSNATer	0
EX_oxa.e.	4.77083e-49		NTD11	32.0055		CSPG_Ctly	0
DLNLCGCPT2	4.36948e-49		r2003	31.9808		CSPG_Dtly	0
DLNLCGCRNt	4.36948e-49		SERASNNaEx	31.7555		CSPG_Etly	0
FAOXC2031836m	4.36945e-49		DNDPt25m	31.6363		CTPS1	0
GLAl	4.25041e-49		DNDPt27m	31.563		D3AIBTm	0
Htg	3.76032e-49		DNDPt3m	31.2753		DESAT18_4	0
C160CRNt	2.78695e-49		DGTPtn	31.2413		DESAT18_9	0
GK1m	1.16377e-49		DESAT18_7	31.1288		DESAT24_1	0
AMPtr	1.11604e-49		DNDPt21m	31.1167		DGCHOLte	0
H2Otg	1.09716e-49		DNDPt12m	31.0036		DHCR241r	0
PItg	8.64642e-50		r2055	30.5198		DHCR242r	0
NDP7g	8.49894e-50		r1974	30.4048		DOLGLCP_Uter	0
X3SALAASPm	7.46394e-50		r1806	30.3447		DOPASFt	0
X3SALATAim	7.26156e-50		MCD	30.2948		DOPASULT	0
MANtly	5.93347e-50		GMPR	30.28		DTMPK	0
EX_ksii_core2.e.	5.66801e-50		ALCD22_D	30.2745		EBP1r	0
HDCAter	5.54235e-50		r1920	29.9371		EBP2r	0
Ser_Thrtg	5.32925e-50		ALACYSNaEx	29.6774		EX_2425dhvitd3.e.	0
GALNTg	5.32889e-50		r2030	29.5946		EX_25hvitd3.e.	0
UGALNACtg	5.32739e-50		r2037	29.4067		EX_akg.e.	0
S6T2g	5.13211e-50		ASNGLNNaEx	28.8775		EX_asp_L.e.	0
S6T3g	4.70948e-50		DADNK	28.8732		EX_avite1.e.	0
KSII_CORE2t	4.60078e-50		r1976	28.6584		EX_avite2.e.	0
GSNtm	4.44708e-50		r2051	28.4672		EX_bvite.e.	0
GSNKm	4.44708e-50		r1752	28.4565		EX_chsterol.e.	0
CMPACNAtg	3.46431e-50		DNDPt34m	28.4455		EX_cspg_c.e.	0
CMPACNAtn	3.46198e-50		GLYt4	28.4322		EX_cspg_d.e.	0
CMPSASn	3.46174e-50		r1733	28.2589		EX_cspg_e.e.	0
FAOXC2252053m	3.24594e-50		ME2m	28.0822		EX_dopa.e.	0
FAOXC2051843m	3.24594e-50		PPCOACm	27.8321		EX_dopasf.e.	0
FAOXC2251836m	3.24529e-50		PI5P4Kn	27.5784		EX_fe2.e.	0
LCYSTCBOXL	3.16063e-50		r1769	27.4068		EX_his_L.e.	0
EX_taur.e.	2.67361e-50		PLA2_2	27.1486		EX_hspg.e.	0
TAURt4_2_r	2.67361e-50		r1961	27.1358		EX_ksii_core4.e.	0
UDPGALtg	2.49728e-50		r0028	26.9951		EX_lneldc.e.	0
UDPtl	1.85936e-50		r1772	26.1485		EX_nrpphr.e.	0
NAGA2ly	1.85934e-50		r1915	25.9609		EX_nrpphrsf.e.	0
UDPACGALtl	1.85934e-50		r1929	25.8544		EX_pnto_R.e.	0
UGLCNACtg	1.64054e-50		r1734	25.815		EX_prostge1.e.	0
NAGLCAly	1.58004e-50		PIK4	25.5423		EX_prostge2.e.	0
GALASE19ly	1.57968e-50		DNDPt5m	25.5291		EX_prostgf2.e.	0
GALASE18ly	1.57923e-50		r1722	25.5108		EX_pydam.e.	0
NACHEX24ly	1.57921e-50		r1702	25.2434		EX_pydx.e.	0
KSII_CORE2tly	1.57919e-50		DNDPt36m	25.1524		EX_pydxn.e.	0
NACHEX25ly	1.57919e-50		THRATB0tc	25.0997		EX_sphs1p.e.	0
SIAASE3ly	1.57906e-50		DNDPt57m	25.0139		EX_tchola.e.	0
GALASE16ly	1.57819e-50		r1955	24.9151		EX_tethex3.e.	0
S6TASE24ly	1.57804e-50		r1945	24.5007		EX_tetpent3.e.	0
GALASE17ly	1.57782e-50		r1981	24.4711		EX_thr_L.e.	0
NACHEX23ly	1.57782e-50		r1682	24.3438		EX_vitd3.e.	0
S6TASE22ly	1.57782e-50		PI3P3Pn	24.3372		EX_yvite.e.	0
S6TASE23ly	1.57782e-50		DNDPt35m	24.1969		FACOAL160i	0
SPHINGStl	1.31224e-50		DNDPt14m	24.1144		FACOAL180i	0
EX_sphs1p.e.	1.31222e-50		r1954	24.0876		FACOAL181i	0
SPHS1Pte	1.31222e-50		HISyLATtc	24.0876		FACOAL1821	0
SPHK21c	1.31222e-50		BPNT2	23.7984		FACOAL1822	0
X3SPYRSP	1.05667e-50		r2043	23.4795		FACOAL200	0
X3SALAOX	9.56183e-51		TRPATB0tc	23.4177		FACOAL245_2	0
UAG4E	9.03007e-51		DNDPt19m	23.2321		FACOAL246_1	0
DOLMANP_Lter	6.5189e-51		r0060	22.569		FADH2tru	0
DOLPMT3_Ler	6.5189e-51		r1757	22.5184		FADtru	0
CORE2GTg	6.29195e-51		r1784	22.3465		FAOXC160	0
G14T2g	6.28787e-51		r1751	22.137		FAOXC16080m	0
G14T3g	6.28787e-51		r1900	21.9306		FAOXC16180m	0
G14T4g	6.28787e-51		NDP8	21.346		FAS80COA_L	0
N3Tg	6.28787e-51		RETH2	21.3152		FBP	0
S23T2g	6.28787e-51		PI4P5Kn	21.1668		FBP26	0
S6T1g	5.90946e-51		r1763	20.934		FOLR2	0
G14T5g	4.07733e-51		ARTFR33	20.7358		G6PDH1rer	0
STRDNCCPT2	3.30578e-51		r1986	20.7337		G6PDH2rer	0
STRDNCCRNt	3.30554e-51		r2054	20.7335		GALASE20ly	0
Rtotaltl	1.82647e-51		CYSSERNaEx	20.5623		GALSIDEtl	0
ASAH1	1.6402e-51		r1735	20.5056		GLCAASE1ly	0
GLCNACT_L	1.2042e-51		r1675	19.7639		GLCAASE5ly	0
ARTFR203	1.13854e-51		r2014	19.3678		GLCAASE6ly	0
GLCNACPT_L	7.14254e-52		LCADi	19.1602		GLCAASE7ly	0
PI3P4K	6.87611e-52		r1754	18.7702		GLCMter	0
MG2er	4.69823e-52		SERCYSNaEx	18.3274		GLCNACASE1ly	0
MG3er	4.69765e-52		PIK4n	17.4489		GLCNACASE2ly	0
MM5ag	4.69619e-52		r1726	17.4163		GLCNACASE3ly	0
MM6bg	4.69548e-52		r1898	17.0813		GLCNACASE4ly	0
MM7Cbg	4.69548e-52		ASNALANaEx	16.5335		GLCNACASE5ly	0
M8MASNterg	4.69548e-52		r1696	15.138		GLNt4	0
MM8Cg	4.69548e-52		FACOAL160i	13.9971		GLNtm	0
MG1er	4.66732e-52		r1930	12.6185		GLUTCOADHm	0
MM6B2g	4.54732e-52		r1979	12.3654		GLYC3Ptm	0
MM5cg	4.54596e-52		ACGALK2	1.58782e-26		GLYCtm	0
MM6B1bg	4.54132e-52		X25HVITD3tin	1.10541e-26		GNDer	0
BDMT_L	4.19704e-52		ACP1_FMN_	9.46194e-27		GTHOm	0
G12MT1_L	4.19704e-52		X25HVITD2tin	9.02154e-27		HDCAter	0
G13MT_L	4.19704e-52		X25HVITD2tm	8.8233e-27		HISt4	0
G16MT_L	4.19704e-52		ACNMLr	7.79434e-27		HOMt4	0
GALC	3.43153e-52		X25HVITD3tm	7.57655e-27		HRETNtn	0
DOLASNT_Ler	1.16253e-52		X3HBCDm	7.49026e-27		HS1ly	0
DOLPGT2_Ler	1.1467e-52		X25HVITD3tin_m	7.10583e-27		HS2ly	0
r0360	1.01483e-52		X25HVITD2t	6.92948e-27		HS3ly	0
RTOTAL2CRNCPT1	5.52705e-53		ACNAM9PL	6.72954e-27		HS4ly	0
RTOTAL2CRNCPT2	5.51648e-53		ACNAMlt	6.44623e-27		HSAT1ly	0
ARTPLM2m	5.51648e-53		ACNAM9PL2	5.53568e-27		HSAT2ly	0
S26Tg	4.95672e-53		ACGAM6PSi	4.86885e-27		HSAT3ly	0
S2L2FN2M2MASNt	4.93758e-53		AICART	4.5919e-27		HSAT4ly	0
G14Tg	4.93632e-53		Asn_X_Ser_Thrtr	3.8867e-27		HSPASEly	0
F6Tg	4.82768e-53		X25HVITD2tin_m	3.47403e-27		HSPGtly	0
M13N2Tg	4.82352e-53		ACGALtly	3.33156e-27		HYPOE	0
GMAND	4.82338e-53		ACGALK	3.18646e-27		HYPTROX	0
GFUCS	4.82338e-53		ACCOACm	2.67067e-27		IDOAASE1ly	0
M16NTg	4.82316e-53		ACCOAtr	2.51673e-27		IDOAASE2ly	0
M1316Mg	4.8065e-53		ACGAMtly	2.43825e-27		IDOAASE3ly	0
GDPFUCtg	4.79105e-53		ACGAM2E	2.04533e-27		IDOURtly	0
GMPtg	4.79105e-53		ACNAMtn	1.99192e-27		IMPC	0
GDPtg	4.77425e-53		AG13T1g	1.73862e-27		KAS8	0
RETNtr2	2.0646e-53		AHEXASEly	1.67043e-27		KDNH	0
RE2659R	2.0646e-53		A_MANASEly	1.59839e-27		KSII_CORE4tly	0
r0311	1.79928e-53		AG13T2g	1.48333e-27		LCAT1e	0
PMTCOAFABP1tc	4.49774e-54		AG13T3g	1.41613e-27		LEUt4	0
LNLCt	1.53072e-54		BDMT_L	1.40819e-27		LINKDEG1ly	0
r1257	1.53072e-54		ARTCOAL2	1.33502e-27		LINKDEG3ly	0
r1318	1.53072e-54		ACYP	1.07686e-27		LINKDEG4ly	0
r2511	1.53072e-54		C160CRNt	1.07469e-27		LNELDCt	0
r2513	1.53072e-54		ARACHDtr	1.01368e-27		LNLCt	0
DOLP_Lter	7.65793e-55		CMPACNAtg	9.52845e-28		M13N4Tg	0
DOLPGT1_Ler	7.65793e-55		B_MANNASEly	9.3388e-28		M16N4Tg	0
ENGASEly	7.25298e-55		ACNAMPH	8.42685e-28		M16N6Tg	0
G12MT2_L	6.1328e-55		C160CPT2	8.4199e-28		MCDm	0
DOLPH_Ler	5.22602e-55		CORE5GTg	8.28047e-28		METt4	0
DOLDPP_Ler	5.08476e-55		CLS_hs	8.27739e-28		MI1345PP	0
DOLPMT1_Ler	5.05796e-55		CORE8GTg	6.87327e-28		MI134P4P	0
DOLPMT_L	5.05796e-55		AMANK	6.50961e-28		MI13PP	0
Asn_X_Ser_Thrtr	4.85475e-55		BILIRUBtr	6.30386e-28		MI145PK	0
GASNASEly	4.85475e-55		AMPtp	5.57355e-28		MM6ag	0
S2L2N2M2MASNtly	4.83971e-55		C14STRr	5.53875e-28		MM7Ag	0
DOLPMT2_Ler	4.0983e-55		AVITE2t	5.15202e-28		MM7Cag	0
GALASE1ly	4.09813e-55		CORE7GTg	5.01091e-28		MM8Ag	0
SIAASEly	4.09813e-55		CSCPASEly	4.53644e-28		NACHEX26ly	0
B_MANNASEly	4.09813e-55		AVITE1t	4.47831e-28		NACHEX4ly	0
MANter	1.24789e-55		CMPACNAtn	3.98844e-28		NACHEX5ly	0
MM8Ber	1.22959e-55		BVITEt	3.81186e-28		NACHEX6ly	0
MM7B2g	1.21116e-55		CSPG_Etly	3.55238e-28		NACHEX7ly	0
M7MASNBterg	1.21116e-55		CHSTEROLt1	3.45835e-28		NACHEXA20ly	0
M4MPDOL_Lter	6.12132e-57		CSEPASEly	3.3523e-28		NACHEXA21ly	0
MI34PP	1.09394e-57		DESAT24_1	3.1361e-28		NACHEXA22ly	0
MI3PP	1.09394e-57		DOLPMT2_Ler	2.87872e-28		NACHEXA3ly	0
MI134PP	1.09394e-57		CO2ter	2.78051e-28		NACHEXA4ly	0
MI134PK	1.09394e-57		CMPSASn	2.58598e-28		NACHEXA5ly	0
MI1346Ptn	1.09394e-57		CBR2	2.58137e-28		NACHEXA6ly	0
MI1346PKn	1.09394e-57		CSPG_Dtly	2.5098e-28		NACHEXA7ly	0
STRDNCCPT1	4.8745e-58		CSDPASEly	2.12021e-28		NACHEXA8ly	0
LNLNCACPT1	2.71364e-58		CSPG_Ctly	2.08753e-28		NACUP	0
LNLNCACRNt	1.59756e-58		CSNATer	2.06266e-28		NADHtpu	0
C4DCCACT	1.36697e-59		CORE2GTg	2.01704e-28		NADHtru	0
FAOXC4C4DCc	1.11421e-59		CMPSAS	1.78284e-28		NADtru	0
SUCCCROT	3.67856e-60		DHCR242r	1.73448e-28		NDP6	0
DCSPTN1CPT1	2.42567e-62		ARTCOAL3	1.67816e-28		NDPK4m	0
DCSPTN1CPT2	9.51992e-63		DOLP_Lter	1.67318e-28		NRPPHRSFt	0
FAOXC18480m	5.62646e-63		CRNCAR3tp	1.61817e-28		NRPPHRSULT	0
FAOXC2242046m	1.65039e-63		EBP1r	1.51896e-28		NT5C	0
ADRNCPT2	1.14028e-63		DOLMANP_Lter	1.35029e-28		NTD3	0
C204CPT1	1.04534e-64		DESAT18_4	1.20743e-28		NTD8	0
C204CRNt	7.02748e-65		DGCHOLte	1.16019e-28		NTD9	0
MAN1PT2	3.58873e-89		DOLPMT_L	9.7624e-29		ORETNF	0
PMANM	3.58873e-89		DOLDPP_Ler	9.26622e-29		ORETNF2	0
ARACHDtr	0		DOPASULT	9.25747e-29		ORETNtn	0
ARTCOAL2	0		DOLASNT_Ler	7.84677e-29		ORETNtn2	0
ARTCOAL3	0		D3AIBTm	7.75137e-29		PAN4PP	0
AVITE1t	0		DHCR241r	7.34192e-29		PCRNtc	0
AVITE2t	0		DESAT18_8	6.97328e-29		PDE1	0
BILIRUBtr	0		EBP2r	6.0343e-29		PDX5PO	0
BPNT2	0		DOLPMT3_Ler	5.87638e-29		PDXPP	0
BVITEt	0		DOLPMT1_Ler	5.49796e-29		PEFLIP	0
C14STRr	0		DOLPGT2_Ler	5.10756e-29		PEFLIPm	0
C204CPT2	0		DOPASFt	3.68827e-29		PFK26	0
CBR2	0		DTMPK	3.2753e-29		PGL	0
CEPTC	0		DOLPGT1_Ler	3.08443e-29		PGLer	0
CHLPCTD	0		DOLPH_Ler	2.89833e-29		PHEMEt	0
CHSTEROLt1	0		ENGASEly	2.48282e-29		PHEt4	0
CMPSAS	0		EX_akg.e.	7.17698e-30		PHYQt	0
CO2ter	0		EX_thr_L.e.	2.035e-31		PI345P3P	0
CORE5GTg	0		EX_his_L.e.	5.476e-32		PI345P3Pn	0
CORE7GTg	0		MI1PS	2.7084e-33		PI345P5P	0
CORE8GTg	0		EX_oxa.e.	1.2262e-33		PI34P3Pn	0
CRNCAR3tp	0		EX_trp_L.e.	8.88e-34		PI34P5K	0
CSCPASEly	0		EX_chsterol.e.	4.255e-34		PI34P5Kn	0
CSDPASEly	0		EX_gchola.e.	7.23019e-42		PI3P3Pn	0
CSEPASEly	0		H2Otg	3.59519e-42		PI3P4K	0
CSNATer	0		r0193	8.99325e-43		PI3P4Kn	0
CSPG_Ctly	0		UDPGALt2g	8.17581e-43		PI3P5K	0
CSPG_Dtly	0		M1316Mg	2.24928e-43		PI45P3K	0
CSPG_Etly	0		MM8Cg	2.2467e-43		PI45P4P	0
D3AIBTm	0		MM5ag	2.24662e-43		PI4P3K	0
DESAT18_4	0		M8MASNterg	2.2466e-43		PI4P5Kn	0
DESAT24_1	0		MM7Cbg	2.24651e-43		PI5P3K	0
DGCHOLte	0		MM6bg	2.24633e-43		PI5P4Kn	0
DHCR241r	0		M7MASNBterg	2.24581e-43		PIK3	0
DHCR242r	0		MM7B2g	2.24577e-43		PIK4	0
DOPASFt	0		M13N2Tg	2.24577e-43		PIK4n	0
DOPASULT	0		MM8Ber	2.24422e-43		PIK5n	0
EBP1r	0		MANter	2.24325e-43		PNTK	0
EBP2r	0		MM6B1bg	2.24299e-43		PNTOt5	0
EX_25hvitd3.e.	0		C4DCCACT	8.02957e-44		PPAer	0
EX_akg.e.	0		FAOXC4C4DCc	8.02957e-44		PPAn	0
EX_asp_L.e.	0		SUCCCROT	8.02641e-44		PPAP	0
EX_avite1.e.	0		DURAD2	5.33339e-44		PPDOx	0
EX_avite2.e.	0		r0679	2.39082e-45		PRISTCOAtx	0
EX_bvite.e.	0		MANtly	5.81368e-46		PROSTGE2t	0
EX_cspg_c.e.	0		C12DCACT	3.99176e-46		PROSTGH2t	0
EX_cspg_d.e.	0		FAOXC12DCx	3.99107e-46		PROSTGI2t	0
EX_cspg_e.e.	0		FAOXC12DCTc	3.99002e-46		PSFLIP	0
EX_dopa.e.	0		FAOXC12DCc	3.99002e-46		PYAM5POr	0
EX_dopasf.e.	0		ARGNm	3.07967e-46		PYDAMK	0
EX_fe2.e.	0		UREAtm	3.07948e-46		PYDAMtr	0
EX_hspg.e.	0		COAtl	2.23375e-46		PYDXK	0
EX_ksii_core4.e.	0		Htg	2.23369e-46		PYDXNK	0
EX_nrpphr.e.	0		r1150	2.22257e-46		PYDXNtr	0
EX_nrpphrsf.e.	0		DPCOAtl	2.20409e-46		PYDXPP	0
EX_pnto_R.e.	0		ADSL2	1.21047e-46		PYDXtr	0
EX_prostge1.e.	0		SO4tl	5.67799e-47		PYRt2p	0
EX_prostge2.e.	0		EX_tchola.e.	2.3904e-47		RADH	0
[truncated: 2,230 more rows]

## Sheet: Reactiondifferences
Reactions	21 - 2249		Reactions	21-50		Reactions	2249-50
X3HBCDm	-40.9618		r1666	39.495		r1666	52.6127
X25HVITD2tin	-40.8979		GUAD	39.495		GUAD	52.5962
X25HVITD2tin_m	-40.8672		SERGLNexR	39.4677		SERGLNexR	52.4505
X25HVITD2tm	-40.4988		TYRATB0tc	39.3248		TYRATB0tc	52.3705
X25HVITD3tin	-40.3261		ACALDt	39.3248		ACALDt	52.3284
ACNMLr	-40.3244		EX_acald.e.	39.2887		EX_acald.e.	52.3284
X25HVITD3t	-40.0703		DNDPt28m	39.1978		DNDPt28m	52.3031
ACNAM9PL2	-40.0172		r2034	39.1978		r2034	52.2985
A_MANASEly	-39.9406		FOLR2	38.939		FOLR2	52.2849
ACNAMPH	-39.9365		r0512	38.6825		r0512	52.2849
X25HVITD2t	-39.9316		UNK3	38.4523		UNK3	52.2723
X25HVITD3tin_m	-39.8891		TAGHSTDe	38.4454		TAGHSTDe	52.2309
ACGALK2	-39.8891		LALDO2x	38.3933		LALDO2x	52.172
ACCOACm	-39.8658		GLYSNAT5tc	38.204		GLYSNAT5tc	52.1426
X25HVITD3tm	-39.8354		CYTK4	38.1438		CYTK4	52.1203
ACNAMtn	-39.8238		DNDPt8m	38.1407		DNDPt8m	52.0489
ACCOAtr	-39.8225		UMPK	38.0496		UMPK	52.0054
ACGAM2E	-39.7866		DNDPt39m	38.0445		DNDPt39m	51.9718
ACGAMtly	-39.7092		HEX1	38.0386		HEX1	51.8691
ACGALK	-39.7066		X3HCO3_NAt	37.9941		X3HCO3_NAt	51.8623
ACP1_FMN_	-39.5859		EX_ala_L.e.	37.9092		EX_ala_L.e.	51.817
ACNAMlt	-39.5452		CYTDt	37.9092		CYTDt	51.8129
ACGALtly	-39.4926		CYTDt4	37.8575		CYTDt4	51.807
ACNAM9PL	-39.4366		OCOAT1m	37.6997		OCOAT1m	51.7797
ACGAM6PSi	-39.1682		THMDt4	37.6939		THMDt4	51.6499
AICART	-39.1181		ACOAHi	37.6605		ACOAHi	51.5942
AHEXASEly	-39.106		UMPK2	37.6233		UMPK2	51.571
AG13T2g	-39.0402		NDPK8m	37.5823		NDPK8m	51.5442
AG13T3g	-38.9712		r1837	37.529		r1837	51.4665
AG13T1g	-38.875		r1931	37.51		r1931	51.3307
AMANK	-38.868		r1899	37.4809		r1899	51.3268
AMPtp	-38.8119		ARTFR204	37.4809		ARTFR204	51.2818
NADHtru	-38.7029		EX_ncam.e.	37.4246		EX_ncam.e.	51.2497
NADtru	-38.6943		r1990	37.4034		r1990	51.2058
EX_his_L.e.	-38.6913		GTHO	37.3392		GTHO	51.1523
EX_trp_L.e.	-38.5677		OAADC	37.3118		OAADC	50.9979
MI1PS	-38.5458		NADN	37.3111		NADN	50.8343
PLA2_2	-38.4227		HISSNAT5tc	37.22		HISSNAT5tc	50.6451
CLS_hs	-38.394		LEUtec	37.2156		LEUtec	50.6184
DTMPK	-38.179		EX_cys_L.e.	37.1807		EX_cys_L.e.	50.5695
EX_chsterol.e.	-38.1699		ORNtiDF	37.1719		ORNtiDF	50.5301
C160CPT1	-38.1079		RTOT3	37.1446		RTOT3	50.441
C160CPT2	-38.0034		CYSALANaEx	37.0939		CYSALANaEx	50.3968
UDPGALt2g	-37.81		r2040	36.9719		r2040	50.3888
r0193	-37.7871		ACRNtm	36.942		ACRNtm	50.3773
EX_gchola.e.	-37.6985		DNDPt37m	36.4008		DNDPt37m	50.3484
DIGALSIDEtl	-37.6949		CYTK7	36.221		CYTK7	50.343
GALSIDEtl	-37.6765		r1725	36.1728		r1725	50.3179
RE2666C	-37.5753		DESAT18_5	36.1346		DESAT18_5	50.2867
IMPC	-37.4865		RE0583C	36.0507		RE0583C	50.2687
AIRCr	-37.3286		r2024	35.9559		r2024	50.0565
PRASCS	-37.2026		NDP6	35.7901		NDP6	49.9822
ADSL2	-37.1946		METtec	35.7107		METtec	49.9057
r0666	-37.1082		ALDD2x	35.6527		ALDD2x	49.9044
GARFT	-37.0316		LPS	35.5395		LPS	49.8927
PRAGSr	-36.9689		GTHDH	35.486		GTHDH	49.7948
PRFGS	-36.8883		r2038	35.4854		r2038	49.5554
GLUPRT	-36.8157		CYTK4n	35.4127		CYTK4n	49.5123
C12DCACT	-36.8017		r0358	35.3643		r0358	49.4173
C12DCTD	-36.7843		ARTFR31	35.2616		ARTFR31	49.3876
FAOXC12DCTc	-36.6864		VITD3t	35.0968		VITD3t	49.177
FAOXC12DCc	-36.515		PROIMINOtc	35.0232		PROIMINOtc	49.1225
FAOXC12DCx	-36.4766		UMPK3	34.9007		UMPK3	49.0792
r0655	-36.1786		r1695	34.8965		r1695	49.065
DNDPt27m	-36.1451		CYSATB0tc	34.8631		CYSATB0tc	49.0319
C10DCCACT	-36.0389		PI4P5K	34.843		PI4P5K	48.8811
C10DCc	-35.9929		NTD7	34.5019		NTD7	48.8482
SEBACACT	-35.8838		r1946	34.4629		r1946	48.8256
SEBACIDTD	-35.8622		DNDPt40m	33.8882		DNDPt40m	48.7117
SEBCOACROT	-35.7899		CHOLESTTDe	33.6649		CHOLESTTDe	48.706
SUBERICACT	-35.5928		r1777	33.435		r1777	48.6801
SUBERCROT	-35.3852		DNDPt7m	33.4179		DNDPt7m	48.6771
SUBEACTD	-35.0938		DNDPt22m	33.4139		DNDPt22m	48.5208
C8DCc	-35.0167		ALDD2y	33.3248		ALDD2y	48.5133
SUBERCACT	-34.9904		ALAyLATthc	33.2222		ALAyLATthc	48.2233
RE3241C	-34.9459		DNDPt26m	32.9633		DNDPt26m	48.1229
RE3242C	-34.9064		DNDPt62m	32.9381		DNDPt62m	48.0232
RE3244C	-34.8542		UMPK4	32.6251		UMPK4	47.9929
RE3243C	-34.6762		ALAGLNNaEx	32.5779		ALAGLNNaEx	47.9334
GALtly	-34.6664		ADNK4	32.48		ADNK4	47.9272
RTOTAL3CRNCPT1	-34.6664		r1672	32.4306		r1672	47.9002
RTOTAL3CRNCPT2	-34.5721		TCHOLAte	32.3862		TCHOLAte	47.8021
ARTPLM3m	-34.5375		TCHOLAt	32.3054		TCHOLAt	47.8021
DNDPt25m	-34.5167		r1832	32.2992		r1832	47.7782
C180CPT2	-34.3828		r2026	32.2382		r2026	47.7274
C180CRNt	-34.3731		DNDPt20m	32.1844		DNDPt20m	47.7189
EX_tchola.e.	-34.0145		PI4P3Kn	32.0982		PI4P3Kn	47.6872
SO4tl	-33.9917		DNDPt23m	32.0355		DNDPt23m	47.6694
DURAD2	-33.9834		ARTFR11	32.0355		ARTFR11	47.5371
TTDCPT2	-33.7121		NDPK5	32.0355		NDPK5	47.5348
TTDCRNt	-33.6531		ARTFR210	31.9873		ARTFR210	47.5189
CHOLK	-33.4134		ETOHMO	31.9062		ETOHMO	47.5066
C180CPT1	-33.1805		r2439	31.8967		EX_gthrd.e.	47.4704
ELAIDCRNt	-32.9522		r2036	31.8834		PALFATPtc	47.1564
PDE1	-32.8634		VITD3t2	31.8651		ADPT	47.1458
PAPStg	-32.8567		EX_gthrd.e.	31.8191		SPODM	47.1072
MANtg	-32.8208		r1771	31.8138		RADH2	47.0903
PAPtg	-32.4289		THYMDt1	31.8006		biomass_reaction	46.9984
PPCOACm	-32.4283		PALFATPtc	31.78		TYRt4	46.9488
URIt	-32.2368		ADPT	31.7626		THRGLNexR	46.8765
URIt4	-32.2358		SPODM	31.696		RTOTALFATPc	46.8275
TTDCPT1	-32.0624		RADH2	31.696		CYTK5	46.7304
EX_oxa.e.	-32.0055		biomass_reaction	31.6225		DHCRD1	46.7094
DLNLCGCPT2	-31.9808		TYRt4	31.5541		RIBFLVt3	46.6469
DLNLCGCRNt	-31.7555		THRGLNexR	31.5186		RIBFLVte	46.6469
FAOXC2031836m	-31.6363		RTOTALFATPc	31.4947		r1790	46.5711
GLAl	-31.563		CYTK5	31.4925		r1792	46.5138
Htg	-31.2753		DHCRD1	31.3934		r0456	46.289
C160CRNt	-31.2413		RIBFLVt3	31.2028		ADNK1	46.2746
GK1m	-31.1288		RIBFLVte	31.2028		CYSGLYexR	46.2521
AMPtr	-31.1167		r1790	31.1838		ARTFR34	46.2208
H2Otg	-31.0036		r1792	31.1088		ASCBOX	46.2014
PItg	-30.5198		r0456	31.0494		r1810	46.1938
NDP7g	-30.4048		ADNK1	30.6583		r2376	46.1938
X3SALAASPm	-30.3447		CYSGLYexR	30.6583		r2384	46.1938
X3SALATAim	-30.2948		ARTFR34	30.6177		RE3245C	46.1771
MANtly	-30.28		ASCBOX	30.5281		OLEICFATPtc	46.1253
EX_ksii_core2.e.	-30.2745		r1810	30.1929		DHPR	46.1034
DNDPt36m	-30.2495		r2376	29.615		CYTK8n	45.757
SO4HCOtex	-30.2091		DNDPt2m	29.3926		CYSPHELAT2tc	45.7445
DNDPt2m	-30.1777		r2384	29.3834		SO4HCOtex	45.5377
HDCAter	-29.9371		G3PD2m	29.3818		r1796	45.535
Ser_Thrtg	-29.6774		LCAT1e	29.3723		r0142	45.4439
GALNTg	-29.5946		RE3245C	29.3573		HISCAT1	45.3672
UGALNACtg	-29.4067		OLEICFATPtc	29.282		PSDm_hs	45.2327
S6T2g	-28.8775		DHPR	29.282		PSFLIPm	45.2327
S6T3g	-28.8732		CYTK8n	29.282		r2395	45.1511
KSII_CORE2t	-28.6584		CYSPHELAT2tc	29.282		DNDPt41m	45.1253
GSNtm	-28.4672		RADH	29.2433		DESAT18_6	45.1251
GSNKm	-28.4565		PIK3n	29.2384		r1965	45.1038
CMPACNAtg	-28.4455		P5CDm	29.1813		DUTPDP	45.0727
CMPACNAtn	-28.4322		CYSGLNNaEx	29.1673		r2036	45.0313
CMPSASn	-28.2589		r0603	29.1446		RADH4	45.0262
FAOXC2252053m	-28.0822		SO4HCOtex	29.1307		r1882	45.0045
FAOXC2051843m	-27.8321		r1796	28.8832		r2439	44.967
FAOXC2251836m	-27.5784		r0142	28.7841		DNDPt42m	44.9523
LCYSTCBOXL	-27.4068		GLUNm	28.7581		r1964	44.9397
EX_taur.e.	-27.1486		GLNtm	28.5498		VITD3t2	44.9365
TAURt4_2_r	-27.1358		G6PDH2c	28.0944		r1771	44.9355
UDPGALtg	-26.9951		NTD9	28.0847		THYMDt1	44.9267
UDPtl	-26.1485		r1908	28.0758		DURIK1m	44.883
r1796	-26.1431		FAOXC2251836x	28.0451		INSt4	44.6936
DNDPt9m	-26.0337		G6PDH2r	28.0024		INSt	44.6831
ACYP	-26.0033		HISCAT1	27.95		r0399	44.6612
NAGA2ly	-25.9609		PSDm_hs	27.949		r2042	44.5161
UDPACGALtl	-25.8544		PSFLIPm	27.8873		EX_retfa.e.	44.5111
UGLCNACtg	-25.815		r2395	27.865		DADA	44.3677
NAGLCAly	-25.5423		DNDPt41m	27.7026		PROt4	44.3471
GALASE19ly	-25.5291		GMPS2	27.6165		UTPtn	44.2892
GALASE18ly	-25.5108		ASNPHELAT2tc	27.4798		r1669	44.2563
ALAyLATthc	-25.4906		DESAT18_6	27.4666		r2009	44.244
r2034	-25.3315		r1965	26.8814		r1919	44.1066
NACHEX24ly	-25.2434		DUTPDP	26.8803		r0364	43.9805
r1725	-25.2341		RADH4	26.8045		DNDPt59m	43.9694
KSII_CORE2tly	-25.1524		r1882	26.7577		r1926	43.946
DNDPt32m	-25.1144		DNDPt42m	26.7157		DNDPt60m	43.9371
DNDPt10m	-25.1049		r1964	26.7011		r1828	43.6726
NACHEX25ly	-25.0997		DURIK1m	26.6373		r1824	43.6122
r2051	-25.0704		INSt4	26.6334		ARTFR32	43.5363
ACS	-25.0448		INSt	26.484		SBTR	43.5235
r2028	-25.04		CYSGLUexR	26.4248		DNDPt29m	43.5165
SIAASE3ly	-25.0139		OCCOAtm	26.2705		r2407	43.5096
GALASE16ly	-24.9151		r0399	26.1319		SERATB0tc	43.4713
S6TASE24ly	-24.5007		r2042	25.9849		r2019	43.4519
GALASE17ly	-24.4711		EX_retfa.e.	25.8955		CYSt4	43.4419
NACHEX23ly	-24.3438		DADA	25.3158		RDH3a	43.4256
S6TASE22ly	-24.3372		DNDPt63m	25.2475		RDH3	43.4255
S6TASE23ly	-24.1969		EX_asn_L.e.	25.2337		ADNt4	43.4053
SPHINGStl	-24.1144		CYTK3	25.1754		ADNt	43.4048
TYRATB0tc	-24.1061		r1692	25.1268		MMSAD1m	43.2067
EX_sphs1p.e.	-24.0876		HIStiDF	25.1226		r1911	43.191
SPHS1Pte	-24.0876		GLNyLATthc	25.122		r1984	43.191
DNDPt15m	-23.9067		RETI2	25.1038		NDPK1	43.0699
SPHK21c	-23.7984		r1966	25.0857		DATPtn	43.0682
DNDPt12m	-23.5995		EX_Rtotal2.e.	25.0844		HEX7	42.8964
FBP	-23.5985		DNDPt38m	25.0844		P5CRm	42.7243
GLYt4	-23.4972		HISt4	25.0666		r1949	42.6065
X3SPYRSP	-23.4795		r1971	25.0666		NDPK8	42.568
DNDPt35m	-23.4627		r0127	25.0355		G3PD2m	42.5387
DNDPt11m	-23.4417		PPAer	25.0248		DNDPt2m	42.5206
X3SALAOX	-23.4177		PPItr	25.0165		r1741	42.4604
PRO1x	-23.3385		PROt4	25.0053		r1673	42.4186
FAOXC16080m	-23.3216		UTPtn	24.9963		LCAT1e	42.3746
UAG4E	-23.2321		ACS	24.9918		RADH	42.3603
EX_gluala.e.	-23.058		DNDPt4m	24.9882		PIK3n	42.3437
GTMLTe	-23.0511		CSNATm	24.9877		CYSGLNNaEx	42.3212
DNDPt19m	-23.0235		ADSL1	24.9877		P5CDm	42.2986
DNDPt61m	-22.8711		PROt2r	24.9697		r0603	42.2969
r2050	-22.7785		ALAGLNexR	24.9697		r0398	42.2662
DOLMANP_Lter	-22.569		ADSS	24.9519		SPODMm	42.2331
r1769	-22.5524		r1921	24.9347		DGTPtm	42.2262
DOLPMT3_Ler	-22.5184		FAOXC10C8x	24.9169		GTPtn	42.1633
CORE2GTg	-22.3465		r1669	24.9065		DNDPt43m	42.0156
DNDPt20m	-22.3282		r2009	24.8803		ARTFR42	42.0044
r2425	-22.3054		OIVD1m	24.8736		ILELAT1tc	41.9801
r2386	-22.1982		CYTK11	24.8662		GLUNm	41.9361
THRATB0tc	-22.1965		CYSSNAT5tc	24.8495		THRPHELAT2tc	41.9328
ILELAT1tc	-22.1652		UMPK5	24.8468		EX_na1.e.	41.9235
G14T2g	-22.137		PHEtec	24.8455		EX_cl.e.	41.8971
r2375	-22.0916		BTNt3i	24.838		CYSASNNaEx	41.8355
G14T3g	-21.9306		EX_gly.e.	24.8277		EX_leu_L.e.	41.8201
CYTK1	-21.9028		NADK	24.8252		r1939	41.7758
r1965	-21.8888		ALCD21_D	24.8243		GTHP	41.7648
r1789	-21.4903		r2050	24.8081		DNDPt10m	41.7587
r1828	-21.3593		BTNt2	24.8081		UMPK6	41.7237
G14T4g	-21.346		GLYOX	24.7961		GLNtm	41.7108
N3Tg	-21.3152		LEUt5m	24.7062		r1400	41.622
RTOTALFATPc	-21.2808		r1919	24.7004		r2433	41.5963
r1792	-21.2804		DUTPDPm	24.6807		G6PDH2r	41.5938
S23T2g	-21.1668		LEUTAm	24.6491		G6PDH2c	41.5773
r1899	-21.1006		r2039	24.6257		NTD9	41.5772
GLCMter	-21.0433		GLUDym	24.618		r1908	41.543
S6T1g	-20.934		r0364	24.6157		FAOXC2251836x	41.5372
CTPtn	-20.8231		ADA	24.5638		CLHCO3tex2	41.2794
DNDPt39m	-20.7635		GLNALANaEx	24.5552		r1941	41.1657
G14T5g	-20.7358		CYTK13n	24.5515		THRD_L	41.129
STRDNCCPT2	-20.7337		URIDK2m	24.5382		DNDPt58m	41.1162
STRDNCCRNt	-20.7335		GLNATB0tc	24.4923		DNDPt6m	41.1154
Rtotaltl	-20.5623		PPDOy	24.4922		GMPS2	41.1091
ASAH1	-20.5056		r2008	24.4872		EX_arg_L.e.	41.1046
r1782	-20.4809		r0377	24.485		r2044	41.0732
r2407	-20.4738		ACCOAL	24.471		r2027	41.0656
FAOXC1811603m	-20.3196		CYTK1	24.4628		ASNPHELAT2tc	40.9907
PCHOLHSTDe	-20.1684		EX_uri.e.	24.4458		GSNt4	40.9771
r2048	-20.1438		DNDPt16m	24.4342		GSNt	40.9734
TRPt4	-20.0731		ALAGLYexR	24.4041		DNDPt30m	40.9618
EX_cl.e.	-19.9294		FAOXC6C4m	24.3758		CYTK6	40.8979
GLCNACT_L	-19.7639		ADAe	24.3437		GLNt4	40.8672
NADS2	-19.6537		HIStN1	24.3259		r1936	40.4988
OAADC	-19.4062		EX_thymd.e.	24.321		ARTFR203	40.3261
ARTFR203	-19.3678		r2402	24.3202		r1992	40.3244
GLNASNNaEx	-19.3647		GLUDxm	24.3202		OCCOAtm	40.1051
ADNt	-19.3637		DNDPt59m	24.3157		UMPK5n	40.0703
ADNt4	-19.3498		Htm	24.2965		DNDPt61m	40.0172
CYTDt	-19.3418		RAI2	24.288		CYSGLUexR	39.9969
CYTDt4	-19.2929		r1707	24.2823		DNDPt18m	39.9406
GLCNACPT_L	-19.1602		R_group_phosphotase_2	24.2801		XOLEST2HSTDle	39.9365
NADHtpu	-19.0518		GLNASNNaEx	24.2676		INSK	39.9316
PI3P4K	-18.7702		CYTK10	24.2543		X25HVITD3t	39.8891
NADN	-18.6156		EX_h.e.	24.2356		EX_25hvitd3.e.	39.8891
r1898	-18.5312		ADNK3	24.2199		r1826	39.8658
NADK	-18.5293		r1798	24.2156		PIK5n	39.8354
MG2er	-18.3274		CYTK2n	24.2124		r2381	39.8238
SPODMm	-18.2468		ADNK1m	24.1811		GF6PTA	39.8225
r0145	-18.2457		ACTLMO	24.1501		CYTK2	39.7866
r0377	-18.2387		HISyLATthc	24.1035		ILEPHELAT2tc	39.7092
RETH1	-18.2366		DNDPt31m	24.04		DNDPt33m	39.7066
r1695	-18.2224		r1926	24.0166		PRO1x	39.5859
LEUtec	-18.2217		ADNtm	24.0078		r2035	39.5452
r1829	-18.1991		ALAASNNaEx	24.0049		DNDPt9m	39.4926
HEX1	-18.1923		MGSA2	23.9769		DESAT16_2	39.4366
NTD7	-18.0602		OBDHc	23.9629		r1692	39.3795
r2008	-17.6584		DNDPt13m	23.9396		RETI2	39.3647
MG3er	-17.4489		r1904	23.9314		EX_Rtotal2.e.	39.2716
CYStec	-17.4227		NDPK2	23.9024		DNDPt38m	39.2152
NTD9	-17.4172		CYTK13	23.8934		CTPtn	39.1682
MM5ag	-17.4163		r1780	23.8778		r1910	39.1181
GMPS2	-17.3455		PCHOLHSTDe	23.8639		RETH1	39.106
r1961	-17.2862		NDPK1n	23.8375		HISt4	39.0416
r1964	-17.2837		SERtN1	23.8213		ADK1m	39.0402
MM6bg	-17.0813		PI45P4P	23.8151		r1971	39.0114
ALDD2x	-16.9915		PAFS	23.8126		FAOXC16080m	38.9712
NDPK2	-16.9865		NACUP	23.7846		HIStiDF	38.9703
PAN4PP	-16.9447		DNDPt60m	23.7687		PPAer	38.9685
DNDPt58m	-16.9352		CYTK8	23.7341		DNDPt63m	38.9549
r1825	-16.9217		r1742	23.712		PPItr	38.9459
r0578	-16.9162		PAFH	23.711		EX_asn_L.e.	38.9355
r0591	-16.9136		NACDe	23.6934		DNDPt4m	38.9317
EX_ump.e.	-16.8934		ILEATB0tc	23.6767		PHEtec	38.9316
PYNP2r	-16.8612		URIt	23.6389		ACS	38.9049
RDH1a	-16.8566		URIt4	23.6237		CYTK3	38.8887
ARGSL	-16.8432		r1799	23.6091		CSNATm	38.8786
HMGCOASim	-16.843		r1828	23.5995		DNDPt15m	38.875
LGTHL	-16.8427		RADH3	23.5885		SERGLNNaEx	38.868
ARGSS	-16.8214		RTOTAL2t	23.5776		NADK	38.8662
r2031	-16.8198		CYStec	23.5183		ADSL1	38.831
SERGLNexR	-16.8104		r1951	23.5117		ADSS	38.831
MI14P4P	-16.7981		r1801	23.4783		r1921	38.8219
FATP8t	-16.7814		EX_h2o2.e.	23.4697		EX_gly.e.	38.8172
LGNCt	-16.7768		r1824	23.4685		AACOAT	38.8119
EX_ins.e.	-16.7628		r1427	23.4561		FAOXC10C8x	38.8004
ACACT1rm	-16.7614		LYSt4	23.4556		GLNyLATthc	38.7883
EX_gua.e.	-16.7516		GNDc	23.4393		r1966	38.7707
RDH1	-16.7452		r1681	23.4325		PROt2r	38.7549
FATP6t	-16.7372		H2O2t	23.4275		ALAGLNexR	38.7187
ADRNt	-16.7364		DPMVDc	23.3518		r0127	38.7105
H2CO3D	-16.7241		FACOAL184	23.3295		DNDPt1m	38.7029
HCO3_CLt	-16.7231		ARTCOAL1	23.3031		LEUt5m	38.6944
HCO3_NAt	-16.7214		MEVK1c	23.2995		GLNtN1	38.6943
NMNS	-16.7197		PMEVKc	23.2987		CYTK12	38.6913
DOLGLCP_Uter	-16.7171		ADK1	23.2931		DUTPDPm	38.6682
DOLGPP_Uer	-16.7171		EX_gdp.e.	23.2703		URIDK2m	38.6682
GUAt	-16.7171		NDPK6m	23.27		GLNATB0tc	38.6538
FAOXC2242046x	-16.7102		r1883	23.2645		CYTK11	38.645
PI4P5Kn	-16.7046		EX_fol.e.	23.2645		LEUTAm	38.6373
SERt4	-16.7046		DHPR2	23.2515		CYTK1	38.6319
ATPS4m	-16.6976		r2425	23.2511		GLNALANaEx	38.6054
AGPAT1	-16.6974		r1935	23.2446		ALAGLYexR	38.6017
GPAM_hs	-16.6889		TPI	23.2282		UMPK5	38.5981
SERtN1	-16.6883		ARTFR32	23.2168		CYTK9	38.5677
r2404	-16.6741		SBTR	23.0426		EX_uri.e.	38.5675
DOLPMT4_Uer	-16.6645		DNDPt29m	23.0426		ADAe	38.5674
THRGLNexR	-16.6598		CYTK14	22.8057		OIVD1m	38.5629
UDPDOLPT_U	-16.6577		FAOXC1811603m	22.7929		BTNt3i	38.5611
ARGtm	-16.6546		CATp	22.7838		BTNt2	38.5611
r2381	-16.6518		r2407	22.7461		HIStN1	38.5598
ACS2	-16.6259		r1901	22.741		CYSSNAT5tc	38.5573
UNK2	-16.6202		SERATB0tc	22.6481		FAOXC16080x	38.5458
BDHm	-16.6154		RE3630C	22.5536		FAOXC6C4m	38.5408
ALCD22_D	-16.6097		ARGtiDF	22.5266		RAI2	38.5391
EX_glc.e.	-16.6094		r1024	22.507		r2008	38.5302
ATPH1e	-16.6084		r2019	22.4085		ACCOAL	38.5212
EX_atp.e.	-16.6046		XOL7AONEtr	22.3653		r0377	38.5119
EX_adprbp.e.	-16.6021		CYSt4	22.3413		r2402	38.4828
EX_nadp.e.	-16.6021		r1889	22.3274		GLUDxm	38.4777
BHBt	-16.5929		r1787	22.3206		r1707	38.4571
OXAHCOtex	-16.5901		CYTK5n	22.3094		CYTK10	38.453
r1824	-16.5788		RE3629C	22.2729		R_group_phosphotase_2	38.45
PYRt2m	-16.577		MGSA	22.2035		DNDPt16m	38.4489
SBTle	-16.5713		AMPDA	22.1759		r2050	38.4481
EX_sbt.d.e.	-16.5713		RDH3a	22.1452		ORNALArBATtc	38.4227
LALDO2x	-16.563		RDH3	22.1447		r1798	38.4045
ALADGLNexR	-16.5623		ADNt4	22.0459		GLNASNNaEx	38.4015
BTNt3i	-16.5598		ADNt	21.9145		r1916	38.394
BTNt2	-16.5598		r1907	21.626		GLYOX	38.3798
ASNtN1	-16.5584		EX_lpchol_hs.e.	21.5968		GLUDym	38.3561
SO4OXAtex2	-16.5573		HMGLm	21.3268		r2039	38.3474
ADK1	-16.5534		MMSAD1m	21.3039		PPDOy	38.3352
RDH3	-16.5491		r1911	21.3022		ALCD21_D	38.3352
EX_malt.e.	-16.5416		ICDHy	21.2759		CYTK13n	38.3241
NADPNe	-16.5342		r1764	21.2253		Htm	38.3048
MM7Cbg	-16.5335		PAN4PP	21.0789		ADNK3	38.2856
DIDPtn	-16.5282		r0578	21.0559		EX_thymd.e.	38.2394
BHBtm	-16.5183		r1984	21.0258		ACTLMO	38.2072
EX_bhb.e.	-16.5183		NDPK1	20.8718		EX_h.e.	38.1983
DESAT18_8	-16.5181		DATPtn	20.8718		ADNK1m	38.1902
ILEtec	-16.507		HEX7	20.8048		RE2675C	38.179
RE1447N	-16.5059		r0010	20.4888		ADA	38.1776
EX_leuktrC4.e.	-16.5048		UMPK7	20.4305		r1732	38.1699
LTC4CP	-16.5048		P5CRm	20.4189		MOGAT	38.1079
LEUKTRC4t	-16.5048		r1949	20.2783		HISyLATthc	38.0353
EX_nh4.e.	-16.4997		GND	20.1557		DNDPt31m	38.0163
HISt4	-16.4922		NDPK8	20.0156		r1989	38.0034
PMI1346PH	-16.4874		RE3626M	19.8596		ADNtm	37.9966
ACACt2m	-16.4862		PMI1346PHn	19.859		CYTK2n	37.9362
RAI3	-16.4829		PMI1346PH	19.8561		TMDK1	37.81
RDH4	-16.4829		CO2tm	19.8554		r2031	37.7871
RETI3	-16.4778		TTDCAtr	19.8519		ALAASNNaEx	37.7554
C30CPT1	-16.477		FACOAL140i	19.8251		PAFS	37.7467
EX_no.e.	-16.4749		r2011	19.8161		r1904	37.7209
ALADGLYexR	-16.4743		EX_din.e.	19.8082		CYTK13	37.7038
DITPtn	-16.474		KCC2t	19.7769		r1817	37.6985
NDPK10	-16.474		MI13456Ptn	19.7679		NADS2	37.6949
NDPK10n	-16.474		RE1519M	19.7648		DNDPt13m	37.6924
RDH3a	-16.4712		NDPK5n	19.7488		r1779	37.6765
MMEm	-16.4708		NAt5	19.7436		r1780	37.6361
r0652	-16.4691		PPMI1346Ptn	19.7297		PAFH	37.618
r1449	-16.4686		PYRt2m	19.7265		NDPK1n	37.6142
ATPtm	-16.468		NDPK3	19.7243		NADtm	37.5753
PMI1346PHn	-16.4627		r1154	19.7102		PCHOLHSTDe	37.5624
NOt	-16.4624		ASNATB0tc	19.689		OBDHc	37.5613
NDPK2n	-16.4618		r1741	19.682		CYStec	37.5467
FATP7t	-16.4607		NTD6	19.6682		RTOTAL2t	37.5423
MMCDm	-16.4605		r1254	19.6682		MGSA2	37.5422
CRVNCtr	-16.4568		r1155	19.6669		SERtN1	37.5302
FAS80COA_L	-16.4424		PNP	19.6594		r1742	37.5259
EX_h2o2.e.	-16.4343		HMGCOAtm	19.6594		NDPK2	37.4913
MALT	-16.434		r0145	19.5744		r2046	37.4865
CYTK7	-16.4289		r1464	19.5279		NACDe	37.4513
LRAT2	-16.4289		OCDCAtr	19.4755		EX_gdp.e.	37.3695
ATPtn	-16.4263		FATP3t	19.4515		CYTK8	37.3613
RE1448N	-16.4254		C180CRNt	19.4481		FACOAL184	37.3529
r1690	-16.425		MTHFD	19.425		ADK1	37.3457
PLA2_2e	-16.4248		MTHFD2	19.425		PI45P4P	37.3393
EX_retn.e.	-16.4232		r1827	19.4186		r1823	37.3286
RETNt	-16.4232		DATPtm	19.4087		r2425	37.2985
MI13456Ptn	-16.4226		r1673	19.3951		TPI	37.2854
PAIL45P_HStn	-16.4224		r0398	19.3951		NACUP	37.282
SERGLYexR	-16.4222		LDH_L	19.3845		URIt	37.2742
PI45P4P	-16.4165		r0475	19.3729		URIt4	37.2633
CLHCO3tex2	-16.407		RNMK	19.3676		r1427	37.2312
EX_amp.e.	-16.4056		r2405	19.3623		ARTCOAL1	37.2216
CITRtm	-16.4052		EX_nh4.e.	19.3623		RTOTAL3FATPc	37.2026
ARACHDt2	-16.4018		CYTK10n	19.3623		r1681	37.2017
EX_arachd.e.	-16.4018		r2070	19.3623		r1723	37.1946
NDPK1n	-16.4004		r1451	19.3498		GNDc	37.1893
CYTK5n	-16.3942		C180CPT2	19.348		PMEVKc	37.1668
TCHOLAte	-16.3911		DADAe	19.2744		r1951	37.1657
EX_retinol.e.	-16.3874		PPItm	19.2636		DHPR2	37.1362
DUTPDPm	-16.3868		C180CPT1	19.262		ILEATB0tc	37.1352
URIDK2m	-16.3868		r1050	19.2605		RADH3	37.1244
CRNrtx	-16.384		ALADGLNexR	19.2546		r1801	37.1222
MI1PP	-16.3833		VALt4	19.2544		LYSt4	37.1128
HDCAtr	-16.3822		H2O2tm	19.2468		NTD1	37.1082
NDPK7	-16.3786		FADH2ETC	19.2185		MEVK1c	37.0958
ACCOAL	-16.377		ALADGLYexR	19.2184		NDPK6m	37.0887
CO2tm	-16.3769		RNDR4	19.1973		r1799	37.0879
ARTFR12	-16.3756		NDPK4	19.1973		r1935	37.0418
PPMI1346Ptn	-16.3742		PYK	19.1973		EX_h2o2.e.	37.0365
MALTt1r	-16.3726		L_LACDcm	19.1921		H2O2t	37.0365
EX_adn.e.	-16.3681		EX_hdca.e.	19.1759		r1883	37.0365
H2O2t	-16.362		SPODMm	19.1751		EX_fol.e.	37.0322
PIPLC	-16.3567		DGTPtm	19.1751		r1690	37.0316
DNDPt6m	-16.3559		FAOXC101C8m	19.1638		DPMVDc	37.0259
DNADtn	-16.3533		MI14P4P	19.1514		r1901	36.9743
NICRNTtn	-16.3533		G3PD1	19.1378		FBP	36.9689
FATP1t	-16.3496		O2tm	19.1179		CYTK14	36.9611
EX_pchol_hs.e.	-16.3378		RE2954C	19.1087		FAOXC1811603m	36.9135
r1991	-16.3376		LYStiDF	19.0683		CATp	36.8986
RIBFLVt3	-16.3365		MI1PP	19.0583		THRGLNNaEx	36.8883
AK2LGCHOLt	-16.3343		HEX10	19.0466		SERt4	36.8157
EX_ak2lgchol_hs.e.	-16.3343		PPAn	19.0235		r2375	36.8017
CYSTALArBATtc	-16.3341		GTPtn	18.8418		r2071	36.7843
NTD12	-16.331		CYTK1n	18.8228		r1024	36.7404
NTPP10	-16.331		EX_gmp.e.	18.75		PI45P5Pn	36.6864
TTDCAFATPc	-16.3304		PI4PP	18.7303		RE3630C	36.6549
FAOXC4C2m	-16.3258		ARTFR44	18.7041		ARGtiDF	36.6363
EX_leuktrE4.e.	-16.3258		DNDPt43m	18.6771		XOL7AONEtr	36.5976
LEUKTRE4t	-16.3258		EX_adn.e.	18.6742		r1893	36.515
r2012	-16.3204		EX_ocdca.e.	18.6273		r1787	36.503
TCHOLAt	-16.3165		RE0344C	18.6273		r1889	36.503
O2Stx	-16.3152		GLCt1r	18.6089		r1953	36.4766
CYSSERNaEx	-16.3148		ASNtN1	18.5849		CYTK5n	36.4701
DNDPt14m	-16.3106		r2416	18.5809		AMPDA	36.3881
r1726	-16.3073		ALCD2yf	18.5703		MGSA	36.3845
RIBFLVte	-16.3073		r2410	18.5442		RE3629C	36.3712
GLCt1r	-16.3061		ARTFR42	18.5417		r2016	36.1786
DHPR	-16.3038		ILELAT1tc	18.5384		r2048	36.1451
r1798	-16.3038		r0311	18.5378		r1841	36.0389
GTHDH	-16.2959		MTHGXLt	18.5287		r1749	35.9929
EX_nad.e.	-16.2895		EX_glc.e.	18.5287		THRGLYexR	35.8838
ARTFR41	-16.283		PMTCOAFABP1tc	18.5148		r1822	35.8622
NNATn	-16.2815		PPA	18.5098		r1907	35.8077
MTHFD2m	-16.2775		ACACt2m	18.4826		DNDPt11m	35.7899
MTHFDm	-16.2775		EX_mthgxl.e.	18.4751		EX_lpchol_hs.e.	35.7848
EX_paf_hs.e.	-16.2749		EX_h2o.e.	18.4707		r1963	35.5928
PAFt	-16.2749		THRPHELAT2tc	18.4357		HMGLm	35.5824
ACSm	-16.2742		HMGCOASim	18.4338		r2028	35.3852
RTOT4	-16.274		EX_na1.e.	18.3241		ICDHy	35.2192
SPODMx	-16.2696		NTD1m	18.311		r1764	35.2082
PSSA1_hs	-16.267		r1459	18.2998		PAN4PP	35.2002
EX_cit.e.	-16.2651		EX_cl.e.	18.2986		r0578	35.2002
r1090	-16.2651		ACS2	18.2912		ALAt4	35.0938
DHCRD1	-16.2634		GSNtm	18.2912		DCTPtn	35.0167
r1464	-16.2545		GSNKm	18.2912		r0853	34.9904
GUAPRT	-16.2528		GK1m	18.2753		r2386	34.9459
DTDPtn	-16.2488		GALU	18.2752		r1677	34.9064
BILDGLCURtr	-16.2468		P5CRxm	18.2563		r1808	34.8542
RE3627M	-16.2463		FAOXC183803m	18.2527		r1717	34.6762
ADPT	-16.2453		ILEtec	18.2495		r1903	34.6664
CATp	-16.2416		FAOXC161802m	18.235		r2023	34.6664
ICDHxm	-16.2399		ACTNMO	18.1991		GND	34.6162
PDHm	-16.2388		ACETONEt2	18.1978		UMPK7	34.5998
ICDHyrm	-16.2356		CYTDK1	18.1956		r1639	34.5721
GCCam	-16.235		RNDR3	18.1665		r1825	34.5375
GCCbim	-16.2345		EX_acetone.e.	18.161		r2018	34.5167
GCCcm	-16.2345		FAOXC140	18.1258		r0010	34.4574
RNDR4	-16.2339		r2400	18.1242		NADHtpu	34.3828
THYMDtm	-16.232		P5CR	18.1079		SERALANaEx	34.3731
MMSAD1m	-16.2318		r0310	18.1009		FACOAL140i	34.297
NDPK7n	-16.2307		ASNSERNaEx	18.092		TTDCAtr	34.297
EX_cmp.e.	-16.2302		PDHm	18.0872		EX_din.e.	34.2709
NTD4e	-16.2302		HXPRT	18.0661		RE3626M	34.2644
NADNe	-16.2299		r1679	18.0605		KCC2t	34.253
H2O2tm	-16.2215		GLNCYSNaEx	18.0461		CO2tm	34.2494
RE3628M	-16.221		GALT	18.0394		PMI1346PHn	34.2491
r0584	-16.2207		EX_adp	18.0167		MI13456Ptn	34.2491
ORNt4m	-16.2205		ATPH2e	18.0147		PPMI1346Ptn	34.2491
GGT6	-16.212		GLYCt	18.0075		PMI1346PH	34.2414
MMMm	-16.2058		EX_glyc.e.	17.956		r0145	34.2103
UMPK2n	-16.2053		CYSASNNaEx	17.9289		PYRt2m	34.2056
EX_ttdca.e.	-16.2023		UGLT	17.9215		r1154	34.1971
EX_tag_hs.e.	-16.1886		LNLNCACPT1	17.8426		r1155	34.1971
AMPTASECGe	-16.1824		ACACT1rm	17.8426		ASNATB0tc	34.1838
PItn	-16.1817		r1090	17.8018		NTD6	34.1812
DGK1	-16.1759		LNLNCACRNt	17.8009		r0475	34.1716
PROt2r	-16.1664		LNLNCACPT2	17.7155		NAt5	34.1679
D_LACt2	-16.164		EX_leu_L.e.	17.714		NDPK3	34.1281
EX_lac_D.e.	-16.164		EX_cit.e.	17.6881		PNP	34.1247
GHMT2rm	-16.1585		RDH2	17.365		RE1519M	34.123
RE3301C	-16.1519		r1991	17.2424		r1254	34.1202
DTTPtn	-16.1499		RDH2a	17.2103		NDPK5n	34.1084
PCHOLP_hs	-16.1499		THYMDtm	17.1492		OCDCAtr	34.0949
EX_thr_L.e.	-16.147		VALtec	17.1489		FATP3t	34.0919
EX_leuktrA4.e.	-16.1442		EX_co2.e.	17.1352		C180CRNt	34.0767
LEUKTRA4t	-16.1442		CSND	17.1308		H2O2tm	34.0619
MOGAT	-16.1421		CSNt	17.0871		r1827	34.0594
NTD5m	-16.1412		EX_csn.e.	16.9825		MTHFD	34.0525
TMDK1m	-16.1412		ATPtm	16.9721		MTHFD2	34.0525
IDPtn	-16.1411		CO2t	16.9512		DATPtm	34.0377
MTHFD2	-16.137		EX_adprib.e.	16.8471		r2405	34.0314
ARAB_Lt	-16.1367		ALAtN1	16.843		r1464	34.02
O2Stm	-16.1349		EX_ura.e.	16.7948		r1451	34.0178
RTOT1	-16.1341		URAt	16.7938		r2032	34.0145
ADPRDP	-16.1329		r1939	16.731		r2011	34.0119
DESAT22_1p	-16.1311		GTHP	16.7249		SERGLYexR	33.9917
ADPRIBt	-16.1272		NDPK5m	16.6866		r1050	33.9894
EX_ocdcea.e.	-16.1204		SBTle	16.6503		r1843	33.9834
RE3245C	-16.1204		DNDPt10m	16.6443		C180CPT2	33.9766
ARABR	-16.117		EX_sbt.d.e.	16.6392		EX_nh4.e.	33.9661
XYLUR	-16.1135		UMPK6	16.6189		NDPK4	33.9582
EX_arab_L.e.	-16.1072		EX_ump.e.	16.5871		PYK	33.9519
H2O2tp	-16.1033		r1400	16.5517		CYTK10n	33.9413
ACt2m	-16.1032		ACALDtm	16.5509		RNDR4	33.92
NDPK3n	-16.0977		DGSNtm	16.5449		ALADGLNexR	33.9154
r2055	-16.091		ALDD2xm	16.5445		ALADGLYexR	33.9103
r1435	-16.0885		DGNSKm	16.4847		EX_hdca.e.	33.8983
ITPtn	-16.0867		DGK2m	16.4603		O2tm	33.8983
NDPK9	-16.0867		r0321	16.3466		r2070	33.8975
NDPK9n	-16.0867		r1909	16.1626		C180CPT1	33.8906
EX_pi.e.	-16.0854		NTD4e	16.1475		FAOXC101C8m	33.8732
STRDNCCOAtxc	-16.0839		PAIL_HStn	16.1212		RE2954C	33.8624
MTHFD	-16.082		RE3347C	16.1138		HMGCOAtm	33.8555
DASCBR	-16.082		PROD2	16.1138		L_LACDcm	33.8505
GMPR	-16.0806		EX_cmp.e.	16.1099		LDH_L	33.8311
ADNCYC	-16.0775		r2433	16.1056		RNMK	33.8224
DCMPDA	-16.0732		X3DSPHR	16.0786		DADAe	33.8201
NDPK4n	-16.0723		CLHCO3tex2	16.0453		VALt4	33.8016
ESTRADIOLtr	-16.0665		GCC2cm	15.997		PPItm	33.7921
ESTRONEtr	-16.0665		FOLTle	15.975		FADH2ETC	33.7892
DURIPP	-16.0636		GCC2bim	15.9498		G3PD1	33.7214
r2027	-16.0633		CEPTC	15.9467		r1830	33.7121
CAMPt	-16.0616		SERPT	15.9258		MI1PP	33.7043
EX_camp.e.	-16.0616		CYSTGLUex	15.9192		MI14P4P	33.6828
r0358	-16.059		CYTK11n	15.9132		NACHORCTL3le	33.6531
EX_Rtotal2.e.	-16.0526		FOLt2	15.9132		MTHGXLt	33.5227
H2Otn	-16.0521		CHLPCTD	15.9099		GLCt1r	33.5212
LPCHOLt	-16.0482		GCC2am	15.9029		PMTCOAFABP1tc	33.4971
r0813	-16.0425		NDPK6	15.8911		r2416	33.49
GTHPm	-16.0409		r0652	15.8827		r0311	33.4897
FATP2t	-16.0376		CHOLK	15.8791		ACACt2m	33.4892
LYSATB0tc	-16.0342		r1449	15.8749		EX_mthgxl.e.	33.4691
BILDGLCURt	-16.0335		r1941	15.8342		LYStiDF	33.4517
r0022	-16.0315		EX_ttdca.e.	15.817		HEX10	33.4505
NAt3_1	-16.0261		CAT2p	15.7165		PPAn	33.4445
GTHP	-16.0258		DESAT22_1p	15.705		EX_glc.e.	33.4412
HSD17B7r	-16.024		AMPTASECG	15.6534		EX_h2o.e.	33.4306
GTHS	-16.022		r0129	15.6508		ASNtN1	33.4221
UMPK3n	-16.0195		r0395	15.6431		CTPS2	33.4134
LALDO	-16.0169		ETOHtx	15.6362		HMGCOASim	33.4043
EX_h2o.e.	-16.0162		CITRtm	15.6137		EX_ocdca.e.	33.3879
ACt2r	-16.014		EX_arab_L.e.	15.6065		RE0344C	33.3879
EX_ac.e.	-16.014		EX_orn.e.	15.5944		r0310	33.3755
THBPT4ACAMDASE	-16.0126		LRAT2	15.5915		FAOXC140	33.3238
PHETHPTOX2	-16.0106		r1844	15.5915		FAOXC161802m	33.3113
PAIL_HStn	-16.0077		PI4PLC	15.5915		r1459	33.3056
EX_orn.e.	-16.0073		ORNTArm	15.5846		P5CRxm	33.2856
ORNTArm	-16.0073		RDH1	15.5733		r2400	33.2628
ILETA	-16.0061		ARAB_Lt	15.5525		EX_acetone.e.	33.2432
X3MOPt2im	-16.0061		DNDPt32m	15.5316		EX_gmp.e.	33.2334
RE1520M	-16.0057		ACALDtx	15.5102		CYTDK1	33.2325
OCDCEAtr	-16.0052		ARABR	15.4955		HXPRT	33.231
ORNt3m	-16.0051		RDH1a	15.4921		r2410	33.2212
RE1527M	-16.0033		NAt3_1	15.4756		PPA	33.2184
RE1534M	-16.0033		CYSTLEUrBATtc	15.4751		ACTNMO	33.2135
r0364	-16.0008		ORNt4m	15.4643		ACETONEt2	33.2135
GK1	-15.9993		FAOXC2242046x	15.3992		PI4PP	33.2005
FAOXC80	-15.9993		FAOXC12C10x	15.3939		GALU	33.1991
PRPPS	-15.9979		ETF	15.3939		CYTK1n	33.1934
CERK	-15.9974		ETFQO	15.2975		ILEtec	33.1928
EX_tyr_L.e.	-15.9969		r2409	15.2975		RNDR3	33.186
NDPK6	-15.9965		DCYTt	15.2975		r1934	33.1805
PE_HStm	-15.9938		NTD4	15.2958		ALCD2yf	33.1518
AMETt2m	-15.9899		DCYTD	15.2941		ARTFR44	33.1084
VALATB0tc	-15.9892		CTPS1	15.2941		ASNSERNaEx	33.105
PCFLOPm	-15.989		EX_dcyt.e.	15.2901		EX_adn.e.	33.1018
PETOHMm_hs	-15.989		NMNATn	15.2601		NTD1m	33.0863
THYOXt	-15.9871		DCMPDA	15.2548		r1679	33.0822
GTHO	-15.9851		NADtn	15.2548		FAOXC183803m	33.0686
DESAT18_3	-15.9849		SERDGLNexR	15.244		PDHm	33.0415
CRMPte	-15.9847		TTDCAFATPc	15.2431		ACS2	33.0097
ILEPHELAT2tc	-15.9829		H2CO3D	15.2416		GSNtm	32.9701
ALCD21_D	-15.9814		FAOXC2252053x	15.232		GSNKm	32.9701
EX_crmp_hs.e.	-15.9809		SPHGNtr	15.224		GK1m	32.9701
ABTD	-15.9807		ARTFR41	15.2129		GALT	32.9644
r0475	-15.9744		EX_hco3.e.	15.2118		ARTFR202	32.9522
RNDR2	-15.9737		NMNtn	15.202		P5CR	32.9185
PPDOy	-15.9724		SERDGLYexR	15.1957		GLYCt	32.8836
r2040	-15.9705		RTOT4	15.1953		GLNCYSNaEx	32.8685
PI4PP	-15.9684		RE1530M	15.1932		r1720	32.8634
G3PD2m	-15.9659		ADEt	15.1881		EX_adp	32.8577
LCADi_D	-15.9645		EX_ade.e.	15.1763		r1829	32.8567
ILETAm	-15.9622		SPH1Ptr	15.1582		ATPH2e	32.8555
ILEt5m	-15.9622		EX_amp.e.	15.1521		UGLT	32.847
ALOX5	-15.9605		ADKd	15.1516		EX_glyc.e.	32.8322
ALOX52	-15.9602		ACt2r	15.1296		ALAATB0tc	32.8208
NTD8	-15.9601		EX_ac.e.	15.1296		ACACT1rm	32.5554
FATP9t	-15.9559		THRD_L	15.1257		r1090	32.5393
NRVNCt	-15.9548		EX_pi.e.	15.1199		LNLNCACPT2	32.524
EX_phe_L.e.	-15.9547		ETOHt	15.1194		LNLNCACRNt	32.4707
SBTR	-15.9502		EX_etoh.e.	15.1194		LNLNCACPT1	32.4509
GLUCYS	-15.9484		RNDR1	15.1025		r2041	32.4289
EX_h.e.	-15.9463		EX_leuktrF4.e.	15.1025		r1924	32.4283
EX_cys_L.e.	-15.9436		DNDPt58m	15.0826		EX_cit.e.	32.4255
EX_dad_2.e.	-15.9394		EX_ins.e.	15.0682		RDH2	32.2575
EX_retinol_cis_11.e.	-15.9371		EX_dad_2.e.	15.0605		r1991	32.1851
ALAASNNaEx	-15.9191		LEUKTRF4t	15.0574		RDH2a	32.1032
r1401	-15.9179		FADtm	15.0548		r1940	32.0624
r1989	-15.9144		NTD9e	15.019		EX_co2.e.	32.047
CYTDK1	-15.9092		LALDO	15.0081		NTD11	32.0055
RNDR3	-15.8968		O2t	14.9994		r2003	31.9808
GTPCI	-15.8958		ACOAD10m	14.9994		THYMDtm	31.9446
r1941	-15.8875		r1892	14.9982		VALtec	31.9389
RETH2e	-15.8855		RE3301C	14.9953		ATPtm	31.9353
r2194	-15.8823		EX_o2.e.	14.9851		EX_csn.e.	31.9208
PUNP2	-15.8816		ACONTm	14.9782		CSND	31.9089
H2Otp	-15.8538		EX_Rtotal3.e.	14.973		CSNt	31.9089
C40CPT1	-15.8506		DNDPt6m	14.9723		CO2t	31.8464
DADNt4	-15.8505		NTD5	14.9698		EX_adprib.e.	31.8127
DATPtm	-15.8436		r2387	14.9639		SERASNNaEx	31.7555
ABTti	-15.8424		ACONT	14.9565		ALAtN1	31.7245
EX_abt.e.	-15.8424		RE0830N	14.9561		EX_ura.e.	31.6945
PIK5n	-15.8382		CYSTALArBATtc	14.9531		URAt	31.6945
EX_gsn.e.	-15.834		G5SADrm	14.9422		EX_arab_L.e.	31.673
MGSA2	-15.8314		EX_gln_L.e.	14.9387		r0395	31.6671
r0010	-15.8308		RE2660N	14.9354		ACONT	31.6539
PPA2	-15.8285		PI45P5P	14.9307		r2387	31.6529
PTHPS	-15.8285		EX_tag_hs.e.	14.9286		DNDPt25m	31.6363
ADEt	-15.8253		GTMLTe	14.9222		CITRtm	31.6008
NTD9e	-15.8235		SBPP1er	14.91		DESAT22_1p	31.5873
SPR	-15.8192		DINt	14.9089		NDPK5m	31.5649
EX_hco3.e.	-15.8123		PSSA1_hs	14.8982		EX_Rtotal3.e.	31.5631
MECOALm	-15.8043		ARTFR207	14.8957		DNDPt27m	31.563
OBDHc	-15.7917		PCHOLP_hs	14.8937		ARABR	31.562
r2018	-15.7844		EX_gluala.e.	14.8925		ARAB_Lt	31.5518
GPDDA1	-15.7603		RE1709N	14.838		EX_gln_L.e.	31.5484
TRIOK	-15.7585		H2O2tp	14.8034		EX_sbt.d.e.	31.5401
ACALDtx	-15.7484		URIK1	14.7856		SBTle	31.5375
EX_hdca.e.	-15.7474		EX_dgsn.e.	14.7717		ACONTm	31.5356
FOLt2	-15.7452		RETFAt1	14.7626		ORNTArm	31.5348
LPASE	-15.7434		O2St	14.7249		EX_orn.e.	31.5337
DCYTD	-15.7374		EX_o2s.e.	14.6804		EX_dad_2.e.	31.5317
ACOAD1fm	-15.7301		DGSNt	14.6674		ALDD2xm	31.5291
EX_ade.e.	-15.7286		GCHOLAt	14.6605		EX_ump.e.	31.5242
r1291	-15.716		GPDDA1	14.6458		NTD5	31.5189
ECOAH1m	-15.7129		FAS80COA_L	14.6315		FADtm	31.5166
HACD1m	-15.7129		LPASE	14.6309		ACt2r	31.5165
KHK	-15.709		GCHOLAte	14.6309		EX_ac.e.	31.5165
ITCOAL1m	-15.7033		ARTFR13	14.5863		ACALDtm	31.5164
FBA2	-15.7014		STRDNCt	14.5803		RE2660N	31.5067
r2397	-15.6988		EX_xylt.e.	14.5508		RDH1	31.4924
FAOXC2252053x	-15.6985		XYLTt	14.5401		H2O2tp	31.4917
NP1	-15.6921		CITtam	14.5342		RDH1a	31.4885
CYSGLTH	-15.691		SPODMx	14.5227		AMPTASECG	31.4848
r0391	-15.69		ALAR	14.4989		r0129	31.4848
NICRNS	-15.6884		O2Stx	14.493		r1909	31.48
NTD6	-15.6762		EX_ser_L.e.	14.4929		ARTFR207	31.4727
ASNt4	-15.6733		FATP2t	14.4919		DGSNtm	31.4569
ADKd	-15.6677		EX_strdnc.e.	14.4799		ORNt4m	31.4472
EX_glyc.e.	-15.6666		RTOT2	14.4666		RE1709N	31.4093
GLYCt	-15.6666		EX_ala_D.e.	14.416		RE3347C	31.3532
MECOAS1m	-15.6559		r2412	14.4107		PROD2	31.3528
RNDR1	-15.6539		OCDCEAtr	14.4107		LALDO	31.3457
r1951	-15.6512		PUNP6	14.4054		LRAT2	31.3398
RPI	-15.6452		ACt2m	14.3614		RE0830N	31.3348
X2DR1PP	-15.6408		ASNt4	14.3613		DGK2m	31.3321
EX_chtn.e.	-15.6407		ICDHxm	14.296		DGNSKm	31.331
PSDm_hs	-15.6339		RTOT1	14.2646		NTD9e	31.315
DURIK1	-15.6332		ICDHyrm	14.2557		EX_tag_hs.e.	31.3126
ALCD21_L	-15.6294		RBFK	14.2038		DNDPt3m	31.2753
ALCD22_L	-15.6294		PPAt	14.1756		CTPS1	31.2625
PGMT	-15.6281		ARTFR12	14.1738		NTD4	31.2617
EX_retfa.e.	-15.6252		FMNAT	14.1531		r0321	31.2495
ALR3	-15.6245		MTHFD2m	14.115		DGTPtn	31.2413
DCYTt	-15.6208		NOS1	14.1081		PAIL_HStn	31.2307
EX_dcyt.e.	-15.6208		MTHFDm	14.1005		NTD4e	31.2181
PPA	-15.6163		ACSm	14.1005		ADEt	31.1958
TYRt4	-15.6163		EX_duri.e.	14.1002		EX_ade.e.	31.1958
FOLTle	-15.6133		EX_ribflv.e.	14.0794		DINt	31.1919
CytOxe.	-15.6093		GCCbim	14.0681		CHOLK	31.1854
SOProd	-15.6046		DURIt	14.0622		EX_hco3.e.	31.1823
DNDPt59m	-15.6031		NOS2	14.0584		FOLTle	31.1817
DNDPt23m	-15.6003		PUNP4	14.0376		EX_cmp.e.	31.1805
DRIBt	-15.5945		EX_ppa.e.	14.0069		CHLPCTD	31.1689
PIK4	-15.5939		GCCcm	13.9803		r1844	31.1636
DOLGLCP_Lter	-15.5911		GCCam	13.9113		CEPTC	31.1585
DOLGPP_Ler	-15.5911		HDCAtr	13.7303		CYSTALArBATtc	31.1584
EX_Lcystin.e.	-15.5902		PRPPS	13.7025		SERPT	31.1497
r2019	-15.5889		BHBtm	13.6979		CYSTGLUex	31.1465
ALR2	-15.5888		EX_bhb.e.	13.6965		SPHGNtr	31.1384
CSNATr	-15.5837		BHBt	13.6818		O2t	31.1364
CYTD	-15.575		HYXNt	13.6678		DESAT18_7	31.1288
EX_drib.e.	-15.573		r0911	13.6678		CYTK11n	31.1199
CAT2p	-15.5722		MALTt1r	13.6642		DNDPt21m	31.1167
DOLPMT4_Ler	-15.5718		MALT	13.662		FOLt2	31.1061
UDPDOLPT_L	-15.5718		HCO3_CLt	13.6609		EX_amp.e.	31.0985
X2MCITt	-15.5659		EX_nad.e.	13.6392		GTMLTe	31.0981
EX_2mcit.e.	-15.5659		PIt8	13.6356		EX_o2.e.	31.0827
MCITS	-15.5659		EX_hxan.e.	13.6356		ACOAD10m	31.0815
SERDGLNexR	-15.5641		NADNe	13.6249		EX_gluala.e.	31.059
SERDGLYexR	-15.5641		EX_cytd.e.	13.623		SPH1Ptr	31.0457
PPAn	-15.5501		ILETA	13.6185		EX_dgsn.e.	31.0456
r0013	-15.5491		PHETHPTOX2	13.5923		X3DSPHR	31.0434
r1374	-15.5491		BDHm	13.5804		PI4PLC	31.0138
RE1519M	-15.5461		X3MOPt2im	13.5789		DNDPt12m	31.0036
r1375	-15.5449		DESAT18_9	13.5789		r1892	30.972
PHEtec	-15.5345		ILETAm	13.5788		PSSA1_hs	30.9572
DNDPt18m	-15.5316		ILEt5m	13.5788		PCHOLP_hs	30.957
RE3626M	-15.5213		NTD2e	13.5788		RE3301C	30.9554
NCAMUP	-15.5134		THBPT4ACAMDASE	13.5603		DNDPt32m	30.9532
PSFLIPm	-15.5015		EX_malt.e.	13.5466		GCC2cm	30.9488
RETH2	-15.4993		FATP1t	13.5398		PI45P5P	30.93
EX_nac.e.	-15.4972		TRPt4	13.5382		NDPK6	30.9178
r0527	-15.4972		CYTK7n	13.5354		GCC2bim	30.8976
r1742	-15.4967		PUNP5	13.5347		DGSNt	30.8884
ARTFR31	-15.4892		NTD7e	13.5347		r0652	30.8762
ITCOALm	-15.4835		EX_5fthf.e.	13.4582		r1449	30.8762
MCD	-15.479		r2012	13.4582		GCC2am	30.8506
NTD2e	-15.4717		MMTSADm	13.4045		EX_ttdca.e.	30.8478
DGTPtn	-15.4696		r1538	13.3526		NAt3_1	30.843
DHCRD2	-15.4634		r1721	13.3453		ARTFR13	30.8326
SERATB0tc	-15.4473		FTHFCL	13.3283		STRDNCt	30.8142
MTHFCm	-15.447		HCO3_NAt	13.3188		URIK1	30.8018
PI3P3Pn	-15.4441		X5FTHFt2	13.3107		G5SADrm	30.7927
ARTFR32	-15.4441		r2399	13.3067		SBPP1er	30.7915
C4CRNCPT2	-15.4406		LYStm	13.2806		RTOT2	30.7704
C4tmc	-15.4406		FUMTSULtm	13.2757		CAT2p	30.7375
NTD7e	-15.4398		R_group_phosphotase_1	13.2657		ETOHtx	30.7375
ETOHtx	-15.4224		MALTSULtm	13.2006		RETFAt1	30.735
PUNP3	-15.4217		SPR	13.181		GCHOLAt	30.7221
UMPK4	-15.4159		PPA2	13.1561		EX_strdnc.e.	30.7119
XOL7AONEtr	-15.4112		EX_gal.e.	13.1326		LPASE	30.7083
X10FTHFtm	-15.4098		GALt1r	13.1283		O2St	30.7063
THFtm	-15.4098		UDPG4E	13.1182		GCHOLAte	30.6924
EX_gdp.e.	-15.4085		GTPCI	13.1048		CYSTLEUrBATtc	30.6899
r2405	-15.405		CYTD	13.1037		FAOXC12C10x	30.6877
TRDR	-15.3973		PTHPS	13.0882		GPDDA1	30.6772
LCAT1e	-15.3946		GUAt	13.0728		FAS80COA_L	30.6724
r1024	-15.3943		EX_gua.e.	13.0517		EX_duri.e.	30.6625
GLNATB0tc	-15.3873		DNDPt24m	12.9877		ICDHxm	30.6519
r1994	-15.3832		RE1518M	12.877		ICDHyrm	30.6499
r1639	-15.3763		RE2998M	12.8673		MTHFDm	30.6421
r1787	-15.3758		r1994	12.8539		ACt2m	30.6284
DNDPt29m	-15.3678		MGCHrm	12.8477		EX_o2s.e.	30.624
FATP3t	-15.3675		PCm	12.8401		ETF	30.6211
DESAT18_6	-15.3667		ACOAD8m	12.8132		ETFQO	30.6211
EX_o2.e.	-15.3617		FUMSO4tm	12.7969		DURIt	30.6206
r2036	-15.3579		MALSO4tm	12.7809		r2409	30.6002
PPM	-15.3563		H2Otp	12.766		CITtam	30.5978
UMPK6	-15.3554		MCCCrm	12.759		FATP2t	30.5952
O2t	-15.3549		C30CPT1	12.7466		RTOT1	30.595
r1154	-15.3349		FAOXC4C2m	12.7297		MTHFD2m	30.5894
THMDt4	-15.3327		ARGtm	12.7152		DCYTt	30.575
r1155	-15.3268		PUNP1	12.7151		EX_dcyt.e.	30.575
CSND	-15.3236		r2404	12.698		TTDCAFATPc	30.5698
RDH2a	-15.3173		NTD2	12.6414		r2412	30.5691
ARTFR11	-15.3161		EX_pchol_hs.e.	12.5181		DCYTD	30.5604
RDH2	-15.3063		ADPRIBt	12.4221		PPAt	30.5578
CSNt	-15.3027		ADPRDP	12.3961		PUNP6	30.5553
ETF	-15.2938		VALt5m	12.3853		ALAR	30.5471
EX_leuktrD4.e.	-15.2849		VALTAm	12.3853		EX_ala_D.e.	30.5471
EX_csn.e.	-15.2775		X3MOBt2im	12.1523		FAOXC2242046x	30.542
CYTK8	-15.2747		VALTA	12.1518		ACSm	30.5345
LEUKTRD4t	-15.2663		STRDNCCOAtxc	12.1251		RBFK	30.5296
R_group_phosphotase_2	-15.2592		PLA2_2e	12.0542		RE1530M	30.5281
r2412	-15.2589		LEUKTRD4t	12.024		SPODMx	30.526
NDPK1m	-15.2583		LTD4DP	11.9944		EX_xylt.e.	30.5252
X3DSPHR	-15.2563		EX_leuktrD4.e.	11.9858		XYLTt	30.5252
r1400	-15.2451		ADK3m	11.8814		ARTFR12	30.5234
r1799	-15.2397		UMPK3n	11.8591		r2055	30.5198
EX_asn_L.e.	-15.2394		r1292	11.8577		ASNt4	30.5132
r0127	-15.239		ORNt3m	11.8533		OCDCEAtr	30.4991
NTPP9	-15.2379		PPAm	11.8533		EX_ser_L.e.	30.4986
MALTSULtm	-15.2364		ESTRADIOLtr	11.8389		O2Stx	30.4963
NT5C	-15.2318		ESTRONEtr	11.8307		ACALDtx	30.4816
ACTLMO	-15.2272		HSD17B7r	11.7399		NOS1	30.4806
ETFQO	-15.2272		PCRNtc	11.6305		NOS2	30.4806
r2409	-15.2239		EX_crmp_hs.e.	11.5558		FMNAT	30.4789
FADH2ETC	-15.2206		PI45PLC	11.5535		PUNP4	30.4381
OCDCAtr	-15.2148		CSNAT3x	11.5535		FAOXC2252053x	30.4165
r1717	-15.2118		MI145PP	11.5215		GCCcm	30.4053
FUMTSULtm	-15.2072		EX_ak2lgchol_hs.e.	11.5189		r1974	30.4048
EX_glu_L.e.	-15.2067		EX_paf_hs.e.	11.5189		EX_ppa.e.	30.3826
MALSO4tm	-15.2067		PAFt	11.5056		H2CO3D	30.3681
ADK3m	-15.198		RTOTALt	11.4857		ADKd	30.3588
FUMSO4tm	-15.1929		CERK	11.4763		RNDR1	30.3588
HISCAT1	-15.1885		CRMPte	11.4583		EX_ribflv.e.	30.3537
SERPT	-15.1867		AK2LGCHOLt	11.4519		DCMPDA	30.3507
CSNAT3x	-15.1845		MALSO3tm	11.3437		NMNtn	30.3505
VALtec	-15.1649		FUMSO3tm	11.2805		NMNATn	30.3456
r1702	-15.1613		GALK	11.2441		r1806	30.3447
r1790	-15.1613		EX_arg_L.e.	10.8955		EX_pi.e.	30.3404
EX_din.e.	-15.1596		r2044	10.8955		ARTFR41	30.3277
r0395	-15.1485		EX_gsn.e.	10.8598		EX_ins.e.	30.3046
LTD4DP	-15.1428		r2027	10.8161		MCD	30.2948
XOLEST2te	-15.1386		PUNP3	10.7562		GCCbim	30.2896
M8MASNterg	-15.138		r0391	10.7256		EX_leuktrF4.e.	30.2892
EX_mthgxl.e.	-15.1265		DASCBR	10.6844		LEUKTRF4t	30.2892
ALCD2yf	-15.1149		NP1	10.5674		ETOHt	30.2806
NTD1m	-15.1095		r1401	10.4995		EX_etoh.e.	30.2806
SERCYSNaEx	-15.1069		C40CPT1	10.4941		GMPR	30.28
ACALDtm	-15.1012		PIter	10.4823		RTOT4	30.2792
PCRNtc	-15.096		PItn	10.4728		ALCD22_D	30.2745
LDH_L	-15.0901		ATPtn	10.4373		MALTt1r	30.2663
NDPK1	-15.0855		EX_udp.e.	10.4355		NADtn	30.2662
CYSATB0tc	-15.0851		EX_phe_L.e.	10.4354		MALT	30.2642
AACOAT	-15.0839		EX_Lcystin.e.	10.4353		SERDGLYexR	30.2436
RE3272N	-15.0836		LGTHL	10.4353		PRPPS	30.2367
CYSGLNNaEx	-15.0822		NICRNS	10.4262		SERDGLNexR	30.2326
CITtam	-15.0763		DNADtn	10.407		GCCam	30.132
FAS160COA	-15.0762		TRDR	10.3974		EX_malt.e.	30.1097
NOS1	-15.0706		r0130	10.3945		PIt8	30.0619
NOS2	-15.0706		DCK1n	10.3557		ILETAm	30.0617
L_LACDcm	-15.0685		FAOXC10C8m	10.3386		ILEt5m	30.0617
RTOTAL2FATPc	-15.055		NDPK7n	10.3359		NTD2e	30.0566
CO2t	-15.0479		r1291	10.3271		X3MOPt2im	30.0497
EX_cytd.e.	-15.0446		EX_tyr_L.e.	10.3271		ILETA	30.0473
r1734	-15.0411		STCOAtx	10.3186		FATP1t	30.0467
RADH3	-15.037		FAOXC180x	10.3186		DESAT18_9	30.0394
ALDD2xm	-15.0308		CYSTS	10.316		HYXNt	30.021
X3HCO3_NAt	-15.0294		RE1342C	10.3116		PHETHPTOX2	30.0155
LRAT1	-15.0268		SBTD_D2	10.311		EX_bhb.e.	30.0117
EX_hxan.e.	-15.0217		r2029	10.3099		HDCAtr	29.9998
TPI	-15.021		CRNrtx	10.3061		EX_hxan.e.	29.9889
ORNtiDF	-15.0195		EX_met_L.e.	10.3026		THBPT4ACAMDASE	29.9835
r1971	-15.0156		NDPK8n	10.3002		HCO3_CLt	29.967
HYXNt	-15.0144		CLOHtex2	10.2996		BHBtm	29.963
NDPK5n	-15.013		CYTK9n	10.2984		CYTK7n	29.958
r1292	-15.0114		CYSGLTH	10.2944		r0911	29.9492
CYTK9n	-15.0066		NTD10	10.2931		BHBt	29.9469
DNDPt37m	-15.0057		ECOAH1m	10.2877		EX_5fthf.e.	29.9456
CTPS1	-15.0013		FAS180COA	10.2829		r1920	29.9371
r0142	-15.0011		KHK	10.2818		r2012	29.921
CSNAT2m	-15.0003		X5MTHFt2	10.277		TRPt4	29.9124
NTD1	-14.994		X5MTHFt	10.277		NADNe	29.8794
r1817	-14.994		ACOAD1fm	10.2768		EX_nad.e.	29.8597
INSK	-14.9935		HACD1m	10.2741		PUNP5	29.855
MTHGXLt	-14.9886		TRIOK	10.2741		NTD7e	29.8494
FAOXC10C8x	-14.9863		EX_leuktrE4.e.	10.2715		EX_cytd.e.	29.8287
PUNP5	-14.9846		NMNS	10.2698		BDHm	29.8192
URIK1	-14.9823		FAS160COA	10.2698		FTHFCL	29.7969
PCRNtm	-14.9785		GTHPm	10.2651		X5FTHFt2	29.7969
EX_co2.e.	-14.9714		CYSTGL	10.2555		MMTSADm	29.7919
r1926	-14.9705		r0022	10.2549		r1538	29.7578
CYSSNAT5tc	-14.9656		HEX4	10.2485		LYStm	29.7497
ALAGLNexR	-14.9655		EX_glu_L.e.	10.246		r2399	29.7291
r1936	-14.9648		EX_gam.e.	10.2415		r1721	29.683
LYStm	-14.9632		SOProd	10.2401		ALACYSNaEx	29.6774
DGK2m	-14.9599		ACCOAC	10.2401		r2030	29.5946
VALt4	-14.9543		PTRCOX1	10.2401		HCO3_NAt	29.5823
ADAe	-14.9518		MAN6PI	10.2365		R_group_phosphotase_1	29.5695
r0130	-14.9517		ACACT10m	10.2322		FUMTSULtm	29.5533
RAI1	-14.9478		IMPD	10.2319		MALTSULtm	29.4782
RETFAt2	-14.9478		GAMt1r	10.2254		SPR	29.4263
RTOTAL3FATPc	-14.9433		PUNP2	10.2212		r2037	29.4067
NTD10	-14.9427		DCK2n	10.2168		UDPG4E	29.371
PALFATPtc	-14.9427		r0584	10.2158		EX_gal.e.	29.3682
PI45P5P	-14.9383		CytOxe.	10.2106		GALt1r	29.3682
ICDHy	-14.9371		PCFLOPm	10.1998		PPA2	29.32
RETt	-14.9366		MECOALm	10.1967		PTHPS	29.32
OIVD1m	-14.9255		MECOAS1m	10.1967		GTPCI	29.2688
LEUTAm	-14.9249		RE2974C	10.1963		CYTD	29.2309
LEUt5m	-14.9239		MANt1r	10.1961		GUAt	29.2057
DUDPtn	-14.9125		RE3270C	10.1868		EX_gua.e.	29.1323
DUMPtn	-14.9123		AMETt2m	10.1863		r1994	28.9881
ADK1m	-14.912		PE_HStm	10.1842		FUMSO4tm	28.938
HISSNAT5tc	-14.9118		FATP8t	10.1841		DNDPt24m	28.9361
NDP8	-14.9097		LEUKTRE4t	10.184		PCm	28.9311
DGNSKm	-14.9092		PETOHMm_hs	10.1829		MALSO4tm	28.9221
PUNP7	-14.9083		XOLEST2te	10.1791		RE2998M	28.8893
r0853	-14.9029		NICRNTtn	10.175		RE1518M	28.8822
GSNt4	-14.9009		NNATn	10.175		ASNGLNNaEx	28.8775
GALT	-14.9007		EX_imp.e.	10.1731		DADNK	28.8732
CRNCARtp	-14.9003		LGNCt	10.17		ACOAD8m	28.8507
CSNATp	-14.9003		LCADi_D	10.1669		MGCHrm	28.8367
UGLT	-14.8996		CSNAT2m	10.1655		H2Otp	28.7995
CYTK8n	-14.8971		ECOAH9m	10.1623		C30CPT1	28.7724
GALU	-14.8952		PCRNtm	10.1525		MCCCrm	28.7479
EX_leuktrF4.e.	-14.8929		RE3009C	10.1525		FAOXC4C2m	28.7196
LEUKTRF4t	-14.8925		ADSK	10.1405		PUNP1	28.7121
GSNt	-14.8871		G6PDA	10.1362		r2404	28.6918
r1254	-14.8815		EX_idp.e.	10.1358		ARGtm	28.6699
GLYSNAT5tc	-14.8783		NDP10ex	10.1358		ADPRIBt	28.6689
C181CPT1	-14.8762		r0160	10.129		NTD2	28.6675
C181CPT2	-14.8762		MTHFR3	10.1257		r1976	28.6584
XOLEST2HSTDle	-14.8718		HACD9m	10.123		ADPRDP	28.6268
OCCOAtx	-14.8591		NTD5m	10.1219		VALt5m	28.6198
r1459	-14.854		SULFOX	10.1209		VALTAm	28.6198
ASCBOX	-14.8463		OIVD3m	10.1132		EX_pchol_hs.e.	28.5606
r1467	-14.841		EX_ile_L.e.	10.1124		r2051	28.4672
C181CRNt	-14.8408		EX_man.e.	10.1053		r1752	28.4565
DGSNtm	-14.8373		RPI	10.0991		DNDPt34m	28.4455
ADNK4	-14.8248		EX_arachd.e.	10.0989		GLYt4	28.4322
RTOT3	-14.8235		UMPK2n	10.0989		STRDNCCOAtxc	28.4146
r1801	-14.8225		PI5P4K	10.0989		VALTA	28.3867
OCCOAtm	-14.8224		EX_lnlnca.e.	10.0977		LTD4DP	28.3856
r1931	-14.8217		EX_lac_D.e.	10.0934		X3MOBt2im	28.3822
IMPD	-14.8198		TMDK1m	10.0918		PLA2_2e	28.3707
EX_leuktrB4.e.	-14.8188		NDPK3n	10.0918		LEUKTRD4t	28.3549
PI4P3Kn	-14.8159		FBA2	10.087		r1292	28.3317
FAOXC161802m	-14.8151		LEUATB0tc	10.0862		EX_leuktrD4.e.	28.3167
EX_adprib.e.	-14.8106		NADtru	10.0843		UMPK3n	28.2934
ALAt4	-14.8085		RE1448N	10.0843		r1733	28.2589
r0310	-14.7988		ARACHDt2	10.0781		ADK3m	28.2434
RETHe	-14.798		GHMT2rm	10.0741		ORNt3m	28.2366
RETFA	-14.7967		r1435	10.0741		PPAm	28.21
RETFAt	-14.7967		r2194	10.0723		HSD17B7r	28.1647
PUNP6	-14.7953		HPYRRy	10.066		ESTRADIOLtr	28.1647
ASNATB0tc	-14.79		RE2973C	10.0595		ESTRONEtr	28.1647
LEUKTRB4t	-14.7885		PHEATB0tc	10.0584		PCRNtc	28.1045
EX_cgly.e.	-14.7848		DESAT18_10	10.0572		ME2m	28.0822
GLNALANaEx	-14.7804		PYNP2r	10.0459		PI45PLC	28.0817
FADtm	-14.7781		BPNT	10.0435		CSNAT3x	28.0275
ORNALArBATtc	-14.7753		NADHtru	10.0429		EX_ak2lgchol_hs.e.	28.0237
LTA4H	-14.7721		DADNt4	10.0349		EX_paf_hs.e.	28.0237
EX_ribflv.e.	-14.7608		GLUt2m	10.0319		PAFt	28.0237
DUTPDPn	-14.7606		ADK3	10.0266		MI145PP	28.0136
NDPK6n	-14.7606		PI45P3Kn	10.0254		EX_crmp_hs.e.	27.9576
O2tm	-14.7606		GLYCK2	10.0235		AK2LGCHOLt	27.9567
FMNAT	-14.7546		CSNATp	10.0218		RTOTALt	27.9538
PIt8	-14.7541		THFtm	10.0199		CRMPte	27.8601
ACONT	-14.7538		SADT	10.0177		CERK	27.8533
LNLCCPT1	-14.7375		D_LACt2	10.0165		PPCOACm	27.8321
LNLCCRNt	-14.7375		ATPH1e	10.0123		MALSO3tm	27.651
NAt5	-14.7288		LNLNCAt	10.0105		GALK	27.6122
RBFK	-14.7226		RE1527M	10.0071		FUMSO3tm	27.5879
GND	-14.7225		PI345P5Pn	10.0059		PI5P4Kn	27.5784
RE0830N	-14.7185		EX_atp.e.	9.99883		r1769	27.4068
LNLCCPT2	-14.7128		EX_lnlncg.e.	9.99261		SBTD_D2	27.2975
ATPasel	-14.7115		PUNP7	9.99221		DASCBR	27.2378
DNDPt26m	-14.7093		EX_leuktrB4.e.	9.98428		r0391	27.2315
FTHFCL	-14.7086		LEUKTRB4t	9.98428		EX_gsn.e.	27.1963
ACTNMO	-14.6999		FACOAL1832	9.98202		PUNP3	27.1727
ACETONEt2	-14.6999		RE1520M	9.98008		PLA2_2	27.1486
OCOAT1m	-14.6948		NDPK2n	9.97834		r1961	27.1358
r2387	-14.6919		RE3627M	9.97834		r2029	27.108
RE1709N	-14.6789		CRNCARtp	9.97646		NP1	27.0856
RE2660N	-14.6789		VALATB0tc	9.97485		PYNP2r	27.0373
ALAtN1	-14.677		LYSATB0tc	9.97338		HACD1m	27.0355
EX_gmp.e.	-14.6698		LTA4H	9.97289		ECOAH1m	27.0249
ACRNtm	-14.6691		RE1447N	9.96525		ACOAD1fm	27.0132
FACOAL184	-14.6679		PI34P4Pn	9.95763		r0028	26.9951
RETFAt1	-14.6651		MTHFCm	9.95201		DADNt4	26.9485
Htr	-14.6629		X10FTHFtm	9.95175		NICRNS	26.9445
KCC2t	-14.6608		FAOXC80	9.95034		ATPH1e	26.934
CYSALANaEx	-14.6584		FACOAL1831	9.94776		EX_atp.e.	26.934
COAtp	-14.6546		ARGATB0tc	9.94435		RE2974C	26.9065
X24_25DHVITD3t	-14.646		RE3628M	9.93716		RE3270C	26.9065
r2043	-14.6408		DTTPtn	9.93538		CYSTS	26.8757
CYTK5	-14.6404		NDPK4n	9.93538		CYSTGL	26.8757
ALAGLNNaEx	-14.6359		MI14PP	9.93538		EX_met_L.e.	26.8624
GLNSERNaEx	-14.6291		MI4PP	9.93538		MTHFR3	26.8488
EX_2425dhvitd3.e.	-14.6286		DTDPtn	9.93269		NTD5m	26.8433
EX_vitd3.e.	-14.6286		MTHFC	9.93005		TMDK1m	26.8433
RE1303C	-14.6286		OCCOAtx	9.93005		NDPK7	26.8276
G5SADs	-14.6276		RETFAt2	9.92895		EX_arachd.e.	26.816
GLU5SAtmc	-14.6276		LRAT1	9.92611		PUNP2	26.8141
RE2240C	-14.6193		PGMT	9.91197		NDPK3n	26.8088
FAOXC182806m	-14.6083		NDPK7	9.91134		FATP7t	26.7988
EX_ha.e.	-14.6068		PMTCOAtx	9.90743		ARACHDt2	26.7952
GLCAASE8ly	-14.6068		THYOXt	9.90377		LCADi_D	26.7824
CSNATm	-14.6039		RE1534M	9.90275		UMPK2n	26.7633
GLCAASE9ly	-14.5906		Htr	9.90275		RE2973C	26.757
EX_s2l2fn2m2masn.e.	-14.59		NDP3ex	9.90275		PI5P4K	26.7566
EX_s2l2n2m2masn.e.	-14.5895		ITCOALm	9.89544		CRVNCtr	26.7318
r1778	-14.5856		PAIL45P_HStn	9.88826		PAIL4P_HStn	26.7021
FAOXC16080x	-14.5856		r0502	9.87864		C181CRNt	26.5596
r2032	-14.5836		URATEt	9.86723		C181CPT2	26.5423
X5FTHFt2	-14.5815		EX_drib.e.	9.86647		MINOHPtn	26.5245
ALAATB0tc	-14.579		DRIBt	9.85771		PPMI12346Ptn	26.5245
MGSA	-14.5707		FATP7t	9.85418		Htx	26.5088
EX_hdcea.e.	-14.5693		DURIPP	9.8541		r1467	26.4974
FUCASEe	-14.566		PAIL4P_HStn	9.84095		C181CPT1	26.4974
EX_acetone.e.	-14.5625		LTC4CP	9.84091		GAMt1r	26.4071
r1919	-14.55		LEUKTRC4t	9.84091		EX_gam.e.	26.3836
UMPK3	-14.5472		LPCHOLt	9.84049		SOProd	26.3768
ETOHMO	-14.5458		EX_leuktrC4.e.	9.84049		ACCOAC	26.3571
FACOAL161	-14.5452		CRVNCtr	9.83844		TRDR	26.3534
HDCEAtr	-14.5378		EX_lys_L.e.	9.83581		r0130	26.3493
ARTFR204	-14.5352		BTNDe	9.81644		PTRCOX1	26.3473
DUTPDP	-14.5313		NDPK10n	9.81342		CytOxe.	26.3455
L_LACt2r	-14.5301		RTOTALCRNCPT1	9.81342		EX_udp.e.	26.3447
r2406	-14.5285		RTOTALCRNCPT2	9.81342		r1401	26.3377
DINt	-14.5194		EX_urate.e.	9.81174		C40CPT1	26.3377
L_LACt4r	-14.513		EX_btn.e.	9.8103		PIter	26.333
EX_idp.e.	-14.5072		RTOTALCRNt	9.80243		EX_phe_L.e.	26.3323
NDP10ex	-14.5072		EX_biocyt.e.	9.79935		EX_tyr_L.e.	26.3323
EX_imp.e.	-14.5072		RAI1	9.79923		G6PDA	26.3248
NTD11	-14.4949		X2DR1PP	9.79666		EX_imp.e.	26.3201
r0321	-14.4921		GGT6	9.79356		STCOAtx	26.3033
NADtm	-14.4869		H2Otly	9.79132		FAOXC180x	26.2995
EX_5fthf.e.	-14.4834		X24_25DHVITD3t	9.7779		CYTK9n	26.2963
DNDPt57m	-14.4812		r1467	9.77335		PItn	26.2963
CYTK3	-14.4791		GULN3D	9.77316		RE1342C	26.2924
r1396	-14.4761		ARTPLM1m	9.7711		X5MTHFt2	26.2911
ACOAHi	-14.4719		EX_9_cis_retfa.e.	9.7711		X5MTHFt	26.291
r0398	-14.4702		ITCOAL1m	9.77077		FBA2	26.2893
NADtn	-14.4652		Htx	9.76357		KHK	26.2891
GLCURtly	-14.4638		RE3272N	9.7629		NMNS	26.2824
EX_strdnc.e.	-14.463		C181CPT2	9.76095		TRIOK	26.2814
STRDNCt	-14.463		LNLNCGt	9.75282		FAS160COA	26.2804
r1779	-14.4627		EX_ocdcea.e.	9.75282		FAS180COA	26.2803
r1397	-14.4605		EX_lnlc.e.	9.75282		EX_idp.e.	26.2799
FACOAL160i	-14.4549		NDPK10	9.74747		NDP10ex	26.2799
r1837	-14.452		GLCMter	9.74058		EX_Lcystin.e.	26.2638
TMDK1	-14.4466		r1786	9.7364		PMI12346PHn	26.2561
NTD2	-14.4451		RETt	9.72674		LGTHL	26.2546
DURIt	-14.4313		C181CPT1	9.72066		r1291	26.245
CYTK10n	-14.4276		C181CRNt	9.71687		EX_leuktrE4.e.	26.2361
ARGATB0tc	-14.4262		EX_2425dhvitd3.e.	9.71236		LEUKTRE4t	26.2361
DNDPt41m	-14.4243		EX_4nphsf.e.	9.69973		SADT	26.2297
PAFS	-14.4209		EX_vitd3.e.	9.69797		ADSK	26.2259
CATm	-14.4126		RE1303C	9.69401		BPNT	26.2259
DNDPt13m	-14.4097		LINOFATPtc	9.68161		EX_leuktrB4.e.	26.2145
r2046	-14.4048		DIDPtn	9.68161		LEUKTRB4t	26.2145
ARTFR42	-14.4043		MINOHPtn	9.68155		LTA4H	26.2145
LPS	-14.4039		RE2240C	9.67773		RE1447N	26.2141
r2029	-14.4038		DITPtn	9.6756		TTDCPT2	26.2098
EX_duri.e.	-14.4023		PPMI12346Ptn	9.66794		TTDCRNt	26.2098
LEUATB0tc	-14.3999		DGULND	9.66134		RAI1	26.2048
PHEATB0tc	-14.3999		NCAMUP	9.66129		TTDCPT1	26.2043
ACONTm	-14.394		PGS	9.66026		RETFAt2	26.2038
ADNK3	-14.3901		PROSTGD2t	9.66026		LRAT1	26.201
CYTK11n	-14.3853		EX_4nph.e.	9.65145		EX_drib.e.	26.2007
PAFH	-14.3834		PGDI	9.64994		FAOXC10C8m	26.1924
PUNP1	-14.3706		EX_prostgd2.e.	9.64994		DRIBt	26.192
r1830	-14.3627		ALOX5	9.64186		RE3272N	26.1918
TRPATB0tc	-14.3595		EX_pro_L.e.	9.64163		EX_glu_L.e.	26.1831
GLYOX	-14.3582		LGNCCOAtx	9.64163		NDPK7n	26.1783
P5CR	-14.3532		EX_utp.e.	9.62554		X24_25DHVITD3t	26.1548
HAtly	-14.3528		X4NPHSULT	9.62361		EX_2425dhvitd3.e.	26.1548
NACHEX27ly	-14.351		NADPHtru	9.61496		EX_vitd3.e.	26.1548
RE3009C	-14.3462		NADPtru	9.61496		RE1303C	26.1548
X5MTHFt	-14.3249		GLCURter	9.61229		RE2240C	26.1548
X5MTHFt2	-14.3233		GULNDer	9.61229		GTHPm	26.1506
r1451	-14.3088		GULNter	9.61229		r0022	26.1506
CLOHtex2	-14.2881		UDPGD	9.60769		r1772	26.1485
FAOXC16180m	-14.2671		UDPGNP	9.60358		NADPNe	26.1463
DESAT18_5	-14.2609		SUCD1m	9.59298		FATP8t	26.1444
CYTK14	-14.2556		ARTFR43	9.59298		NDPK8n	26.1426
FAOXC181C161m	-14.255		X4NPHte	9.57488		LGNCt	26.1305
PIter	-14.2549		CATm	9.57281		CLOHtex2	26.1304
PAIL4P_HStn	-14.2544		ALOX52	9.56758		NDPK2n	26.1283
r1826	-14.2528		AKGDm	9.56174		EX_nadp.e.	26.1257
EX_Rtotal3.e.	-14.2526		NTD12	9.55971		CYSGLTH	26.1229
SUCOAS1m	-14.2526		NTPP10	9.55971		r0160	26.114
Htm	-14.2517		EX_s2l2fn2m2masn.e.	9.55923		PMI12346PH	26.1139
RE0583C	-14.2511		EX_s2l2n2m2masn.e.	9.55266		X2DR1PP	26.1073
Htx	-14.2406		FUCASEe	9.55254		ALOX5	26.0673
r1953	-14.234		NDP8ex	9.55248		ALOX52	26.0673
RE3629C	-14.2333		TTDCPT1	9.5497		UNK2	26.0592
RE3630C	-14.2333		EX_retinol_9_cis.e.	9.54792		EX_adprbp.e.	26.0555
CYTK10	-14.2322		RETH1e	9.54715		CRNrtx	26.0535
AKGDm	-14.2303		FAOXC8C6m	9.53791		RE3627M	26.0507
CYSTS	-14.228		DMATTx	9.52583		RE3628M	26.0507
CYSTGL	-14.228		GRTTx	9.52583		PUNP7	26.0448
EX_met_L.e.	-14.228		IPDDIx	9.52583		NTD10	26.0365
UMPK	-14.2238		EX_nac.e.	9.51743		HPYRRy	26.0282
DGTPtm	-14.218		r0527	9.51743		THFtm	26.026
GNDc	-14.2122		COAtp	9.51171		GLYCK2	25.9857
OCD11COACPT1	-14.2107		ENO	9.51171		LPCHOLt	25.9816
OCD11CRNCACT	-14.2107		TTDCPT2	9.5052		CSNAT2m	25.9779
OCD11CRNCPT2	-14.2007		TTDCRNt	9.5052		PCRNtm	25.9779
SUCD1m	-14.2		PMI12346PH	9.50453		r1915	25.9609
ETOHt	-14.1987		EX_nadp.e.	9.49983		r0502	25.9606
G6PDA	-14.1976		PPItx	9.49894		X10FTHFtm	25.9578
OCT11EFATP	-14.1974		X4NPHSFte	9.49761		MTHFCm	25.9412
NMNATn	-14.1961		SUCOAS1m	9.49477		URATEt	25.9405
NMNtn	-14.1958		PFK	9.49357		EX_btn.e.	25.9307
DATPtn	-14.195		NDPK1m	9.49357		IMPD	25.9304
PIK3n	-14.1921		PMI12346PHn	9.49332		LTC4CP	25.9276
PROt4	-14.1888		NADPNe	9.47219		LEUKTRC4t	25.9276
HMGCOAtm	-14.1881		EX_meoh.e.	9.46892		EX_leuktrC4.e.	25.9272
TTDCAtr	-14.1873		H2Oter	9.45677		PAIL45P_HStn	25.9224
r1916	-14.1824		FALDH	9.45377		EX_lys_L.e.	25.9197
DNDPt60m	-14.1817		ELAIDCPT2	9.45355		BTNDe	25.9197
ALAGLYexR	-14.181		UNK2	9.45082		EX_biocyt.e.	25.9197
ALACYSNaEx	-14.1785		EX_adprbp.e.	9.45082		MANt1r	25.8871
HMGLm	-14.1756		EX_lgnc.e.	9.44971		HEX4	25.8817
G6PDH2r	-14.1749		FACOAL240	9.44971		MAN6PI	25.8817
G6PDH2c	-14.1699		DURIK1	9.44243		RE3009C	25.8812
r2437	-14.1693		EX_11_cis_retfa.e.	9.41507		SULFOX	25.8812
R_group_phosphotase_1	-14.1691		ABTti	9.40411		AMETt2m	25.8763
THRGLYexR	-14.1689		EX_abt.e.	9.40411		PE_HStm	25.8763
r1692	-14.1685		ARTPLM3	9.39891		PETOHMm_hs	25.8713
GTPtn	-14.165		EX_gtp.e.	9.39005		r1929	25.8544
EX_gam.e.	-14.1625		SO4CLtex2	9.39005		EX_lac_D.e.	25.8386
NDPK8m	-14.1615		RE0383C	9.39005		EX_urate.e.	25.8286
FAOXC6C4m	-14.1608		EX_lneldc.e.	9.38214		r1734	25.815
GAMt1r	-14.1575		EX_leuktrA4.e.	9.38179		PCFLOPm	25.79
r1538	-14.1554		GUAPRT	9.38055		LNLNCAt	25.7479
SERGLNNaEx	-14.1522		H2Otn	9.37894		MTHFC	25.7344
r2044	-14.1451		FAOXC200180x	9.37546		ARGATB0tc	25.7288
r1672	-14.1443		ABTD	9.36282		EX_man.e.	25.7187
EX_etoh.e.	-14.1339		PSt3	9.34861		PMTCOAtx	25.6991
FACOAL140i	-14.1308		FAOXC240200x	9.34515		FACOAL1832	25.6981
HEX10	-14.13		METATB0tc	9.33269		GHMT2rm	25.6949
UTPtn	-14.126		LEUKTRA4t	9.3321		r1435	25.6949
ACACT1x	-14.1257		EX_ps_hs.e.	9.3321		EX_lnlnca.e.	25.6864
r0463	-14.1257		ACACT1x	9.32652		CSNATp	25.6512
CYTK6	-14.1221		FAOXC2051843x	9.32592		ADK3	25.6511
r1949	-14.1217		r0463	9.31962		D_LACt2	25.6417
SPODM	-14.1213		r2401	9.31888		r2194	25.6364
NDPK6m	-14.1206		FTHFL	9.30636		DESAT18_10	25.6322
DNDPt38m	-14.1148		DIGALSIDEtl	9.29053		NADtru	25.6304
PI4PLC	-14.1096		GALSIDEtl	9.29053		CRNCARtp	25.6059
GF6PTA	-14.1012		GALtly	9.29053		RE1448N	25.6056
ARTFR34	-14.1005		FATP9t	9.28337		NADHtru	25.5879
r1673	-14.0996		XYLTD_Dr	9.28337		OCCOAtx	25.586
FAOXC101C8m	-14.0993		LNELDCt	9.27294		GLUt2m	25.582
HISyLATtc	-14.0991		GLAl	9.266		RE1527M	25.5789
r1832	-14.0983		EX_retinol_cis_11.e.	9.26006		RE1534M	25.5789
THRD_L	-14.0861		XYLK	9.25352		PI45P3Kn	25.5746
AMPDA	-14.0802		RE2666C	9.25145		Htr	25.5705
DNDPt8m	-14.08		AMPtr	9.25145		VALATB0tc	25.566
r2408	-14.07		C4CRNCPT2	9.25145		LYSATB0tc	25.5645
DHPR2	-14.0657		C4tmc	9.25145		NDP3ex	25.5566
r1986	-14.0573		RETHe	9.25145		PI345P5Pn	25.5551
NDPK5	-14.057		RETFA	9.25145		RE1520M	25.5519
DNDPt33m	-14.053		SFGTH	9.24524		PIK4	25.5423
r1681	-14.0526		MMEm	9.2429		DNDPt5m	25.5291
r1764	-14.0502		RETH2e	9.23211		r1722	25.5108
EX_leu_L.e.	-14.0502		MEOHt2	9.22884		DURIPP	25.4948
UMPK2	-14.0474		MMMm	9.22457		THYOXt	25.4679
GLUDxm	-14.043		FACOAL1822	9.21771		GULN3D	25.3895
PI5P4K	-14.041		GK1	9.2165		NDP8ex	25.2826
r1939	-14.0381		LNLCCPT1	9.21205		NTD12	25.2726
RADH4	-14.0284		NRVNCt	9.20547		NTPP10	25.2726
RE2675C	-14.0269		RETFAt	9.19449		DGULND	25.2659
r2054	-14.0235		MMCDm	9.1768		EX_4nphsf.e.	25.2656
METtec	-14.0147		HIBDm	9.17251		EX_utp.e.	25.2536
GLUDym	-14.0091		LNLCCPT2	9.16895		r1702	25.2434
r2416	-14.0083		NDP7ex	9.15926		EX_4nph.e.	25.2173
MM8Cg	-13.9971		G5SDym	9.15546		UDPGNP	25.2128
RE2973C	-13.9896		FAOXC182806m	9.13673		UDPGD	25.1807
r1954	-13.9888		ELAIDCPT1	9.13114		COAtp	25.1525
DGSNt	-13.9882		LNLCCRNt	9.12924		DNDPt36m	25.1524
EX_dgsn.e.	-13.9882		GLU5Km	9.1223		X4NPHte	25.1408
PUNP4	-13.9875		RNDR2	9.11962		X4NPHSULT	25.1208
NDPK8	-13.9829		EX_ascb_L.e.	9.11934		ENO	25.1062
RE3347C	-13.9765		DHAAt1r	9.11838		THRATB0tc	25.0997
EX_arg_L.e.	-13.9763		EX_thf.e.	9.10353		DNDPt57m	25.0139
ACALDt	-13.975		G5SADs	9.10236		X4NPHSFte	24.9948
PPAm	-13.9686		GLU5SAtmc	9.10236		FATP9t	24.9866
NDPK3	-13.9647		DESAT18_3	9.10236		r1955	24.9151
CYSPHELAT2tc	-13.9627		RTOTAL2FATPc	9.10236		NRVNCt	24.9069
ATP1ter	-13.9619		EX_5mthf.e.	9.10236		EX_11_cis_retfa.e.	24.8868
r2402	-13.956		THFt2	9.10236		ABTti	24.8447
r1981	-13.9558		NTD8	9.10213		EX_abt.e.	24.8447
RADH2	-13.9494		ASCBt4	9.10213		LNLCCPT2	24.8355
PPItr	-13.9477		ELAIDCRNt	9.09934		FAOXC182806m	24.8355
SULFOX	-13.9477		X3HBCOAHLm	9.09102		ARTPLM3	24.8074
ATPH2e	-13.9449		EX_dhdascb.e.	9.08711		CSNATr	24.8006
EX_acald.e.	-13.9448		DGK1	9.08267		LNLCCPT1	24.7958
CYTK11	-13.9437		EX_retn.e.	9.07925		LNLCCRNt	24.7958
RE2974C	-13.9435		RETNt	9.0777		r0463	24.7831
PPItm	-13.9433		O2Stm	9.06195		EX_leuktrA4.e.	24.7791
CYTK2	-13.9387		XYLUR	9.06195		LEUKTRA4t	24.7791
UMPK5	-13.9376		ATPS4m	9.06195		XYLTD_Dr	24.7669
EX_ncam.e.	-13.9341		EX_bildglcur.e.	9.05771		XYLK	24.7669
EX_adp	-13.9338		OIVD2m	9.05563		ACACT1x	24.7663
CYSASNNaEx	-13.9337		ACOAD9m	9.05563		PSt3	24.7584
HIStiDF	-13.9318		ECOAH12m	9.04401		HSD17B1	24.7511
CYSGLUexR	-13.9294		CSNATr	9.0421		EX_ps_hs.e.	24.7419
BTNDe	-13.9287		HSD17B1	9.0421		H2Otn	24.7339
EX_biocyt.e.	-13.9287		GTHRDt	9.01987		ABTD	24.7295
EX_btn.e.	-13.9287		NTP3e	9.01607		SFGTH	24.6069
EX_lys_L.e.	-13.9287		FAOXC1811601m	8.99439		MEOHt2	24.5851
r1050	-13.9273		EX_retinol.e.	8.96981		FTHFL	24.5647
VITD3t2	-13.9185		r2520	8.96291		EX_meoh.e.	24.5374
FAOXC12C10x	-13.9184		SUBERICACT	8.95206		FALDH	24.5374
RE3270C	-13.9131		r0838	8.95176		DURIK1	24.5325
PROD2	-13.9082		UDPDOLPT_U	8.93421		r1945	24.5007
GLNtm	-13.9079		FACOAL1813	8.9272		r1981	24.4711
r0399	-13.907		r2408	8.92629		GUAPRT	24.4568
GLUNm	-13.9037		EX_no.e.	8.92629		METATB0tc	24.3877
EX_ura.e.	-13.8909		NOt	8.91601		r1682	24.3438
DNDPt28m	-13.8873		DOLPMT4_Uer	8.91188		PI3P3Pn	24.3372
CHOLESACATc	-13.8847		BILDGLCURt	8.90764		MMMm	24.2249
ALDD2y	-13.8834		ALR2	8.90313		MMEm	24.2214
DNDPt42m	-13.8792		ATP1ter	8.90313		MMCDm	24.2214
r2395	-13.8682		BILDGLCURtr	8.90313		RETH2e	24.2184
CYTK4	-13.8681		HMGCOAtx	8.89788		DNDPt35m	24.1969
r2011	-13.8477		DOLGLCP_Uter	8.89216		EX_retinol_cis_11.e.	24.1684
r1722	-13.8459		r0813	8.89091		DNDPt14m	24.1144
URAt	-13.8434		EX_elaid.e.	8.88959		r1954	24.0876
RE1530M	-13.843		ELAIDt	8.88816		HISyLATtc	24.0876
r2041	-13.8346		FATP6t	8.88538		O2Stm	23.8807
DNDPt1m	-13.8305		O2tp	8.88449		FACOAL1813	23.8699
THYMDt1	-13.8251		SUBERCACT	8.87873		ELAIDCPT2	23.8535
PPAer	-13.8208		SBCOAACOTx	8.87149		ELAIDCRNt	23.8535
r0456	-13.8199		DHCRD2	8.87111		FAOXC1811601m	23.8535
r1966	-13.8187		ARGSL	8.86569		XYLUR	23.8504
DADAe	-13.8139		ARGSS	8.86569		UDPDOLPT_U	23.8439
EX_na1.e.	-13.8131		FACOAL1812	8.86263		ATPS4m	23.834
RTOTAL2t	-13.8104		DOLGPP_Uer	8.86114		EX_elaid.e.	23.8262
ASNGLNNaEx	-13.8024		ALR3	8.84902		DOLPMT4_Uer	23.8122
GLNCYSNaEx	-13.8009		r1747	8.84513		NTD8	23.802
CYTK1n	-13.7972		ALCD22_L	8.84306		BPNT2	23.7984
CYTK2n	-13.7962		LNLNCGCPT1	8.84059		ELAIDt	23.7852
ADA	-13.7895		RDH4	8.83613		GK1	23.7825
CYTK9	-13.7855		RETI3	8.8348		RNDR2	23.7825
DESAT18_10	-13.7854		RAI3	8.83202		DGK1	23.7825
AMPTASECG	-13.7852		SUBEACTD	8.83118		r0838	23.7715
PROIMINOtc	-13.7788		FAOXC183806x	8.8288		DOLGPP_Uer	23.7615
CHOLESTTDe	-13.7788		FAOXC183806m	8.82824		EX_dhdascb.e.	23.7522
FAOXC140	-13.7767		ADRNt	8.82403		FATP6t	23.7394
CHOLESTle	-13.7752		C8DCc	8.82286		DOLGLCP_Uter	23.7146
r0603	-13.7726		GTHS	8.82067		G5SADs	23.7091
RNMK	-13.7719		GLUCYS	8.82067		GLU5SAtmc	23.7091
EX_xylt.e.	-13.7692		EX_val_L.e.	8.82039		EX_ascb_L.e.	23.7049
PNP	-13.7677		DOLGLCP_Lter	8.82039		DHAAt1r	23.704
XYLTt	-13.7583		DOLGPP_Ler	8.82039		DESAT18_3	23.693
DPMVDc	-13.7579		ALCD21_L	8.80762		GTHRDt	23.6745
PEPCKm	-13.753		FAOXC8C6x	8.79696		r2520	23.6745
CYTK13	-13.7528		AGPAT1	8.78323		O2tp	23.6693
G3PD1	-13.7513		RTOTAL3CRNCPT2	8.78157		ASCBt4	23.6646
UMPK7	-13.7505		RTOTAL3CRNt	8.77053		ADRNt	23.6488
RTOTALt	-13.75		ARTPLM3m	8.77053		EX_bildglcur.e.	23.6472
r0129	-13.749		r2047	8.76793		RDH4	23.6328
CYSGLYexR	-13.7381		GPAM_hs	8.76021		RETI3	23.6328
RAI2	-13.7239		FAOXC18480x	8.75632		DHCRD2	23.6317
DADNK	-13.723		LNLNCGCPT2	8.75318		RAI3	23.6287
RETI2	-13.7218		LNLNCGCRNt	8.74631		LEUATB0tc	23.6089
ARGtiDF	-13.7132		GSNt4	8.74129		PHEATB0tc	23.6089
VITD3t	-13.7088		GSNt	8.73664		PGMT	23.5966
CYSTLEUrBATtc	-13.7079		VACCt	8.73386		PGS	23.589
r2396	-13.7074		HDCEAtr	8.72689		PROSTGD2t	23.589
ASCBSVCTtc	-13.7018		EX_hdcea.e.	8.7266		EX_pro_L.e.	23.5866
MEVK1c	-13.6986		TYRPHELAT2tc	8.72628		GGT6	23.579
ASNPHELAT2tc	-13.6894		FAOXC1811602m	8.71378		PGDI	23.5786
INSt4	-13.686		SUBERCROT	8.68017		EX_prostgd2.e.	23.5786
EX_gly.e.	-13.685		DOLPMT4_Ler	8.66239		LGNCCOAtx	23.5755
MTHFC	-13.6847		CHOLESTle	8.6439		EX_lgnc.e.	23.5755
r2400	-13.6751		RTOTAL3CRNCPT1	8.63363		FACOAL240	23.5755
DURIK1m	-13.6741		X2MCITt	8.63088		FAOXC200180x	23.5755
EX_uri.e.	-13.6663		CHOLESACATc	8.63088		FAOXC240200x	23.5755
DESAT16_2	-13.6572		r1778	8.6272		RTOTAL2FATPc	23.5662
r2413	-13.654		r1374	8.62719		r2401	23.5595
DADA	-13.6439		NDPK9n	8.61784		ELAIDCPT1	23.5311
CITtbm	-13.64		EX_2mcit.e.	8.60641		EX_thf.e.	23.5298
r2009	-13.6395		MCITS	8.60641		DIGALSIDEtl	23.5186
EX_fol.e.	-13.6352		PGLc	8.60163		GALSIDEtl	23.5186
THRPHELAT2tc	-13.6272		r1999	8.59812		GALtly	23.5186
ILEATB0tc	-13.6138		EX_ksi_deg1.e.	8.58625		GLAl	23.5186
DNDPt31m	-13.609		FUCASE2e	8.58624		RE2666C	23.5186
r2026	-13.6024		C226COAtx	8.58418		AMPtr	23.5065
EX_ppa.e.	-13.6024		ORNDC	8.57924		BILDGLCURt	23.4977
PMEVKc	-13.5984		HMGCOASi	8.57342		r0584	23.4848
SBPP1er	-13.5915		ACACtx	8.57075		r2043	23.4795
DNDPt40m	-13.5888		VACCCPT1	8.55437		ALR2	23.4725
r0085	-13.5859		GAPD	8.54374		PI34P4Pn	23.4677
DCTPtn	-13.5837		r0013	8.53237		C4CRNCPT2	23.4621
X4NPHSFte	-13.5739		r2413	8.5263		C4tmc	23.4621
X4NPHSULT	-13.5739		r2015	8.52493		EX_5mthf.e.	23.4551
X4NPHte	-13.5739		RE3242C	8.52446		THFt2	23.4534
DNDPt62m	-13.5721		r1375	8.52358		RETHe	23.4522
r0156	-13.5677		r2397	8.52358		RETFA	23.4489
DNDPt63m	-13.5669		PGK	8.51943		RETFAt	23.4489
PI45P5Pn	-13.5652		EX_ksi.e.	8.50921		ATP1ter	23.4483
RE1342C	-13.5638		EX_crvnc.e.	8.50536		BILDGLCURtr	23.441
PGLc	-13.5506		FACOAL226	8.50536		r0813	23.441
EX_4nph.e.	-13.5471		HMGLx	8.49563		MECOALm	23.4269
EX_4nphsf.e.	-13.5471		r1488	8.49563		MECOAS1m	23.4269
EX_lnlnca.e.	-13.5402		RE3241C	8.49563		TRPATB0tc	23.4177
EX_ala_L.e.	-13.5359		RE3243C	8.49405		NDP7ex	23.4118
PPAt	-13.5299		GLNS	8.48778		G5SDym	23.4104
FAOXC2251836x	-13.5241		EX_cgly.e.	8.48496		GLU5Km	23.4104
INSt	-13.5232		PPM	8.48496		EX_retn.e.	23.4026
FACOAL1832	-13.523		FBA	8.48496		RETNt	23.4026
G5SADrm	-13.5227		AMPTASECGe	8.48496		DNADtn	23.3996
CYSTGLUex	-13.516		SPHMDAc	8.47294		NICRNTtn	23.3996
LNLNCAt	-13.5147		VACCCPT2	8.46231		NNATn	23.3996
P5CDm	-13.5109		FACOAL161	8.45757		ATPtn	23.3996
MCCCrm	-13.5109		EX_dcsptn1.e.	8.45585		NDPK10n	23.3873
HXPRT	-13.5101		FACOAL2251	8.45585		EX_retinol.e.	23.3795
NDPK5m	-13.4974		UDPDOLPT_L	8.45447		ARTPLM1m	23.3735
MGCHrm	-13.4926		ME1m	8.45447		RTOTALCRNt	23.3662
PCm	-13.4925		SPC_HSt	8.44321		RTOTALCRNCPT1	23.3606
SPH1Ptr	-13.492		GLCter	8.43876		RTOTALCRNCPT2	23.3606
ACOAD8m	-13.4829		VACCCRNt	8.38507		r2408	23.3576
TYRPHELAT2tc	-13.4788		EX_chtn.e.	8.36857		ALR3	23.3562
SPHGNtr	-13.4673		ACACt2	8.36451		ALCD22_L	23.3502
r1772	-13.4586		EX_acac.e.	8.36307		EX_no.e.	23.3286
GLNtN1	-13.4353		r0787	8.36307		NOt	23.3286
biomass_reaction	-13.425		EX_Rtotal.e.	8.36257		ARGSL	23.3286
ADNK1	-13.4169		ACACT1r	8.36038		ARGSS	23.3286
r2042	-13.4028		EX_spc_hs.e.	8.36038		NDPK10	23.3214
P5CRm	-13.3888		SMS	8.36038		ALCD21_L	23.3148
HIStN1	-13.3583		DCSPTN1t	8.35289		H2Otly	23.3073
r2037	-13.346		ITPtn	8.34857		ACACT10m	23.3018
GLNS	-13.3453		NDPK9	8.34857		ECOAH9m	23.3018
DNDPt7m	-13.3029		r2396	8.34459		HACD9m	23.3018
r1696	-13.3004		r2398	8.34213		OIVD3m	23.3018
r1823	-13.2964		DNDPt17m	8.34213		EX_ile_L.e.	23.3018
PFK	-13.269		NADtpu	8.34029		EX_9_cis_retfa.e.	23.301
EX_urate.e.	-13.2302		RE3244C	8.33529		EX_lnlncg.e.	23.293
URATEt	-13.2302		G6PPer	8.31721		FACOAL1831	23.293
EX_11_cis_retfa.e.	-13.2246		IDPtn	8.29291		LNLNCGt	23.293
EX_9_cis_retfa.e.	-13.2246		DAGK_hs	8.28505		DCK2n	23.2892
RPE	-13.1894		OMPDC	8.26521		EX_ocdcea.e.	23.2758
O2tp	-13.1886		ORPT	8.26521		DCK1n	23.2723
P5CRxm	-13.1788		RE3050R	8.24843		EX_lnlc.e.	23.2675
r2024	-13.178		RE3421R	8.24843		LINOFATPtc	23.2675
CYANt	-13.1749		RE3524R	8.24843		DITPtn	23.2495
METATB0tc	-13.1707		C9BRxtc	8.24843		DIDPtn	23.2493
PI4P5K	-13.1609		LEUPHELAT2tc	8.24843		DNDPt19m	23.2321
GUAD	-13.1569		AHCYStd	8.24843		XOLEST2te	23.1704
r2035	-13.1539		AMETtd	8.24843		RPI	23.1085
RE2954C	-13.1523		CHSTEROLtrc	8.24843		FAOXC80	22.9693
PYK	-13.1479		FRDPtcr	8.24843		DTTPtn	22.9686
MTHFR3	-13.1433		G6Pter	8.19711		NDPK4n	22.9686
ALCD1	-13.1428		RE2658R	8.19321		DTDPtn	22.9659
DNDPt17m	-13.1395		RE2660C	8.19321		MI14PP	22.9441
CYSTA	-13.138		RE2655R	8.1631		MI4PP	22.9441
CYTK13n	-13.128		DHORTS	8.12648		ITCOALm	22.9275
ADSL1	-13.1261		RE2651R	8.10768		r1786	22.8792
PTRCOX1	-13.1218		DHORD9	7.94354		GLCMter	22.8539
ADSS	-13.1177		CBPS	7.90955		RETt	22.8064
r1669	-13.1173		FAOXC225C204x	7.81037		ITCOAL1m	22.8028
SERALANaEx	-13.117		FAOXC205C184x	7.80481		NCAMUP	22.7769
EX_cyan.e.	-13.1156		FAOXC225C226x	7.79857		AKGDm	22.7325
EX_tcynt.e.	-13.1156		ASPCTr	7.78657		FAOXC8C6m	22.6812
MCPST	-13.1156		RE1901R	7.73091		PFK	22.6685
TCYNTt	-13.1133		RE2079R	7.73091		EX_nac.e.	22.6331
EX_ocdca.e.	-13.1053		ESTSULT	7.68551		r0527	22.6331
r2016	-13.1053		ESTRONESt	7.64318		NDPK1m	22.6316
r1940	-13.1012		FAOXC225x	7.61906		SUCD1m	22.5799
RE0344C	-13.1007		R_group_phosphotase_3	7.60447		ARTFR43	22.5782
FALDtly	-13.0797		ESTRADIOLt	7.60447		r0060	22.569
ADNtm	-13.0724		RTOTAL3t	7.59067		r1757	22.5184
r1427	-13.0714		EX_estradiol.e.	7.57698		r1784	22.3465
NDPK4	-13.0703		EX_estrones.e.	7.56714		FAOXC2051843x	22.3457
ADNK1m	-13.0696		r0156	7.5662		NADPHtru	22.334
PGDI	-13.0528		r0085	7.5662		NADPtru	22.334
FOLR2	-13.0457		FAOXC163C164x	7.43535		GLCURter	22.3325
r1921	-13.0397		ALCD1	7.43417		GULNDer	22.3325
EX_meoh.e.	-13.0332		RE1709C	7.4331		GULNter	22.3325
FALDH	-13.0332		FAOXC163x	7.41383		LNELDCt	22.3257
FTHFL	-13.0332		RE0830C	7.39439		CATm	22.3059
H2O2tly	-13.032		FAOXC163C142x	7.34016		EX_s2l2fn2m2masn.e.	22.2672
MEOHtly	-13.032		PRDXl	7.32766		EX_s2l2n2m2masn.e.	22.2672
EX_prostgd2.e.	-13.0197		FAOXC142C122x	7.30089		FUCASEe	22.2672
PRDXl	-13.0189		FAOXC122x	7.2898		EX_gtp.e.	22.2489
GLYCK2	-13.0094		FAOXC102C101x	7.24275		EX_retinol_9_cis.e.	22.2318
MEOHt2	-13.0088		FAOXC101x	7.24275		RETH1e	22.2318
SFGTH	-13.0088		MEOHtly	7.23852		SO4CLtex2	22.2097
r0512	-13.0035		FAOXC164C163x	7.22581		RE0383C	22.2025
EX_thymd.e.	-13.0023		FAOXC184C163x	7.22581		FACOAL1822	22.1844
FBA	-12.9926		H2O2tly	7.21631		DMATTx	22.1823
HPYRRy	-12.9913		FALDtly	7.19455		GRTTx	22.1823
PGS	-12.9869		UROLACer	7.17408		IPDDIx	22.1823
PROSTGD2t	-12.9852		FAOXC226C225x	7.15887		PPItx	22.1823
DNDPt30m	-12.9829		FOAXC122C101x	7.15887		H2Oter	22.145
r0911	-12.9666		NADPHtxu	7.15887		r1751	22.137
r0160	-12.9623		NADPtxu	7.15887		EX_lneldc.e.	22.0577
r0502	-12.9166		ADPtx	7.15887		SUCOAS1m	22.04
r1822	-12.8792		HEXCOAACBP	7.14066		r1900	21.9306
r1666	-12.8698		ATPtx	7.13467		NTP3e	21.8749
r2439	-12.8648		CO2tp	7.13467		HMGCOAtx	21.7676
HIBDm	-12.8588		DPMVDx	7.12411		FAOXC183806m	21.7074
OIVD2m	-12.8588		MEVK1x	7.12408		LNLNCGCPT1	21.6111
DESAT18_9	-12.8579		PItx	7.12408		LNLNCGCPT2	21.6111
EX_spc_hs.e.	-12.8476		PMEVKx	7.12402		LNLNCGCRNt	21.6111
NDPK8n	-12.8458		r0954	7.12402		RTOTAL3CRNt	21.6082
ACGAMK	-12.8377		GLRASE	7.1136		ARTPLM3m	21.6082
AGDC	-12.8377		GULLACter	7.1136		RTOTAL3CRNCPT2	21.5797
ACOAD9m	-12.8197		L_LACt2r	7.1136		FAOXC183806x	21.4996
XYLTD_Dr	-12.8137		L_LACt4r	7.1136		GTHS	21.497
PMI12346PH	-12.813		PE_HSter	7.1136		GLUCYS	21.497
PMI12346PHn	-12.813		PYRt2r	7.1136		RTOTAL3CRNCPT1	21.4318
MINOHPtn	-12.813		RETI1	7.1136		NDPK9n	21.4309
ECOAH12m	-12.8125		SUCCtp	7.1136		r2047	21.4113
XYLK	-12.8096		FAOXC204C205x	7.11332		FAOXC8C6x	21.4111
SMS	-12.8057		C6CRNtcx	7.08422		NDP8	21.346
PPMI12346Ptn	-12.7982		FAOXC184x	7.07455		CHOLESTle	21.3435
ARTFR210	-12.7982		FRDPtr	7.05858		CHOLESACATc	21.3422
EX_o2s.e.	-12.7733		GLACter	7.05858		RETH2	21.3152
r1955	-12.7705		GLNLASEer	7.05858		X2MCITt	21.2936
SPC_HSt	-12.7501		C60CPT1	7.02005		EX_2mcit.e.	21.2936
FAOXC10C8m	-12.7331		RE3000M	6.99801		MCITS	21.2936
O2St	-12.7242		RE0577C	6.99442		ORNDC	21.2301
GCC2am	-12.7202		EX_arach.e.	6.99442		UDPDOLPT_L	21.2278
GCC2bim	-12.7202		RE3001M	6.98194		C226COAtx	21.2087
GCC2cm	-12.7202		C6COAt	6.9744		EX_crvnc.e.	21.2087
EX_val_L.e.	-12.719		RE1521M	6.91155		FACOAL226	21.2087
X3HBCOAHLm	-12.719		RE1526M	6.91155		r2396	21.1904
TAGt	-12.7147		RE1533M	6.91155		r2398	21.1898
R_group_phosphotase_3	-12.7145		RE1573M	6.91155		GLCter	21.1889
DGULND	-12.7113		RE2999M	6.91155		EX_cgly.e.	21.1839
RTOTAL3t	-12.708		RE3003M	6.8712		ME1m	21.1786
PI345P5Pn	-12.7033		PGM	6.84508		PI4P5Kn	21.1668
PI45P3Kn	-12.7033		DESAT20_1	6.84152		ITPtn	21.1616
PGI	-12.6996		FACOAL203	6.84152		NDPK9	21.1616
MI145PP	-12.699		DAGt	6.83778		DNDPt17m	21.1478
SBTD_D2	-12.6936		RE3004M	6.80979		DOLPMT4_Ler	21.1185
ACOAD10m	-12.6882		RE3005M	6.77366		IDPtn	21.1025
UDPGD	-12.6872		FAOXC101C8x	6.72443		PPM	21.0671
UDPGNP	-12.6872		PGPPT	6.6848		G6PPer	21.0108
DGAT	-12.6846		CDIPTr	6.6848		G6Pter	21.0108
LPSe	-12.6839		C10DCCACT	6.6848		FBA	21.0084
PGM	-12.6834		C10DCc	6.6848		AMPTASECGe	20.9892
r0908	-12.6764		SEBACACT	6.6848		X3HBCOAHLm	20.9599
r0909	-12.6764		SEBACIDTD	6.6848		EX_val_L.e.	20.9599
GLUt2m	-12.6756		ACITL	6.6729		DOLGLCP_Lter	20.9416
DAGt	-12.6708		PEHSFABPe	6.6729		DOLGPP_Ler	20.9416
GULN3D	-12.6627		PCHOL_HSter	6.6729		r1763	20.934
DESAT18_7	-12.6565		PETOHMr_hs	6.6729		ECOAH12m	20.8773
FACOAL1812	-12.6565		AHCYStr	6.6729		OIVD2m	20.8758
VACCt	-12.6565		FAOXC180	6.65459		ACOAD9m	20.8758
SPHMDAc	-12.6509		ARACHCPT1	6.65459		HIBDm	20.7776
RE1518M	-12.6434		ARACHCPT2	6.65459		ARTFR33	20.7358
H2Otly	-12.6245		RE3006M	6.63901		r1986	20.7337
MG1er	-12.6185		RE3624M	6.63901		r2054	20.7335
RE2998M	-12.6141		SEBCOACROT	6.58157		CYSSERNaEx	20.5623
PI45PLC	-12.5822		DCSPTN1COAtx	6.57733		r1735	20.5056
LYStiDF	-12.5452		EX_vacc.e.	6.57733		GPAM_hs	20.3559
MI14PP	-12.5234		ADRNCOAtx	6.57733		SUBERICACT	20.2352
MI4PP	-12.5043		PSP_L	6.56922		AGPAT1	20.232
PI34P4Pn	-12.4561		EX_adrn.e.	6.5625		FAOXC18480x	20.2082
MM6B2g	-12.3654		FACOAL224	6.5625		FACOAL1812	20.1916
DHAAt1r	-12.1395		CSm	6.55828		VACCt	20.1916
EX_ascb_L.e.	-12.1212		PSERT	6.55341		SUBERCROT	19.9633
EX_dhdascb.e.	-12.1212		ARACHCRNt	6.54893		SUBERCACT	19.9543
PGK	-11.8689		SPODMn	6.54092		SBCOAACOTx	19.9068
DAGK_hs	-11.8332		EX_thym.e.	6.54091		SUBEACTD	19.9068
GTHRDt	-11.8202		FUM	6.53805		FAOXC1811602m	19.814
r2520	-11.8202		MDHm	6.53487		C8DCc	19.8038
ACCOAC	-11.6051		AMETr	6.52844		r1675	19.7639
ASCBt4	-11.5957		FAOXC101C102x	6.52487		r1375	19.6637
EX_retinol_9_cis.e.	-11.4577		r0937	6.5126		r1374	19.6284
RETH1e	-11.4518		SUCCOAPET	6.49136		r2413	19.6148
EX_gthrd.e.	-11.4488		ATP2ter	6.49136		r2397	19.6121
NDP3ex	-11.3289		COAtr	6.49136		PGLc	19.5986
G6PPer	-11.2831		r0936	6.49136		HMGCOASi	19.5733
G6Pter	-11.2831		CYOOm2	6.46783		r0013	19.5336
EX_gal.e.	-11.1401		EX_dag_hs.e.	6.46428		TYRPHELAT2tc	19.5256
EX_utp.e.	-11.1002		FAOXC200180m	6.46077		VACCCRNt	19.4853
NDP8ex	-11.1002		FAOXC226205x	6.45474		HMGLx	19.4295
GALK	-11.0885		NADtx	6.45474		ACACtx	19.4255
GALt1r	-11.0885		ACACT5p	6.45474		RE3243C	19.3849
KCCt	-11.0756		r0661	6.45474		RE3244C	19.3849
NaKt	-11.0756		DLNLCGt	6.4476		VACCCPT1	19.3815
FAOXC101m	-11.0496		EX_dlnlcg.e.	6.4476		VACCCPT2	19.3815
MMTSADm	-11.0353		SEBCOAPET	6.44727		r1778	19.381
FAOXC121C101m	-11.0299		PGCD	6.44157		SPHMDAc	19.3705
EX_ksi.e.	-11.0012		OMHPALTD	6.38786		NADtpu	19.3702
EX_ksi_deg1.e.	-11.0012		THYMt	6.37814		EX_chtn.e.	19.3698
FUCASE2e	-11.0012		HEXDICOAACBPx	6.35833		r2014	19.3678
ARTFR207	-10.9999		FAOXC102C103x	6.34712		RE3242C	19.365
UDPG4E	-10.997		FAOXOHC16C16DCc	6.33609		SPC_HSt	19.3407
EX_ser_L.e.	-10.981		HEXDIACTD	6.33609		ACACT1r	19.3365
FAOXC141C121m	-10.9761		FAOXC102C81x	6.32247		r1488	19.3362
EX_man.e.	-10.9338		IPDPtx	6.28967		RE3241C	19.3362
EX_vacc.e.	-10.9191		DEDOLP1_L	6.28967		EX_spc_hs.e.	19.2579
LGNCCOAtx	-10.9034		DEDOLP2_L	6.28967		SMS	19.2579
FAOXC161C141m	-10.8975		DEDOLR_L	6.28967		r1747	19.2437
C161CPT1	-10.8975		DOLK_L	6.28967		r1999	19.2437
C161CRNt	-10.8975		FT	6.28967		r2015	19.2437
C161CPT2	-10.8975		GGT_L	6.28967		LCADi	19.1602
EX_Rtotal.e.	-10.8908		ARTPLM2	6.28967		HDCEAtr	19.1278
HEX7	-10.8547		LPS3	6.28967		EX_hdcea.e.	19.1275
HEX4	-10.8406		GLYK	6.28967		EX_ksi_deg1.e.	19.0751
MAN6PI	-10.8406		EX_pglyc_hs.e.	6.28967		FUCASE2e	19.0751
MANt1r	-10.8406		PGLYCt	6.28967		GLNS	19.0249
EX_fuc_L.e.	-10.8271		PGPP_hs	6.28967		EX_ksi.e.	18.9981
EX_gln_L.e.	-10.7993		MTRI	6.27668		EX_dcsptn1.e.	18.9944
GAPD	-10.7956		SPMS	6.27668		FACOAL2251	18.9944
FAOXC8C6m	-10.778		MDH	6.27668		PGK	18.9903
ARTFR13	-10.7538		EX_pyr.e.	6.26215		GAPD	18.9818
EX_lpchol_hs.e.	-10.7474		FRDPtc	6.26215		DCSPTN1t	18.8862
EX_lgnc.e.	-10.7444		LNELDCCRNt	6.25667		DAGK_hs	18.8409
FACOAL240	-10.7271		TAGt	6.24714		FACOAL161	18.8275
FAOXC200180x	-10.7264		DGAT	6.24714		OMPDC	18.8207
FAOXC240200x	-10.7248		LPSe	6.24714		ORPT	18.8207
UNK3	-10.7187		LNELDCCPT2	6.23913		ACACt2	18.82
ASPCTr	-10.6677		FAOXC102x	6.2372		EX_acac.e.	18.82
CBPS	-10.6677		FAOXC103C102x	6.2372		r0787	18.7907
DHORD9	-10.6677		FAOXC123C102x	6.2372		EX_Rtotal.e.	18.7904
RTOT2	-10.6455		FAOXC123x	6.2372		r1754	18.7702
ARTCOAL1	-10.6391		FAOXC143C123x	6.2372		DHORTS	18.682
NACDe	-10.6377		FAOXC164C143x	6.2372		DHORD9	18.4991
TAGHSTDe	-10.637		FAOXC6DCC4DCx	6.23456		CBPS	18.4651
NACUP	-10.6279		FAOXC8DCC6DCx	6.23456		ASPCTr	18.3421
RE0383C	-10.622		MTAP	6.23177		SERCYSNaEx	18.3274
DHORTS	-10.6181		PGI	6.2077		R_group_phosphotase_3	18.2093
OMPDC	-10.6181		EX_fuc_L.e.	6.19912		ESTSULT	18.2048
ORPT	-10.6181		ARACHDCOAtx	6.19421		EX_estradiol.e.	18.2048
DMATTx	-10.6049		MDRPD	6.18924		EX_estrones.e.	18.2048
ARTFR44	-10.5997		FAOXC164C165x	6.17984		RTOTAL3t	18.1739
EX_udp.e.	-10.5987		DKMPPD	6.17922		ESTRONESt	18.1624
NADPHtru	-10.5984		FAOXC164x	6.17734		r0156	18.1255
NADPtru	-10.5984		FAOXC165C164x	6.17734		r0085	18.1255
GLCURter	-10.5981		FAOXC184C164x	6.17734		ESTRADIOLt	18.1237
GULNDer	-10.594		FAOXC61C4x	6.17734		ALCD1	18.0712
GULNter	-10.594		FAOXC61x	6.17734		PRDXl	17.9668
CRNtim	-10.5832		FAOXC16C14x	6.16955		MEOHtly	17.8566
RE0512M	-10.5593		ADMDC	6.16955		H2O2tly	17.8344
RE1516M	-10.5593		FUMm	6.14713		FALDtly	17.8126
NTP3e	-10.5559		H2O2tn	6.14713		HEXCOAACBP	17.8083
RE1517M	-10.5555		O2Stn	6.14713		C6CRNtcx	17.7519
RE1522M	-10.5555		FAOXC18280m	6.13133		C60CPT1	17.6421
RE1523M	-10.5555		O2tn	6.12854		C6COAt	17.6421
RE1525M	-10.5555		EX_tcynt.e.	6.12242		PIK4n	17.4489
RE1531M	-10.5555		ARACHt	6.11043		PGM	17.4438
RE1532M	-10.5555		TCYNTt	6.08099		DESAT20_1	17.4399
ACACT10m	-10.5385		EX_cyan.e.	6.0657		FACOAL203	17.4399
ECOAH9m	-10.5385		r0488	6.02997		DAGt	17.4374
RE3273C	-10.5371		KAS8	6.02997		r1726	17.4163
EX_gtp.e.	-10.5333		CYOR_u10m	6		r1898	17.0813
PPItx	-10.5193		FAOXC81C61x	5.98321		DLNLCGt	17.0417
GRTTx	-10.5193		MCPST	5.94896		EX_dlnlcg.e.	17.0417
IPDDIx	-10.5193		TMDPP	5.94264		PSERT	17.0397
EX_lnlc.e.	-10.5047		LNELDCCPT1	5.93529		PGCD	17.0397
LINOFATPtc	-10.5047		FAOXC14C12m	5.92443		LNELDCCRNt	17.0347
EX_ile_L.e.	-10.4889		DHFR	5.92016		LNELDCCPT2	17.0347
HACD9m	-10.4889		C4tcx	5.91122		FAOXC18280m	17.0347
OIVD3m	-10.4889		TMDS	5.86036		PSP_L	17.0021
H2Oter	-10.4863		r0723	5.82622		TAGt	16.9743
FAS100COA	-10.4769		EX_nrvnc.e.	5.82622		DGAT	16.9735
FAS120COA	-10.4769		CYSTA	5.80264		LPSe	16.9719
ADK3	-10.4709		C4x	5.79584		PGI	16.9521
EX_sph1p.e.	-10.4569		LPS2	5.77469		EX_adrn.e.	16.9325
r0787	-10.4555		CHOLtu	5.77469		FACOAL224	16.9325
FAOXC183806x	-10.4381		EX_chol.e.	5.77469		DCSPTN1COAtx	16.884
COAtm	-10.4329		METS	5.77469		EX_vacc.e.	16.857
r0838	-10.4318		CYANt	5.77034		ADRNCOAtx	16.849
DSAT	-10.4279		EX_pe_hs.e.	5.74849		LNELDCCPT1	16.6827
SPH1Pte	-10.4276		CLPNDt	5.67195		EX_fuc_L.e.	16.6309
PSP_L	-10.4009		FACOAL241	5.67139		TCYNTt	16.5857
PSERT	-10.4009		NRVNCCOAtx	5.63823		ASNALANaEx	16.5335
PGCD	-10.3985		FAOXC121x	5.63823		EX_tcynt.e.	16.4537
ALAR	-10.37		FAOXC141C121x	5.63823		MCPST	16.4537
EX_ala_D.e.	-10.37		FAOXC161C141x	5.63823		EX_cyan.e.	16.397
GLCter	-10.3699		FAOXC181C161x	5.63823		CYSTA	16.1339
SPMDOX	-10.3313		TALA	5.57671		CYANt	16.1016
RE0691C	-10.3313		r1443	5.57671		RE0512M	15.9124
RE1897C	-10.3313		FAOXC241C221x	5.57533		RE1532M	15.8674
RE1898C	-10.3313		TKT1	5.57298		FACOAL204	15.7202
TALA	-10.3067		TKT2	5.57298		RE1525M	15.4753
TKT1	-10.2796		FAOXC6C4x	5.57293		RE1531M	15.4753
FAS140COA	-10.2769		CLPNDCOAtx	5.57293		RE1523M	15.3441
TKT2	-10.2716		RE1517M	5.55069		FAOXC14C12m	15.3021
ACACT1r	-10.2601		FAOXC201C181x	5.54831		RE1517M	15.2577
EX_pro_L.e.	-10.1248		RE1523M	5.54356		RE1522M	15.2577
SO4CLtex2	-9.80052		FAOXC221C201x	5.53745		C4x	15.2116
NDP7ex	-9.77889		RE1522M	5.47879		C4tcx	15.2116
FUMSO3tm	-9.70698		FACOAL204	5.44329		FAOXC6C4x	15.1542
MALSO3tm	-9.70698		RE0512M	5.43544		r1696	15.138
RE2973N	-9.61308		DESAT22_2p	5.43258		FACOAL2252	14.9682
RE2974N	-9.61308		FAS140COA	5.42794		DESAT22_2p	14.9681
C60CPT1	-9.60458		FAS120COA	5.42484		EX_CLPND.e.	14.9681
EX_lnlncg.e.	-9.58122		FAS100COA	5.42007		CLPNDt	14.9681
NADtpu	-9.53554		r1885	5.41657		RE1516M	14.9668
C6COAt	-9.45922		FAOXC12C10m	5.39947		CLPNDCOAtx	14.8691
X3MOBt2im	-9.44838		RE1532M	5.39044		FAS140COA	14.8374
FAOXC2051843x	-9.42797		FACOAL2252	5.3551		FAS120COA	14.8151
VALTA	-9.41883		EX_CLPND.e.	5.35504		r1885	14.783
ORNDC	-9.41574		RE1525M	5.35044		FAOXC12C10m	14.7771
HMGCOASi	-9.40951		NACHEX27ly	5.33606		NACHEX27ly	14.764
EX_5mthf.e.	-9.39967		PTPAT	5.32353		FAS100COA	14.7639
THFt2	-9.39048		FAOXC14C12x	5.32353		HAtly	14.7198
EX_thf.e.	-9.39048		EX_lac_L.e.	5.32144		GLCAASE9ly	14.7117
ARTPLM3	-9.3903		GLCAASE9ly	5.32123		GLCURtly	14.7117
FAOXC18480x	-9.38248		GLCURtly	5.32123		RPE	14.6835
FAOXC12C10m	-9.37954		HAtly	5.32016		RE3273C	14.654
FAOXC14C12m	-9.37954		FAOXC14DCC12DCx	5.29246		ARTPLM2m	14.3177
G5SDym	-9.37767		FAOXC16DCC14DCx	5.29246		EX_so4.e.	14.1723
GLU5Km	-9.37767		FAOXC16DCr	5.29246		FAOXC16C14m	14.0865
VALt5m	-9.36641		FAOXC16OHC16r	5.29246		EX_ha.e.	14.0733
VALTAm	-9.34387		RE1516M	5.2598		GLCAASE8ly	14.0733
ENO	-9.30107		FAOXC12DCC10DCx	5.25192		FACOAL160i	13.9971
HMGCOAtx	-9.30036		FAOXC10DCC8DCx	5.23999		ATPasel	13.997
FACOAL1831	-9.29616		SUCCTD	5.23999		RTOTAL2CRNt	13.7941
LNLNCGt	-9.29616		O2ter	5.23999		NDPK6n	13.6596
C6CRNtcx	-9.27545		RPE	5.23513		RTOTAL2CRNCPT1	13.5698
CYTK4n	-9.22483		RE3273C	5.23513		RTOTAL2CRNCPT2	13.5698
HEXCOAACBP	-9.18589		GLYtm	5.22245		DUTPDPn	13.3594
EX_ps_hs.e.	-9.09096		GHMT2r	5.22245		OCT11EFATP	13.237
PSt3	-9.09096		C204CPT2	5.22245		OCD11CRNCPT2	13.237
HSD17B1	-8.54551		C204CRNt	5.22245		DUMPtn	13.1954
ELAIDt	-8.51295		FAOXC204	5.22245		DUDPtn	13.191
LNLNCGCPT1	-8.42189		DCSPTN1CPT1	5.22245		EX_camp.e.	13.0244
LNLNCGCPT2	-8.42189		STRDNCCPT1	5.22245		OCD11COACPT1	12.9437
LNLNCGCRNt	-8.42189		STRDNCCPT2	5.22245		OCD11CRNCACT	12.9437
EX_elaid.e.	-8.38627		RE1531M	5.21516		FAOXC181C161m	12.9029
FACOAL1813	-8.38627		AACTOOR	5.21423		CAMPt	12.9006
FAOXC183806m	-8.3759		PEt	5.18917		ADNCYC	12.899
ACACt2	-8.32833		AHC	5.18917		RE0691C	12.7292
EX_acac.e.	-8.32833		METAT	5.18917		RE1897C	12.7292
H2O2tn	-7.92308		GLYATm	5.18917		RE1898C	12.7292
O2tn	-7.92308		AOBUTDsm	5.18917		r1930	12.6185
SPODMn	-7.92308		AACTtm	5.18917		r1979	12.3654
O2Stn	-7.92308		CYTK12n	5.0985		EX_dag_hs.e.	12.2107
ACACT5p	-7.8758		CYTK14n	5.0985		SPMDOX	12.1404
r1443	-7.85687		CYTK3n	5.0985		FAOXC226205x	12.1234
FACOAL204	-7.78925		UMPKn	5.07529		NADtx	12.1207
r0661	-7.78822		ACACT4p	5.07529		ACITL	12.1055
r0723	-7.78822		r0727	5.07529		FUM	12.06
C4tcx	-7.33978		r0729	5.07529		PEHSFABPe	12.0202
LNELDCCPT1	-7.24063		UMPK4n	5.07529		PCHOL_HSter	12.0202
C4x	-7.20377		UMPK7n	5.07529		PETOHMr_hs	12.0202
ACACtx	-7.16521		r1445	5.0481		AHCYStr	12.0202
HMGLx	-7.16521		COAtm	4.98417		AMETr	12.0202
FAOXC6C4x	-7.15764		RE2996X	4.98417		MDHm	12.0009
RE3000M	-7.10915		C161CPT1	4.84347		SPODMn	11.9794
RE3001M	-7.10915		C161CRNt	4.84347		RE2974N	11.9578
RE1521M	-7.10915		OCT11EFATP	4.8151		RE2973N	11.9564
RE1526M	-7.10915		DUDPtn	4.8151		ARACHDCOAtx	11.906
LNELDCCRNt	-7.06302		OCD11CRNCPT2	4.8151		FAOXC16C14x	11.8435
LNELDCCPT2	-7.06302		FAOXC16C14m	4.81109		FAOXC241C221x	11.8173
RE1533M	-7.04795		ATPasel	4.81109		C161CPT1	11.8161
RE1573M	-7.04795		RE0691C	4.80608		C161CRNt	11.8161
RE2999M	-7.04795		RE1897C	4.80608		C161CPT2	11.8161
RE3003M	-7.04795		RE1898C	4.80608		MTRI	11.8148
RE3004M	-7.04795		STRDNCCRNt	4.73178		SPMS	11.8148
RE3005M	-7.04795		DCSPTN1CRNt	4.73178		r1443	11.783
RE3006M	-6.97259		PPCDC	4.7237		r0723	11.7827
RE3624M	-6.97259		PPNCL3	4.71472		EX_nrvnc.e.	11.7794
FAOXC18280m	-6.96392		ARTPLM2m	4.71307		FACOAL241	11.7794
DCSPTN1t	-6.72866		EX_so4.e.	4.71307		NRVNCCOAtx	11.7794
EX_dcsptn1.e.	-6.72866		C6DCc	4.70573		FAOXC121x	11.7794
FACOAL2251	-6.72471		EX_ha.e.	4.69377		FAOXC141C121x	11.7794
CLPNDt	-6.62719		GLCAASE8ly	4.69377		FAOXC161C141x	11.7794
EX_CLPND.e.	-6.62719		RE2985X	4.68887		FAOXC181C161x	11.7794
FACOAL2252	-6.62719		RE2986X	4.68887		FAOXC201C181x	11.7794
CLPNDCOAtx	-6.40154		RE2987X	4.68887		FAOXC221C201x	11.7794
RE2996X	-6.3884		DCSPTN1CPT2	4.6825		FUMm	11.7785
RE2985X	-6.3884		DUMPtn	4.64986		CITtbm	11.777
RE2986X	-6.3884		RE3002X	4.58739		UMPK6n	11.7764
ADRNCOAtx	-6.36519		CRNtim	4.58739		PPCDC	11.7717
EX_adrn.e.	-6.36519		RE2988X	4.58739		MTAP	11.7699
FACOAL224	-6.36519		UMPK6n	4.57261		MDH	11.7676
DCSPTN1COAtx	-6.34495		CAMPt	4.57224		EX_thym.e.	11.7675
DESAT22_2p	-6.33188		ADNCYC	4.5707		THYMt	11.7675
RE2987X	-6.31776		NDPK6n	4.56863		TMDPP	11.7675
RE2988X	-6.31776		FAOXC2252053m	4.55938		DHFR	11.7646
RE3002X	-6.31776		OCD11COACPT1	4.55738		TMDS	11.7646
ACACT4p	-6.24196		NADH2_u10m	4.52818		PPNCL3	11.7627
r0727	-6.24196		r0591	4.52818		TKT1	11.756
FAOXC8C6x	-6.2311		OCD11CRNCACT	4.52177		TKT2	11.756
r0729	-6.2063		SO4OXAtex2	4.51857		TALA	11.756
DCK1n	-6.18301		FAOXC181C161m	4.51665		ACACT5p	11.741
DCK2n	-6.18301		EX_camp.e.	4.51145		r0661	11.741
r1445	-6.17929		r0908	4.47842		MDRPD	11.7273
DPCOAK	-6.14118		C161CPT2	4.47628		DKMPPD	11.7173
LAPCOAl	-6.14118		ADPACTD	4.47214		ADMDC	11.7076
COAtl	-6.14118		ADPCOACROT	4.47214		r0908	11.6436
DPCOAtl	-6.14118		ADPCOAPTE	4.47214		r0909	11.6436
r1150	-6.14118		C6DCCACT	4.47214		DSAT	11.6032
EX_dag_hs.e.	-6.10802		DSAT	4.44557		H2O2tn	11.567
UMPK5n	-5.95652		DPCOAK	4.43228		O2Stn	11.567
UMPK6n	-5.95319		RTOTAL2CRNt	4.41159		O2tn	11.567
EX_crvnc.e.	-5.90427		KCCt	4.3936		PEPCKm	11.5561
C226COAtx	-5.84449		NaKt	4.3936		CYTK6n	11.5498
GHMT2r	-5.82484		ADPACDAc	4.3936		DPCOAK	11.4802
GLYtm	-5.74644		ASPTA	4.38489		UMPKn	11.4637
FACOAL226	-5.71175		RTOTAL2CRNCPT1	4.34499		CYTK12n	11.4637
EX_lneldc.e.	-5.7114		EX_pnto_R.e.	4.33649		CYTK14n	11.4637
ADSK	-5.67398		PNTK	4.33649		CYTK3n	11.4637
GLYATm	-5.66867		PNTOt5	4.33649		UMPK4n	11.4637
AOBUTDsm	-5.66597		ACGAMK	4.32212		UMPK7n	11.4637
EX_thym.e.	-5.63136		EX_sph1p.e.	4.31231		ACACT4p	11.393
EX_nrvnc.e.	-5.55805		SPH1Pte	4.31231		r0727	11.393
FACOAL241	-5.55805		CYTK6n	4.30914		r0729	11.393
NRVNCCOAtx	-5.55805		FAOXC2051843m	4.29703		r1445	11.393
FAOXC121x	-5.55805		FAOXC18480m	4.29703		COAtm	11.3857
FAOXC141C121x	-5.55805		C204CPT1	4.29703		EX_pnto_R.e.	11.3844
FAOXC161C141x	-5.55805		AKGMALtm	4.29703		PNTK	11.3844
FAOXC181C161x	-5.55805		G6PDH2rer	4.29703		PNTOt5	11.3844
FAOXC201C181x	-5.55805		G6PDH1rer	4.29703		EX_sph1p.e.	11.3753
FAOXC221C201x	-5.55805		OXAHCOtex	4.29703		SPH1Pte	11.3753
ESTRADIOLt	-5.53808		RTOTAL2CRNCPT2	4.26876		FAOXC161C141m	11.3444
ESTRONESt	-5.53808		DUTPDPn	4.26845		AGDC	11.3264
ESTSULT	-5.53808		FAOXC161C141m	4.23526		RE3002X	11.3161
EX_estradiol.e.	-5.53808		SPMDOX	4.2173		RE2988X	11.3161
BPNT	-5.53808		ASPGLUm	4.20652		RE2996X	11.3161
SADT	-5.53808		FAOXC141C121m	4.18877		RE2985X	11.3161
FACOAL1822	-5.52268		FAOXC101m	4.18877		RE2986X	11.3161
ADMDC	-5.52199		FAOXC121C101m	4.18877		RE2987X	11.3161
FAOXC16C14m	-5.49176		RE2973N	4.16714		CRNtim	11.3121
EX_estrones.e.	-5.49088		AGDC	4.16115		FAOXC141C121m	11.2979
ARACHDCOAtx	-5.48174		RE2974N	4.10096		FAOXC101m	11.2979
EX_so4.e.	-5.466		ASPTAm	4.00648		FAOXC121C101m	11.2979
TMDS	-5.43849		CITtbm	3.98876		ACGAMK	11.286
DHFR	-5.43846		r0909	3.76784		PTPAT	10.8816
DKMPPD	-5.4326		PEPCKm	3.76784		FAOXC14C12x	10.6901
LNELDCt	-5.42348		DMNONCRNt	3.26687		RE0577C	10.6413
THYMt	-5.41987		CHSTEROLt2	2.93318		EX_arach.e.	10.6413
TMDPP	-5.41987		CHSTEROLt3	2.93318		C6DCc	10.2638
CYTK12	-5.38934		CRNtx	2.93318		FAOXC225C226x	10.1209
FAOXC241C221x	-5.3666		ASCBt	2.38415		FAOXC225x	10.1209
MDRPD	-5.3473		DNDPt30m	3.73285e-26		FAOXC226C225x	10.1209
MTAP	-5.3473		CYTK6	9.32998e-27		FOAXC122C101x	10.1209
MTRI	-5.3473		GLNt4	8.31024e-27		FAOXC225C204x	10.1208
SPMS	-5.3473		r1936	7.87891e-27		FAOXC205C184x	10.1153
PMTCOAtx	-5.30299		ARTFR203	5.01686e-27		NADH2_u10m	10.0509
AACTtm	-5.2863		r1992	4.7548e-27		NADPHtxu	10.0393
AACTOOR	-5.2863		UMPK5n	4.68079e-27		NADPtxu	10.0393
CYTK12n	-5.26159		DNDPt61m	4.25793e-27		RE3000M	10.0385
CYTK14n	-5.26159		DNDPt18m	3.3245e-27		RE3001M	10.0385
CYTK3n	-5.26159		XOLEST2HSTDle	2.70182e-27		RE1521M	10.0385
CYTK6n	-5.25718		INSK	2.55284e-27		RE1526M	10.0385
NTD5	-5.22657		X25HVITD3t	2.44985e-27		RE1533M	10.0385
CYTK7n	-5.12481		EX_25hvitd3.e.	2.30223e-27		RE1573M	10.0385
UMPK4n	-5.12481		r1826	2.05211e-27		RE2999M	10.0385
UMPK7n	-5.12481		PIK5n	1.84521e-27		RE3003M	10.0385
UMPKn	-5.12481		r2381	1.68527e-27		RE3004M	10.0385
ACITL	-4.99924		GF6PTA	1.52452e-27		RE3005M	10.0385
LPS2	-4.87612		CYTK2	1.30343e-27		RE3006M	10.0385
FAOXC14C12x	-4.82684		ILEPHELAT2tc	9.71186e-28		RE3624M	10.0385
FAOXC16C14x	-4.82684		DNDPt33m	7.55012e-28		ADPACTD	10.0302
FAOXC102C103x	-4.54727		PRO1x	7.38584e-28		ADPCOACROT	10.0302
FAOXC102C81x	-4.54727		r2035	6.31357e-28		ADPCOAPTE	10.0302
FAOXC102x	-4.54727		DNDPt9m	5.6462e-28		C6DCCACT	10.0302
FAOXC103C102x	-4.3839		DESAT16_2	4.33411e-28		PGPPT	9.988
FAOXC123C102x	-4.3839		CTPtn	2.29781e-28		CDIPTr	9.988
FAOXC123x	-4.3839		r1910	1.35285e-28		r0591	9.95165
FAOXC143C123x	-4.3839		RETH1	1.12669e-28		KCCt	9.95165
FAOXC164C143x	-4.38146		ADK1m	1.04619e-28		NaKt	9.95165
FAOXC164C165x	-4.34339		FAOXC16080m	8.44612e-29		ADPACDAc	9.95165
FAOXC164x	-4.33617		DNDPt15m	4.67878e-29		C10DCCACT	9.95116
FAOXC165C164x	-4.33617		SERGLNNaEx	7.81643e-30		C10DCc	9.95116
FAOXC184C164x	-4.33617		AACOAT	1.15736e-30		SEBACACT	9.95116
FAOXC61C4x	-4.33617		DNDPt1m	2.20966e-33		SEBACIDTD	9.95116
FAOXC61x	-4.33617		GLNtN1	2.20966e-33		SEBCOACROT	9.95116
FAOXC81C61x	-4.33617		CYTK12	6.771e-34		SEBCOAPET	9.95116
DLNLCGt	-4.07197		CYTK9	1.554e-34		CYOR_u10m	9.90193
FAOXC226205x	-3.98795		FAOXC16080x	9.509e-35		CSm	9.88446
EX_dlnlcg.e.	-3.97277		ORNALArBATtc	5.90154e-35		CYOOm2	9.85625
DESAT20_1	-3.97277		r1916	5.772e-35		LPS2	9.84666
FACOAL203	-3.96176		RE2675C	4.958e-35		IPDPtx	9.84108
AKGMALtm	-3.90193		r1732	4.218e-35		DEDOLP1_L	9.80796
FAS180COA	-3.73484		MOGAT	3.01748e-42		DEDOLP2_L	9.80796
STCOAtx	-3.7055		r1989	3.00859e-42		DEDOLR_L	9.80796
KAS8	-3.68801		TMDK1	2.05669e-42		DOLK_L	9.80796
ARTFR202	-3.64686		r2031	1.46954e-43		FT	9.80796
ARTFR211	-3.64686		r1817	7.09864e-44		GGT_L	9.80796
ARTFR212	-3.64686		NADS2	6.68376e-44		r0488	9.76481
FAOXC101C102x	-3.55141		r1779	6.67284e-44		ARACHt	9.75728
FAOXC101C8x	-3.51829		NADtm	6.67254e-44		CHOLtu	9.74746
FAOXC101x	-3.51829		r2046	6.14202e-45		EX_chol.e.	9.74746
FAOXC102C101x	-3.51829		r1823	6.14202e-45		METS	9.73645
FAOXC122x	-3.51829		RTOTAL3FATPc	6.14202e-45		EX_pe_hs.e.	9.73644
FAOXC142C122x	-3.51829		r1723	6.14202e-45		PEt	9.73644
FAOXC163C142x	-3.51829		NTD1	6.14202e-45		AHC	9.73644
PEHSFABPe	-3.51138		r1690	6.14182e-45		METAT	9.73644
AHCYStr	-3.51138		FBP	6.14182e-45		ADPtx	9.73634
AMETr	-3.51138		THRGLNNaEx	6.14182e-45		ATPtx	9.73634
PCHOL_HSter	-3.51138		SERt4	6.14182e-45		CO2tp	9.73634
PETOHMr_hs	-3.51138		r2375	4.85075e-45		DPMVDx	9.73634
IPDPtx	-3.50887		r2071	4.85075e-45		MEVK1x	9.73634
FUMm	-3.50389		PI45P5Pn	4.85075e-45		PItx	9.73634
DEDOLP1_L	-3.45151		r1893	4.85075e-45		PMEVKx	9.73634
DEDOLP2_L	-3.45151		r1953	4.85075e-45		r0954	9.73634
DEDOLR_L	-3.45151		r2016	2.64514e-45		KAS8	9.71798
DOLK_L	-3.45151		r2048	2.39792e-45		ASPTAm	9.71789
FT	-3.45151		r1841	3.12217e-46		FAOXC180	9.69237
GGT_L	-3.45151		r1749	3.12217e-46		ARACHCPT1	9.69233
FAOXC163C164x	-3.40266		THRGLYexR	3.12217e-46		ARACHCPT2	9.69233
ASPGLUm	-3.39946		r1822	3.12217e-46		ARACHCRNt	9.69233
ASPTAm	-3.39946		DNDPt11m	3.12217e-46		FAOXC200180m	9.69233
MDH	-3.38842		r1963	2.71985e-46		ARTPLM2	9.69233
FUM	-3.36959		r2028	2.71958e-46		FAOXC102C103x	9.68871
LPS3	-3.36624		ALAt4	2.71941e-46		FAOXC102C81x	9.68871
CSm	-3.3416		DCTPtn	2.71941e-46		FAOXC102x	9.68871
ASPTA	-3.32618		r0853	2.71941e-46		FAOXC103C102x	9.68871
FAOXC163x	-3.3226		r2386	2.58453e-46		FAOXC123C102x	9.68871
FAOXC164C163x	-3.30813		r1677	2.58385e-46		FAOXC123x	9.68871
FAOXC184C163x	-3.3032		r1808	2.58385e-46		FAOXC143C123x	9.68871
FAOXC184x	-3.3032		r1717	2.58385e-46		FAOXC164C143x	9.68871
FAOXC204C205x	-3.3032		r1903	1.86469e-46		FAOXC164C165x	9.68871
FAOXC205C184x	-3.3032		r2023	1.58566e-46		FAOXC164x	9.68871
FAOXC225C204x	-3.3032		r1639	1.58566e-46		FAOXC165C164x	9.68871
FAOXC225C226x	-3.26636		r1825	1.58566e-46		FAOXC184C164x	9.68871
FAOXC225x	-3.26636		r2018	4.78324e-47		FAOXC61C4x	9.68871
FAOXC226C225x	-3.26636		NADHtpu	3.40831e-47		FAOXC61x	9.68871
FOAXC122C101x	-3.26636		SERALANaEx	3.30596e-47		FAOXC81C61x	9.68871
NADH2_u10m	-3.26481		r2032	1.24101e-47		ASPGLUm	9.68826
ARTPLM2	-3.23156		SERGLYexR	1.00564e-47		ASPTA	9.68788
MDHm	-3.22869		r1843	8.95056e-48		SO4OXAtex2	9.64338
GLYK	-3.16728		r1830	3.72347e-48		LPS3	9.61227
NADtx	-3.14341		NACHORCTL3le	3.38636e-48		GLYtm	9.60391
CDIPTr	-3.12692		CTPS2	3.14328e-48		AACTOOR	9.59813
EX_pglyc_hs.e.	-3.12692		r1934	3.09944e-48		GLYK	9.5978
PGLYCt	-3.12692		ARTFR202	2.64496e-48		EX_pglyc_hs.e.	9.59287
PGPP_hs	-3.12692		r1720	2.34508e-48		PGLYCt	9.59287
PGPPT	-3.12692		r1829	9.53085e-49		PGPP_hs	9.59287
FAOXC180x	-3.05653		ALAATB0tc	9.23413e-49		GLYATm	9.57307
ARTFR213	-3.04046		r2041	8.81497e-49		AOBUTDsm	9.57307
ARACHt	-3.03778		r1924	8.30672e-49		AACTtm	9.57307
RE0577C	-3.03774		r1940	5.60016e-49		GHMT2r	9.56584
EX_arach.e.	-3.03774		NTD11	4.77083e-49		C204CPT2	9.55862
ARACHCPT1	-2.96199		r2003	4.36948e-49		C204CRNt	9.55862
ARACHCPT2	-2.96199		SERASNNaEx	4.36948e-49		FAOXC204	9.55862
ARACHCRNt	-2.88044		DNDPt25m	4.36945e-49		DCSPTN1CPT1	9.55862
FAOXC180	-2.88044		DNDPt27m	4.25041e-49		STRDNCCPT1	9.55862
EX_pe_hs.e.	-2.61232		DNDPt3m	3.76032e-49		STRDNCCPT2	9.55862
PEt	-2.61232		DGTPtn	2.78695e-49		STRDNCCRNt	9.55862
AHC	-2.61225		DESAT18_7	1.16377e-49		DCSPTN1CRNt	9.55862
METAT	-2.61225		DNDPt21m	1.11604e-49		DCSPTN1CPT2	9.55862
METS	-2.61222		DNDPt12m	1.09716e-49		FAOXC2252053m	9.55862
CHOLtu	-2.60167		r2055	8.64642e-50		FAOXC2051843m	9.55862
EX_chol.e.	-2.60167		r1974	8.49894e-50		FAOXC18480m	9.55862
FAOXC200180m	-2.57747		r1806	7.46394e-50		C204CPT1	9.55862
CYOR_u10m	-2.5018		MCD	7.26156e-50		AKGMALtm	9.55422
CYOOm2	-2.32229		GMPR	5.93347e-50		FAOXC204C205x	9.4238
RTOTALCRNCPT1	-2.31048		ALCD22_D	5.66801e-50		G6PDH2rer	9.42184
RTOTALCRNCPT2	-2.31048		r1920	5.54235e-50		G6PDH1rer	9.42184
RTOTALCRNt	-2.31048		ALACYSNaEx	5.32925e-50		OXAHCOtex	9.42184
ARTPLM1m	-2.31048		r2030	5.32889e-50		FAOXC163C164x	9.38503
ATP2ter	-2.20174		r2037	5.32739e-50		FAOXC163x	9.38503
COAtr	-2.20174		ASNGLNNaEx	5.13211e-50		FAOXC164C163x	9.38503
O2ter	-2.20174		DADNK	4.70948e-50		FAOXC184C163x	9.38503
r0936	-2.20174		r1976	4.60078e-50		FAOXC184x	9.38503
r0937	-2.20174		r2051	4.44708e-50		FAOXC163C142x	9.28985
FAOXC10DCC8DCx	-2.20174		r1752	4.44708e-50		FAOXC142C122x	9.25057
FAOXC12DCC10DCx	-2.20174		DNDPt34m	3.46431e-50		FAOXC122x	9.23949
FAOXC14DCC12DCx	-2.20174		GLYt4	3.46198e-50		FAOXC102C101x	9.19243
FAOXC16DCC14DCx	-2.20174		r1733	3.46174e-50		FAOXC101x	9.19243
FAOXC16DCr	-2.20174		ME2m	3.24594e-50		r0937	8.70131
FAOXC16OHC16r	-2.20174		PPCOACm	3.24594e-50		SUCCOAPET	8.6931
FAOXC6DCC4DCx	-2.20174		PI5P4Kn	3.24529e-50		ATP2ter	8.68007
FAOXC8DCC6DCx	-2.20174		r1769	3.16063e-50		COAtr	8.68007
FAOXOHC16C16DCc	-2.20174		PLA2_2	2.67361e-50		r0936	8.68007
HEXDIACTD	-2.20174		r1961	2.67361e-50		FAOXC101C8x	8.67411
SUCCTD	-2.18871		r0028	2.49728e-50		OMHPALTD	8.5896
HEXDICOAACBPx	-2.18871		r1772	1.85936e-50		HEXDICOAACBPx	8.56007
OMHPALTD	-2.18871		r1915	1.85934e-50		FAOXOHC16C16DCc	8.53783
SUCCOAPET	-2.18871		r1929	1.85934e-50		HEXDIACTD	8.53783
NADPHtxu	-2.15922		r1734	1.64054e-50		FAOXC101C102x	8.47455
NADPtxu	-2.15922		PIK4	1.58004e-50		FAOXC6DCC4DCx	8.4363
r0488	-1.9712		DNDPt5m	1.57968e-50		FAOXC8DCC6DCx	8.4363
CO2tp	-1.94968		r1722	1.57923e-50		RE3050R	8.24843
DPMVDx	-1.94968		r1702	1.57921e-50		RE3421R	8.24843
MEVK1x	-1.94968		DNDPt36m	1.57919e-50		RE3524R	8.24843
PItx	-1.94968		THRATB0tc	1.57919e-50		C9BRxtc	8.24843
PMEVKx	-1.94968		DNDPt57m	1.57906e-50		LEUPHELAT2tc	8.24843
r0954	-1.94968		r1955	1.57819e-50		AHCYStd	8.24843
ADPtx	-1.94968		r1945	1.57804e-50		AMETtd	8.24843
ATPtx	-1.94968		r1981	1.57782e-50		CHSTEROLtrc	8.24843
MM5cg	-1.58782e-26		r1682	1.57782e-50		FRDPtcr	8.24843
MM6B1bg	-1.10541e-26		PI3P3Pn	1.57782e-50		RE2658R	8.19321
BDMT_L	-9.46194e-27		DNDPt35m	1.57782e-50		RE2660C	8.19321
G12MT1_L	-9.02154e-27		DNDPt14m	1.31224e-50		RE2655R	8.1631
G13MT_L	-8.8233e-27		r1954	1.31222e-50		RE2651R	8.10768
G16MT_L	-7.79434e-27		HISyLATtc	1.31222e-50		RE1901R	7.73091
GALC	-7.57655e-27		BPNT2	1.31222e-50		RE2079R	7.73091
DOLASNT_Ler	-7.49026e-27		r2043	1.05667e-50		FAOXC14DCC12DCx	7.49421
DOLPGT2_Ler	-7.10583e-27		TRPATB0tc	9.56183e-51		FAOXC16DCC14DCx	7.49421
r0360	-6.92948e-27		DNDPt19m	9.03007e-51		FAOXC16DCr	7.49421
RTOTAL2CRNCPT1	-6.72954e-27		r0060	6.5189e-51		FAOXC16OHC16r	7.49421
RTOTAL2CRNCPT2	-6.44623e-27		r1757	6.5189e-51		FAOXC12DCC10DCx	7.45366
ARTPLM2m	-5.53568e-27		r1784	6.29195e-51		FAOXC10DCC8DCx	7.44173
S26Tg	-4.86885e-27		r1751	6.28787e-51		SUCCTD	7.44173
S2L2FN2M2MASNt	-4.5919e-27		r1900	6.28787e-51		O2ter	7.44173
G14Tg	-3.8867e-27		NDP8	6.28787e-51		RE1709C	7.4331
F6Tg	-3.47403e-27		RETH2	6.28787e-51		RE0830C	7.39439
M13N2Tg	-3.33156e-27		PI4P5Kn	6.28787e-51		UROLACer	7.17408
GMAND	-3.18646e-27		r1763	5.90946e-51		GLRASE	7.1136
GFUCS	-2.67067e-27		ARTFR33	4.07733e-51		GULLACter	7.1136
M16NTg	-2.51673e-27		r1986	3.30578e-51		L_LACt2r	7.1136
M1316Mg	-2.43825e-27		r2054	3.30554e-51		L_LACt4r	7.1136
GDPFUCtg	-2.04533e-27		CYSSERNaEx	1.82647e-51		PE_HSter	7.1136
GMPtg	-1.99192e-27		r1735	1.6402e-51		PYRt2r	7.1136
GDPtg	-1.73862e-27		r1675	1.2042e-51		RETI1	7.1136
RETNtr2	-1.67043e-27		r2014	1.13854e-51		SUCCtp	7.1136
RE2659R	-1.59839e-27		LCADi	7.14254e-52		FRDPtr	7.05858
r0311	-1.48333e-27		r1754	6.87611e-52		GLACter	7.05858
PMTCOAFABP1tc	-1.41613e-27		SERCYSNaEx	4.69823e-52		GLNLASEer	7.05858
LNLCt	-1.40819e-27		PIK4n	4.69765e-52		EX_pyr.e.	6.26215
r1257	-1.33502e-27		r1726	4.69619e-52		FRDPtc	6.26215
r1318	-1.07686e-27		r1898	4.69548e-52		EX_lac_L.e.	5.32144
r2511	-1.07469e-27		ASNALANaEx	4.69548e-52		DMNONCRNt	3.26687
r2513	-1.01368e-27		r1696	4.69548e-52		CHSTEROLt2	2.93318
DOLP_Lter	-9.52845e-28		FACOAL160i	4.69548e-52		CHSTEROLt3	2.93318
DOLPGT1_Ler	-9.3388e-28		r1930	4.66732e-52		CRNtx	2.93318
ENGASEly	-8.42685e-28		r1979	4.54732e-52		ASCBt	2.38415
G12MT2_L	-8.4199e-28		ACGALK2	4.54596e-52		ACGALK2	1.58782e-26
DOLPH_Ler	-8.28047e-28		X25HVITD3tin	4.54132e-52		X25HVITD3tin	1.10541e-26
DOLDPP_Ler	-8.27739e-28		ACP1_FMN_	4.19704e-52		ACP1_FMN_	9.46194e-27
DOLPMT1_Ler	-6.87327e-28		X25HVITD2tin	4.19704e-52		X25HVITD2tin	9.02154e-27
DOLPMT_L	-6.50961e-28		X25HVITD2tm	4.19704e-52		X25HVITD2tm	8.8233e-27
Asn_X_Ser_Thrtr	-6.30386e-28		ACNMLr	4.19704e-52		ACNMLr	7.79434e-27
GASNASEly	-5.57355e-28		X25HVITD3tm	3.43153e-52		X25HVITD3tm	7.57655e-27
S2L2N2M2MASNtly	-5.53875e-28		X3HBCDm	1.16253e-52		X3HBCDm	7.49026e-27
DOLPMT2_Ler	-5.15202e-28		X25HVITD3tin_m	1.1467e-52		X25HVITD3tin_m	7.10583e-27
GALASE1ly	-5.01091e-28		X25HVITD2t	1.01483e-52		X25HVITD2t	6.92948e-27
SIAASEly	-4.53644e-28		ACNAM9PL	5.52705e-53		ACNAM9PL	6.72954e-27
B_MANNASEly	-4.47831e-28		ACNAMlt	5.51648e-53		ACNAMlt	6.44623e-27
MANter	-3.98844e-28		ACNAM9PL2	5.51648e-53		ACNAM9PL2	5.53568e-27
MM8Ber	-3.81186e-28		ACGAM6PSi	4.95672e-53		ACGAM6PSi	4.86885e-27
MM7B2g	-3.55238e-28		AICART	4.93758e-53		AICART	4.5919e-27
M7MASNBterg	-3.45835e-28		Asn_X_Ser_Thrtr	4.93632e-53		Asn_X_Ser_Thrtr	3.8867e-27
M4MPDOL_Lter	-3.3523e-28		X25HVITD2tin_m	4.82768e-53		X25HVITD2tin_m	3.47403e-27
MI34PP	-3.1361e-28		ACGALtly	4.82352e-53		ACGALtly	3.33156e-27
MI3PP	-2.87872e-28		ACGALK	4.82338e-53		ACGALK	3.18646e-27
MI134PP	-2.78051e-28		ACCOACm	4.82338e-53		ACCOACm	2.67067e-27
MI134PK	-2.58598e-28		ACCOAtr	4.82316e-53		ACCOAtr	2.51673e-27
MI1346Ptn	-2.58137e-28		ACGAMtly	4.8065e-53		ACGAMtly	2.43825e-27
MI1346PKn	-2.5098e-28		ACGAM2E	4.79105e-53		ACGAM2E	2.04533e-27
STRDNCCPT1	-2.12021e-28		ACNAMtn	4.79105e-53		ACNAMtn	1.99192e-27
LNLNCACPT1	-2.08753e-28		AG13T1g	4.77425e-53		AG13T1g	1.73862e-27
LNLNCACRNt	-2.06266e-28		AHEXASEly	2.0646e-53		AHEXASEly	1.67043e-27
C4DCCACT	-2.01704e-28		A_MANASEly	2.0646e-53		A_MANASEly	1.59839e-27
FAOXC4C4DCc	-1.78284e-28		AG13T2g	1.79928e-53		AG13T2g	1.48333e-27
SUCCCROT	-1.73448e-28		AG13T3g	4.49774e-54		AG13T3g	1.41613e-27
DCSPTN1CPT1	-1.67816e-28		BDMT_L	1.53072e-54		BDMT_L	1.40819e-27
DCSPTN1CPT2	-1.67318e-28		ARTCOAL2	1.53072e-54		ARTCOAL2	1.33502e-27
FAOXC18480m	-1.61817e-28		ACYP	1.53072e-54		ACYP	1.07686e-27
FAOXC2242046m	-1.51896e-28		C160CRNt	1.53072e-54		C160CRNt	1.07469e-27
ADRNCPT2	-1.35029e-28		ARACHDtr	1.53072e-54		ARACHDtr	1.01368e-27
C204CPT1	-1.20743e-28		CMPACNAtg	7.65793e-55		CMPACNAtg	9.52845e-28
C204CRNt	-1.16019e-28		B_MANNASEly	7.65793e-55		B_MANNASEly	9.3388e-28
MAN1PT2	-9.7624e-29		ACNAMPH	7.25298e-55		ACNAMPH	8.42685e-28
PMANM	-9.26622e-29		C160CPT2	6.1328e-55		C160CPT2	8.4199e-28
ARACHDtr	-9.25747e-29		CORE5GTg	5.22602e-55		CORE5GTg	8.28047e-28
ARTCOAL2	-7.84677e-29		CLS_hs	5.08476e-55		CLS_hs	8.27739e-28
ARTCOAL3	-7.75137e-29		CORE8GTg	5.05796e-55		CORE8GTg	6.87327e-28
AVITE1t	-7.34192e-29		AMANK	5.05796e-55		AMANK	6.50961e-28
AVITE2t	-6.97328e-29		BILIRUBtr	4.85475e-55		BILIRUBtr	6.30386e-28
BILIRUBtr	-6.0343e-29		AMPtp	4.85475e-55		AMPtp	5.57355e-28
BPNT2	-5.87638e-29		C14STRr	4.83971e-55		C14STRr	5.53875e-28
BVITEt	-5.49796e-29		AVITE2t	4.0983e-55		AVITE2t	5.15202e-28
C14STRr	-5.10756e-29		CORE7GTg	4.09813e-55		CORE7GTg	5.01091e-28
C204CPT2	-3.68827e-29		CSCPASEly	4.09813e-55		CSCPASEly	4.53644e-28
CBR2	-3.2753e-29		AVITE1t	4.09813e-55		AVITE1t	4.47831e-28
CEPTC	-3.08443e-29		CMPACNAtn	1.24789e-55		CMPACNAtn	3.98844e-28
CHLPCTD	-2.89833e-29		BVITEt	1.22959e-55		BVITEt	3.81186e-28
CHSTEROLt1	-2.48282e-29		CSPG_Etly	1.21116e-55		CSPG_Etly	3.55238e-28
CMPSAS	-7.17698e-30		CHSTEROLt1	1.21116e-55		CHSTEROLt1	3.45835e-28
CO2ter	-2.035e-31		CSEPASEly	6.12132e-57		CSEPASEly	3.3523e-28
CORE5GTg	-5.476e-32		DESAT24_1	1.09394e-57		DESAT24_1	3.1361e-28
CORE7GTg	-2.7084e-33		DOLPMT2_Ler	1.09394e-57		DOLPMT2_Ler	2.87872e-28
CORE8GTg	-1.2262e-33		CO2ter	1.09394e-57		CO2ter	2.78051e-28
CRNCAR3tp	-8.88e-34		CMPSASn	1.09394e-57		CMPSASn	2.58598e-28
CSCPASEly	-4.255e-34		CBR2	1.09394e-57		CBR2	2.58137e-28
CSDPASEly	-7.23019e-42		CSPG_Dtly	1.09394e-57		CSPG_Dtly	2.5098e-28
CSEPASEly	-3.59519e-42		CSDPASEly	4.8745e-58		CSDPASEly	2.12021e-28
CSNATer	-8.99325e-43		CSPG_Ctly	2.71364e-58		CSPG_Ctly	2.08753e-28
CSPG_Ctly	-8.17581e-43		CSNATer	1.59756e-58		CSNATer	2.06266e-28
CSPG_Dtly	-2.24928e-43		CORE2GTg	1.36697e-59		CORE2GTg	2.01704e-28
CSPG_Etly	-2.2467e-43		CMPSAS	1.11421e-59		CMPSAS	1.78284e-28
D3AIBTm	-2.24662e-43		DHCR242r	3.67856e-60		DHCR242r	1.73448e-28
DESAT18_4	-2.2466e-43		ARTCOAL3	2.42567e-62		ARTCOAL3	1.67816e-28
DESAT24_1	-2.24651e-43		DOLP_Lter	9.51992e-63		DOLP_Lter	1.67318e-28
DGCHOLte	-2.24633e-43		CRNCAR3tp	5.62646e-63		CRNCAR3tp	1.61817e-28
DHCR241r	-2.24581e-43		EBP1r	1.65039e-63		EBP1r	1.51896e-28
DHCR242r	-2.24577e-43		DOLMANP_Lter	1.14028e-63		DOLMANP_Lter	1.35029e-28
DOPASFt	-2.24577e-43		DESAT18_4	1.04534e-64		DESAT18_4	1.20743e-28
DOPASULT	-2.24422e-43		DGCHOLte	7.02748e-65		DGCHOLte	1.16019e-28
EBP1r	-2.24325e-43		DOLPMT_L	3.58873e-89		DOLPMT_L	9.7624e-29
EBP2r	-2.24299e-43		DOLDPP_Ler	3.58873e-89		DOLDPP_Ler	9.26622e-29
EX_25hvitd3.e.	-8.02957e-44		DOPASULT	0		DOPASULT	9.25747e-29
EX_akg.e.	-8.02957e-44		DOLASNT_Ler	0		DOLASNT_Ler	7.84677e-29
EX_asp_L.e.	-8.02641e-44		D3AIBTm	0		D3AIBTm	7.75137e-29
EX_avite1.e.	-5.33339e-44		DHCR241r	0		DHCR241r	7.34192e-29
EX_avite2.e.	-2.39082e-45		DESAT18_8	0		DESAT18_8	6.97328e-29
EX_bvite.e.	-5.81368e-46		EBP2r	0		EBP2r	6.0343e-29
EX_cspg_c.e.	-3.99176e-46		DOLPMT3_Ler	0		DOLPMT3_Ler	5.87638e-29
EX_cspg_d.e.	-3.99107e-46		DOLPMT1_Ler	0		DOLPMT1_Ler	5.49796e-29
EX_cspg_e.e.	-3.99002e-46		DOLPGT2_Ler	0		DOLPGT2_Ler	5.10756e-29
EX_dopa.e.	-3.99002e-46		DOPASFt	0		DOPASFt	3.68827e-29
EX_dopasf.e.	-3.07967e-46		DTMPK	0		DTMPK	3.2753e-29
EX_fe2.e.	-3.07948e-46		DOLPGT1_Ler	0		DOLPGT1_Ler	3.08443e-29
EX_hspg.e.	-2.23375e-46		DOLPH_Ler	0		DOLPH_Ler	2.89833e-29
EX_ksii_core4.e.	-2.23369e-46		ENGASEly	0		ENGASEly	2.48282e-29
EX_nrpphr.e.	-2.22257e-46		EX_akg.e.	0		EX_akg.e.	7.17698e-30
EX_nrpphrsf.e.	-2.20409e-46		EX_thr_L.e.	0		EX_thr_L.e.	2.035e-31
EX_pnto_R.e.	-1.21047e-46		EX_his_L.e.	0		EX_his_L.e.	5.476e-32
EX_prostge1.e.	-5.67799e-47		MI1PS	0		MI1PS	2.7084e-33
EX_prostge2.e.	-2.3904e-47		EX_oxa.e.	0		EX_oxa.e.	1.2262e-33
EX_prostgf2.e.	-1.96366e-47		EX_trp_L.e.	0		EX_trp_L.e.	8.88e-34
EX_pydam.e.	-1.87973e-47		EX_chsterol.e.	0		EX_chsterol.e.	4.255e-34
EX_pydx.e.	-1.86117e-47		EX_gchola.e.	0		EX_gchola.e.	7.23019e-42
EX_pydxn.e.	-1.38733e-47		H2Otg	0		H2Otg	3.59519e-42
EX_tethex3.e.	-1.38186e-47		r0193	0		r0193	8.99325e-43
EX_tetpent3.e.	-9.84202e-48		UDPGALt2g	0		UDPGALt2g	8.17581e-43
EX_yvite.e.	-9.83261e-48		M1316Mg	0		M1316Mg	2.24928e-43
FACOAL180i	-9.83244e-48		MM8Cg	0		MM8Cg	2.2467e-43
FACOAL181i	-6.80513e-48		MM5ag	0		MM5ag	2.24662e-43
FACOAL1821	-6.69341e-48		M8MASNterg	0		M8MASNterg	2.2466e-43
FACOAL200	-6.68976e-48		MM7Cbg	0		MM7Cbg	2.24651e-43
FACOAL245_2	-6.68976e-48		MM6bg	0		MM6bg	2.24633e-43
FACOAL246_1	-6.68976e-48		M7MASNBterg	0		M7MASNBterg	2.24581e-43
FADH2tru	-6.14278e-48		MM7B2g	0		MM7B2g	2.24577e-43
FADtru	-5.66422e-48		M13N2Tg	0		M13N2Tg	2.24577e-43
FAOXC160	-5.65853e-48		MM8Ber	0		MM8Ber	2.24422e-43
FAOXC204	-5.65853e-48		MANter	0		MANter	2.24325e-43
FBP26	-5.6534e-48		MM6B1bg	0		MM6B1bg	2.24299e-43
G6PDH1rer	-5.63755e-48		C4DCCACT	0		C4DCCACT	8.02957e-44
G6PDH2rer	-5.63641e-48		FAOXC4C4DCc	0		FAOXC4C4DCc	8.02957e-44
GALASE20ly	-5.61867e-48		SUCCCROT	0		SUCCCROT	8.02641e-44
GLCAASE1ly	-5.25307e-48		DURAD2	0		DURAD2	5.33339e-44
GLCAASE5ly	-5.10479e-48		r0679	0		r0679	2.39082e-45
GLCAASE6ly	-5.10152e-48		MANtly	0		MANtly	5.81368e-46
GLCAASE7ly	-4.96982e-48		C12DCACT	0		C12DCACT	3.99176e-46
GLCNACASE1ly	-3.05574e-48		FAOXC12DCx	0		FAOXC12DCx	3.99107e-46
GLCNACASE2ly	-2.55503e-48		FAOXC12DCTc	0		FAOXC12DCTc	3.99002e-46
GLCNACASE3ly	-1.56989e-48		FAOXC12DCc	0		FAOXC12DCc	3.99002e-46
GLCNACASE4ly	-1.56869e-48		ARGNm	0		ARGNm	3.07967e-46
GLCNACASE5ly	-1.5621e-48		UREAtm	0		UREAtm	3.07948e-46
GLNt4	-1.53362e-48		COAtl	0		COAtl	2.23375e-46
GLUTCOADHm	-1.52861e-48		Htg	0		Htg	2.23369e-46
GLYC3Ptm	-1.52846e-48		r1150	0		r1150	2.22257e-46
GLYCtm	-1.52822e-48		DPCOAtl	0		DPCOAtl	2.20409e-46
GNDer	-1.52727e-48		ADSL2	0		ADSL2	1.21047e-46
GTHOm	-1.52672e-48		SO4tl	0		SO4tl	5.67799e-47
HOMt4	-1.52465e-48		EX_tchola.e.	0		EX_tchola.e.	2.3904e-47
[truncated: 2,230 more rows]

## Sheet: OverallPathContrib
Pathways	21 and under		Pathways	22-49 years		Pathways	50 and over
Transport, extracellular	22.9544		Transport, extracellular	31.5462		Transport, extracellular	17.5673
Transport, mitochondrial	30.6591		Transport, mitochondrial	41.7546		Transport, mitochondrial	24.5949
Pyrimidine catabolism	24.6717		Pyrimidine catabolism	29.8336		Pyrimidine catabolism	21.552
Sphingolipid metabolism	14.1057		Sphingolipid metabolism	18.4281		Sphingolipid metabolism	16.7208
Butanoate metabolism	43.0855		Butanoate metabolism	51.4224		Butanoate metabolism	35.9092
Cytochrome metabolism	36.2062		Cytochrome metabolism	41.7134		Cytochrome metabolism	41.2366
N-glycan degradation	5.06114		N-glycan degradation	6.22953		N-glycan degradation	4.3185
Propanoate metabolism	30.0293		Propanoate metabolism	31.2349		Propanoate metabolism	27.1326
Pentose phosphate pathway	48.811		Pentose phosphate pathway	64.7285		Pentose phosphate pathway	46.4663
Valine, leucine, and isoleucine metabolism	48.4086		Valine, leucine, and isoleucine metabolism	57.4431		Valine, leucine, and isoleucine metabolism	32.6796
Tryptophan metabolism	15.4719		Tryptophan metabolism	17.4234		Tryptophan metabolism	15.298
Cholesterol metabolism	23.763		Cholesterol metabolism	26.7582		Cholesterol metabolism	17.9748
Fatty acid oxidation	19.8569		Fatty acid oxidation	29.3889		Fatty acid oxidation	16.5452
Transport, peroxisomal	52.2627		Transport, peroxisomal	55.7752		Transport, peroxisomal	35.2916
Exchange	30.0173		Exchange	36.8341		Exchange	23.8049
Transport, endoplasmic reticular	33.9524		Transport, endoplasmic reticular	42.8323		Transport, endoplasmic reticular	22.7438
Aminosugar metabolism	18.9626		Aminosugar metabolism	25.2722		Aminosugar metabolism	21.1581
Transport, lysosomal	18.8894		Transport, lysosomal	21.511		Transport, lysosomal	7.17603
Citric acid cycle	65.5719		Citric acid cycle	74.6179		Citric acid cycle	60.634
Transport, nuclear	38.2685		Transport, nuclear	48.3433		Transport, nuclear	32.0595
Vitamin B2 metabolism	34.1776		Vitamin B2 metabolism	54.2269		Vitamin B2 metabolism	48.6114
Glycolysis/gluconeogenesis	51.8058		Glycolysis/gluconeogenesis	63.6888		Glycolysis/gluconeogenesis	43.0582
Purine catabolism	25.1544		Purine catabolism	31.853		Purine catabolism	22.7139
Nucleotide interconversion	48.0109		Nucleotide interconversion	56.3586		Nucleotide interconversion	41.4513
Arginine and Proline Metabolism	33.8836		Arginine and Proline Metabolism	39.7116		Arginine and Proline Metabolism	18.2988
Nucleotide salvage pathway	64.1198		Nucleotide salvage pathway	65.8021		Nucleotide salvage pathway	70.7564
Keratan sulfate synthesis	3.99775e-30		Keratan sulfate synthesis	7.86117e-29		Keratan sulfate synthesis	3.1622e-52
Methionine and cysteine metabolism	29.9367		Methionine and cysteine metabolism	36.789		Methionine and cysteine metabolism	29.39
Purine synthesis	13.2456		Purine synthesis	11.0361		Purine synthesis	5.68541
Alanine and aspartate metabolism	54.3564		Alanine and aspartate metabolism	70.7962		Alanine and aspartate metabolism	47.7796
Miscellaneous	16.3033		Miscellaneous	18.5102		Miscellaneous	9.3321
Pyruvate metabolism	38.1473		Pyruvate metabolism	48.9341		Pyruvate metabolism	22.2689
Eicosanoid metabolism	5.2797		Eicosanoid metabolism	6.08024		Eicosanoid metabolism	2.66846
Glutathione metabolism	42.7818		Glutathione metabolism	60.2624		Glutathione metabolism	43.9642
R group synthesis	19.9187		R group synthesis	15.0141		R group synthesis	0
Unassigned	49.5934		Unassigned	74.1432		Unassigned	40.744
Vitamin C metabolism	43.1447		Vitamin C metabolism	43.0924		Vitamin C metabolism	18.4265
Pyrimidine synthesis	48.3365		Pyrimidine synthesis	62.8135		Pyrimidine synthesis	43.2658
Oxidative phosphorylation	51.8244		Oxidative phosphorylation	58.0378		Oxidative phosphorylation	45.4251
N-glycan synthesis	11.0645		N-glycan synthesis	13.033		N-glycan synthesis	6.34313
Biotin metabolism	17.9557		Biotin metabolism	20.3788		Biotin metabolism	15.7582
ROS detoxification	58.98		ROS detoxification	67.7893		ROS detoxification	44.7829
Glycerophospholipid metabolism	23.9958		Glycerophospholipid metabolism	31.9922		Glycerophospholipid metabolism	21.3877
Transport, golgi apparatus	8.56955e-44		Transport, golgi apparatus	3.97019e-29		Transport, golgi apparatus	6.34027e-46
O-glycan synthesis	7.31875e-51		O-glycan synthesis	2.46463e-28		O-glycan synthesis	2.77767e-53
Chondroitin sulfate degradation	0		Chondroitin sulfate degradation	2.78027e-29		Chondroitin sulfate degradation	0
Fatty acid synthesis	18.1786		Fatty acid synthesis	22.2117		Fatty acid synthesis	13.5238
Triacylglycerol synthesis	26.7458		Triacylglycerol synthesis	38.31		Triacylglycerol synthesis	29.5766
Folate metabolism	14.7642		Folate metabolism	17.5475		Folate metabolism	11.1362
Tetrahydrobiopterin metabolism	34.8803		Tetrahydrobiopterin metabolism	39.0473		Tetrahydrobiopterin metabolism	19.5777
Tyrosine metabolism	3.97325		Tyrosine metabolism	4.5421		Tyrosine metabolism	3.19288
Steroid metabolism	38.3204		Steroid metabolism	41.8736		Steroid metabolism	42.4227
Exchange/demand reaction	49.7006		Exchange/demand reaction	58.0459		Exchange/demand reaction	40.7681
Fructose and mannose metabolism	34.8999		Fructose and mannose metabolism	35.0822		Fructose and mannose metabolism	24.0024
Keratan sulfate degradation	1.05658		Keratan sulfate degradation	1.21641		Keratan sulfate degradation	0.909372
Urea cycle	39.9126		Urea cycle	46.2183		Urea cycle	20.9472
Galactose metabolism	34.8944		Galactose metabolism	39.2781		Galactose metabolism	18.7931
Glycine, serine, alanine and threonine metabolism	63.062		Glycine, serine, alanine and threonine metabolism	69.091		Glycine, serine, alanine and threonine metabolism	37.2957
Heparan sulfate degradation	0		Heparan sulfate degradation	0		Heparan sulfate degradation	0
Hyaluronan metabolism	70.4953		Hyaluronan metabolism	92.163		Hyaluronan metabolism	51.6046
Glutamate metabolism	41.7487		Glutamate metabolism	51.1642		Glutamate metabolism	34.4124
Glyoxylate and dicarboxylate metabolism	18.3675		Glyoxylate and dicarboxylate metabolism	20.2946		Glyoxylate and dicarboxylate metabolism	15.4099
Vitamin B6 metabolism	0		Vitamin B6 metabolism	0		Vitamin B6 metabolism	0
Taurine and hypotaurine metabolism	8.23364e-51		Taurine and hypotaurine metabolism	2.53956e-50		Taurine and hypotaurine metabolism	7.16574e-52
C5-branched dibasic acid metabolism	67.5159		C5-branched dibasic acid metabolism	86.455		C5-branched dibasic acid metabolism	61.1796
Vitamin A metabolism	51.3609		Vitamin A metabolism	60.0985		Vitamin A metabolism	29.6988
Starch and sucrose metabolism	9.53464		Starch and sucrose metabolism	11.3215		Starch and sucrose metabolism	10.2914
Inositol phosphate metabolism	27.3298		Inositol phosphate metabolism	28.655		Inositol phosphate metabolism	14.9877
NAD metabolism	46.2984		NAD metabolism	59.2169		NAD metabolism	48.0712
CoA catabolism	30.0559		CoA catabolism	12.2417		CoA catabolism	0
CoA synthesis	16.3391		CoA synthesis	48.3672		CoA synthesis	2.13396e-45
D-alanine metabolism	0		D-alanine metabolism	0		D-alanine metabolism	0
beta-Alanine metabolism	8.99063		beta-Alanine metabolism	10.3202		beta-Alanine metabolism	4.3252
Thiamine metabolism	0		Thiamine metabolism	0		Thiamine metabolism	0
Cysteine Metabolism	7.34768e-44		Cysteine Metabolism	11.2845		Cysteine Metabolism	4.46598e-42
Vitamin D metabolism	49.745		Vitamin D metabolism	79.5012		Vitamin D metabolism	0
Phosphatidylinositol phosphate metabolism	10.3272		Phosphatidylinositol phosphate metabolism	14.014		Phosphatidylinositol phosphate metabolism	7.99627
Glycosphingolipid metabolism	2.22418e-44		Glycosphingolipid metabolism	28.5604		Glycosphingolipid metabolism	0
Arachidonic acid metabolism	0		Arachidonic acid metabolism	0		Arachidonic acid metabolism	0
Histidine metabolism	18.5683		Histidine metabolism	24.2846		Histidine metabolism	17.1207
Squalene and cholesterol synthesis	34.2896		Squalene and cholesterol synthesis	43.5614		Squalene and cholesterol synthesis	5.92559e-52
Heme synthesis	0		Heme synthesis	0		Heme synthesis	0
Lysine metabolism	0		Lysine metabolism	0		Lysine metabolism	0
Xenobiotics metabolism	0		Xenobiotics metabolism	0		Xenobiotics metabolism	0
Ubiquinone synthesis	0		Ubiquinone synthesis	0		Ubiquinone synthesis	0
Selenoamino acid metabolism	0		Selenoamino acid metabolism	0		Selenoamino acid metabolism	0
Nucleotide sugar metabolism	0		Nucleotide sugar metabolism	0		Nucleotide sugar metabolism	0
Linoleate metabolism	0		Linoleate metabolism	0		Linoleate metabolism	0
Limonene and pinene degradation	0		Limonene and pinene degradation	0		Limonene and pinene degradation	0
Heme degradation	0		Heme degradation	0		Heme degradation	0
Chondroitin synthesis	0		Chondroitin synthesis	0		Chondroitin synthesis	0
Blood group synthesis	0		Blood group synthesis	0		Blood group synthesis	0
Androgen and estrogen synthesis and metabolism	0		Androgen and estrogen synthesis and metabolism	0		Androgen and estrogen synthesis and metabolism	0
Alkaloid synthesis	0		Alkaloid synthesis	0		Alkaloid synthesis	0
Phenylalanine metabolism	0		Phenylalanine metabolism	0		Phenylalanine metabolism	0

## Sheet: Pathdifferences
Subsystems	21 - 2249		Subsystems	21-50		Subsystems	2249-50
CoA catabolism	17.8142		Vitamin D metabolism	49.745		Vitamin D metabolism	79.5012
R group synthesis	4.90468		Squalene and cholesterol synthesis	34.2896		CoA synthesis	48.3672
Purine synthesis	2.20954		CoA catabolism	30.0559		Squalene and cholesterol synthesis	43.5614
Vitamin C metabolism	0.0522904		Glycine, serine, alanine and threonine metabolism	25.7663		Hyaluronan metabolism	40.5584
Heparan sulfate degradation	0		Vitamin C metabolism	24.7182		Unassigned	33.3993
Vitamin B6 metabolism	0		Vitamin A metabolism	21.6622		Glycine, serine, alanine and threonine metabolism	31.7953
D-alanine metabolism	0		R group synthesis	19.9187		Vitamin A metabolism	30.3998
Thiamine metabolism	0		Urea cycle	18.9655		Glycosphingolipid metabolism	28.5604
Arachidonic acid metabolism	0		Hyaluronan metabolism	18.8906		Pyruvate metabolism	26.6652
Heme synthesis	0		Transport, peroxisomal	16.9711		C5-branched dibasic acid metabolism	25.2753
Lysine metabolism	0		CoA synthesis	16.3391		Urea cycle	25.2711
Xenobiotics metabolism	0		Galactose metabolism	16.1012		Valine, leucine, and isoleucine metabolism	24.7634
Ubiquinone synthesis	0		Pyruvate metabolism	15.8783		Vitamin C metabolism	24.6659
Selenoamino acid metabolism	0		Valine, leucine, and isoleucine metabolism	15.729		Alanine and aspartate metabolism	23.0166
Nucleotide sugar metabolism	0		Arginine and Proline Metabolism	15.5848		ROS detoxification	23.0063
Linoleate metabolism	0		Tetrahydrobiopterin metabolism	15.3027		Arginine and Proline Metabolism	21.4129
Limonene and pinene degradation	0		ROS detoxification	14.1971		Glycolysis/gluconeogenesis	20.6306
Heme degradation	0		Inositol phosphate metabolism	12.3421		Galactose metabolism	20.4849
Chondroitin synthesis	0		Transport, lysosomal	11.7134		Transport, peroxisomal	20.4836
Blood group synthesis	0		Transport, endoplasmic reticular	11.2087		Transport, endoplasmic reticular	20.0885
Androgen and estrogen synthesis and metabolism	0		Fructose and mannose metabolism	10.8976		Pyrimidine synthesis	19.5476
Alkaloid synthesis	0		Exchange/demand reaction	8.93253		Tetrahydrobiopterin metabolism	19.4696
Phenylalanine metabolism	0		Unassigned	8.84943		Pentose phosphate pathway	18.2622
Taurine and hypotaurine metabolism	-1.7162e-50		Glycolysis/gluconeogenesis	8.74756		Exchange/demand reaction	17.2778
Chondroitin sulfate degradation	-2.78027e-29		Purine synthesis	7.56022		Transport, mitochondrial	17.1596
Transport, golgi apparatus	-3.97019e-29		Glutamate metabolism	7.33633		Glutamate metabolism	16.7518
Keratan sulfate synthesis	-7.46139e-29		Butanoate metabolism	7.17631		Glutathione metabolism	16.2982
O-glycan synthesis	-2.46463e-28		Miscellaneous	6.97118		Transport, nuclear	16.2837
Keratan sulfate degradation	-0.15983		Alanine and aspartate metabolism	6.5768		Butanoate metabolism	15.5131
Fructose and mannose metabolism	-0.182241		Nucleotide interconversion	6.55958		R group synthesis	15.0141
Tyrosine metabolism	-0.568849		Oxidative phosphorylation	6.39925		Nucleotide interconversion	14.9073
Eicosanoid metabolism	-0.80054		C5-branched dibasic acid metabolism	6.33626		Transport, lysosomal	14.335
N-glycan degradation	-1.16839		Exchange	6.21237		Citric acid cycle	13.9839
Propanoate metabolism	-1.20559		Transport, nuclear	6.20902		Transport, extracellular	13.9789
Inositol phosphate metabolism	-1.3252		Transport, mitochondrial	6.06418		Inositol phosphate metabolism	13.6673
beta-Alanine metabolism	-1.32956		Cholesterol metabolism	5.78817		Exchange	13.0291
Nucleotide salvage pathway	-1.68236		Transport, extracellular	5.38711		Fatty acid oxidation	12.8436
Starch and sucrose metabolism	-1.7869		Pyrimidine synthesis	5.07063		Oxidative phosphorylation	12.6126
Glyoxylate and dicarboxylate metabolism	-1.92702		Citric acid cycle	4.93795		CoA catabolism	12.2417
Tryptophan metabolism	-1.95144		N-glycan synthesis	4.72135		Cysteine Metabolism	11.2845
N-glycan synthesis	-1.96848		beta-Alanine metabolism	4.66543		NAD metabolism	11.1457
Miscellaneous	-2.20691		Fatty acid synthesis	4.65476		Fructose and mannose metabolism	11.0798
Biotin metabolism	-2.42308		Folate metabolism	3.62805		Glycerophospholipid metabolism	10.6046
Transport, lysosomal	-2.62159		Fatty acid oxidation	3.31167		Miscellaneous	9.17809
Folate metabolism	-2.78326		Pyrimidine catabolism	3.11964		Purine catabolism	9.13914
Cholesterol metabolism	-2.99525		Glyoxylate and dicarboxylate metabolism	2.95769		Cholesterol metabolism	8.78342
Transport, peroxisomal	-3.51254		Propanoate metabolism	2.8967		Triacylglycerol synthesis	8.73334
Steroid metabolism	-3.55322		Eicosanoid metabolism	2.61125		Fatty acid synthesis	8.68788
Phosphatidylinositol phosphate metabolism	-3.68685		Glycerophospholipid metabolism	2.60813		Pyrimidine catabolism	8.28155
Fatty acid synthesis	-4.03312		Purine catabolism	2.44052		Methionine and cysteine metabolism	7.39899
Tetrahydrobiopterin metabolism	-4.16695		Pentose phosphate pathway	2.34471		Histidine metabolism	7.16389
Sphingolipid metabolism	-4.32243		Phosphatidylinositol phosphate metabolism	2.33089		N-glycan synthesis	6.68983
Galactose metabolism	-4.38372		Biotin metabolism	2.19751		Folate metabolism	6.4113
Pyrimidine catabolism	-5.16191		Histidine metabolism	1.44764		Phosphatidylinositol phosphate metabolism	6.01774
Cytochrome metabolism	-5.50716		Tyrosine metabolism	0.780367		beta-Alanine metabolism	5.99499
Histidine metabolism	-5.71625		N-glycan degradation	0.742637		Vitamin B2 metabolism	5.6155
Arginine and Proline Metabolism	-5.82806		Methionine and cysteine metabolism	0.546659		Purine synthesis	5.35069
Glycine, serine, alanine and threonine metabolism	-6.02901		Tryptophan metabolism	0.173892		Glyoxylate and dicarboxylate metabolism	4.88472
Oxidative phosphorylation	-6.21339		Keratan sulfate degradation	0.147208		Biotin metabolism	4.62058
Urea cycle	-6.30566		Keratan sulfate synthesis	3.99775e-30		Aminosugar metabolism	4.11404
Aminosugar metabolism	-6.30955		Transport, golgi apparatus	8.50615e-44		Propanoate metabolism	4.10229
Purine catabolism	-6.69862		Glycosphingolipid metabolism	2.22418e-44		Eicosanoid metabolism	3.41179
Exchange	-6.81678		Taurine and hypotaurine metabolism	7.51706e-51		Tryptophan metabolism	2.12533
Methionine and cysteine metabolism	-6.85234		O-glycan synthesis	7.29097e-51		N-glycan degradation	1.91103
Glycerophospholipid metabolism	-7.99645		Chondroitin sulfate degradation	0		Sphingolipid metabolism	1.70726
Butanoate metabolism	-8.33682		Heparan sulfate degradation	0		Tyrosine metabolism	1.34922
Exchange/demand reaction	-8.34526		Vitamin B6 metabolism	0		Starch and sucrose metabolism	1.03017
Nucleotide interconversion	-8.34777		D-alanine metabolism	0		Cytochrome metabolism	0.476797
Transport, extracellular	-8.59177		Thiamine metabolism	0		Keratan sulfate degradation	0.307039
Vitamin A metabolism	-8.7376		Arachidonic acid metabolism	0		O-glycan synthesis	2.46463e-28
ROS detoxification	-8.80928		Heme synthesis	0		Keratan sulfate synthesis	7.86117e-29
Transport, endoplasmic reticular	-8.87983		Lysine metabolism	0		Transport, golgi apparatus	3.97019e-29
Valine, leucine, and isoleucine metabolism	-9.03448		Xenobiotics metabolism	0		Chondroitin sulfate degradation	2.78027e-29
Citric acid cycle	-9.04599		Ubiquinone synthesis	0		Taurine and hypotaurine metabolism	2.46791e-50
Squalene and cholesterol synthesis	-9.27187		Selenoamino acid metabolism	0		Heparan sulfate degradation	0
Glutamate metabolism	-9.41548		Nucleotide sugar metabolism	0		Vitamin B6 metabolism	0
Fatty acid oxidation	-9.53195		Linoleate metabolism	0		D-alanine metabolism	0
Transport, nuclear	-10.0747		Limonene and pinene degradation	0		Thiamine metabolism	0
Pyruvate metabolism	-10.7868		Heme degradation	0		Arachidonic acid metabolism	0
Transport, mitochondrial	-11.0955		Chondroitin synthesis	0		Heme synthesis	0
Cysteine Metabolism	-11.2845		Blood group synthesis	0		Lysine metabolism	0
Triacylglycerol synthesis	-11.5641		Androgen and estrogen synthesis and metabolism	0		Xenobiotics metabolism	0
Glycolysis/gluconeogenesis	-11.883		Alkaloid synthesis	0		Ubiquinone synthesis	0
NAD metabolism	-12.9185		Phenylalanine metabolism	0		Selenoamino acid metabolism	0
Pyrimidine synthesis	-14.477		Cysteine Metabolism	-4.39251e-42		Nucleotide sugar metabolism	0
Pentose phosphate pathway	-15.9175		Starch and sucrose metabolism	-0.756726		Linoleate metabolism	0
Alanine and aspartate metabolism	-16.4398		Glutathione metabolism	-1.18242		Limonene and pinene degradation	0
Glutathione metabolism	-17.4807		NAD metabolism	-1.77284		Heme degradation	0
C5-branched dibasic acid metabolism	-18.9391		Aminosugar metabolism	-2.19551		Chondroitin synthesis	0
Vitamin B2 metabolism	-20.0492		Sphingolipid metabolism	-2.61516		Blood group synthesis	0
Hyaluronan metabolism	-21.6677		Triacylglycerol synthesis	-2.83077		Androgen and estrogen synthesis and metabolism	0
Unassigned	-24.5499		Steroid metabolism	-4.10229		Alkaloid synthesis	0
Glycosphingolipid metabolism	-28.5604		Cytochrome metabolism	-5.03036		Phenylalanine metabolism	0
Vitamin D metabolism	-29.7562		Nucleotide salvage pathway	-6.63662		Steroid metabolism	-0.54907
CoA synthesis	-32.028		Vitamin B2 metabolism	-14.4337		Nucleotide salvage pathway	-4.95426

## Sheet: PathABSdifferences
Pathways	21 - 2249		Pathways	21-50		Pathways	2249-50
CoA synthesis	32.028		Vitamin D metabolism	49.745		Vitamin D metabolism	79.5012
Vitamin D metabolism	29.7562		Squalene and cholesterol synthesis	34.2896		CoA synthesis	48.3672
Glycosphingolipid metabolism	28.5604		CoA catabolism	30.0559		Squalene and cholesterol synthesis	43.5614
Unassigned	24.5499		Glycine, serine, alanine and threonine metabolism	25.7663		Hyaluronan metabolism	40.5584
Hyaluronan metabolism	21.6677		Vitamin C metabolism	24.7182		Unassigned	33.3993
Vitamin B2 metabolism	20.0492		Vitamin A metabolism	21.6622		Glycine, serine, alanine and threonine metabolism	31.7953
C5-branched dibasic acid metabolism	18.9391		R group synthesis	19.9187		Vitamin A metabolism	30.3998
CoA catabolism	17.8142		Urea cycle	18.9655		Glycosphingolipid metabolism	28.5604
Glutathione metabolism	17.4807		Hyaluronan metabolism	18.8906		Pyruvate metabolism	26.6652
Alanine and aspartate metabolism	16.4398		Transport, peroxisomal	16.9711		C5-branched dibasic acid metabolism	25.2753
Pentose phosphate pathway	15.9175		CoA synthesis	16.3391		Urea cycle	25.2711
Pyrimidine synthesis	14.477		Galactose metabolism	16.1012		Valine, leucine, and isoleucine metabolism	24.7634
NAD metabolism	12.9185		Pyruvate metabolism	15.8783		Vitamin C metabolism	24.6659
Glycolysis/gluconeogenesis	11.883		Valine, leucine, and isoleucine metabolism	15.729		Alanine and aspartate metabolism	23.0166
Triacylglycerol synthesis	11.5641		Arginine and Proline Metabolism	15.5848		ROS detoxification	23.0063
Cysteine Metabolism	11.2845		Tetrahydrobiopterin metabolism	15.3027		Arginine and Proline Metabolism	21.4129
Transport, mitochondrial	11.0955		Vitamin B2 metabolism	14.4337		Glycolysis/gluconeogenesis	20.6306
Pyruvate metabolism	10.7868		ROS detoxification	14.1971		Galactose metabolism	20.4849
Transport, nuclear	10.0747		Inositol phosphate metabolism	12.3421		Transport, peroxisomal	20.4836
Fatty acid oxidation	9.53195		Transport, lysosomal	11.7134		Transport, endoplasmic reticular	20.0885
Glutamate metabolism	9.41548		Transport, endoplasmic reticular	11.2087		Pyrimidine synthesis	19.5476
Squalene and cholesterol synthesis	9.27187		Fructose and mannose metabolism	10.8976		Tetrahydrobiopterin metabolism	19.4696
Citric acid cycle	9.04599		Exchange/demand reaction	8.93253		Pentose phosphate pathway	18.2622
Valine, leucine, and isoleucine metabolism	9.03448		Unassigned	8.84943		Exchange/demand reaction	17.2778
Transport, endoplasmic reticular	8.87983		Glycolysis/gluconeogenesis	8.74756		Transport, mitochondrial	17.1596
ROS detoxification	8.80928		Purine synthesis	7.56022		Glutamate metabolism	16.7518
Vitamin A metabolism	8.7376		Glutamate metabolism	7.33633		Glutathione metabolism	16.2982
Transport, extracellular	8.59177		Butanoate metabolism	7.17631		Transport, nuclear	16.2837
Nucleotide interconversion	8.34777		Miscellaneous	6.97118		Butanoate metabolism	15.5131
Exchange/demand reaction	8.34526		Nucleotide salvage pathway	6.63662		R group synthesis	15.0141
Butanoate metabolism	8.33682		Alanine and aspartate metabolism	6.5768		Nucleotide interconversion	14.9073
Glycerophospholipid metabolism	7.99645		Nucleotide interconversion	6.55958		Transport, lysosomal	14.335
Methionine and cysteine metabolism	6.85234		Oxidative phosphorylation	6.39925		Citric acid cycle	13.9839
Exchange	6.81678		C5-branched dibasic acid metabolism	6.33626		Transport, extracellular	13.9789
Purine catabolism	6.69862		Exchange	6.21237		Inositol phosphate metabolism	13.6673
Aminosugar metabolism	6.30955		Transport, nuclear	6.20902		Exchange	13.0291
Urea cycle	6.30566		Transport, mitochondrial	6.06418		Fatty acid oxidation	12.8436
Oxidative phosphorylation	6.21339		Cholesterol metabolism	5.78817		Oxidative phosphorylation	12.6126
Glycine, serine, alanine and threonine metabolism	6.02901		Transport, extracellular	5.38711		CoA catabolism	12.2417
Arginine and Proline Metabolism	5.82806		Pyrimidine synthesis	5.07063		Cysteine Metabolism	11.2845
Histidine metabolism	5.71625		Cytochrome metabolism	5.03036		NAD metabolism	11.1457
Cytochrome metabolism	5.50716		Citric acid cycle	4.93795		Fructose and mannose metabolism	11.0798
Pyrimidine catabolism	5.16191		N-glycan synthesis	4.72135		Glycerophospholipid metabolism	10.6046
R group synthesis	4.90468		beta-Alanine metabolism	4.66543		Miscellaneous	9.17809
Galactose metabolism	4.38372		Fatty acid synthesis	4.65476		Purine catabolism	9.13914
Sphingolipid metabolism	4.32243		Steroid metabolism	4.10229		Cholesterol metabolism	8.78342
Tetrahydrobiopterin metabolism	4.16695		Folate metabolism	3.62805		Triacylglycerol synthesis	8.73334
Fatty acid synthesis	4.03312		Fatty acid oxidation	3.31167		Fatty acid synthesis	8.68788
Phosphatidylinositol phosphate metabolism	3.68685		Pyrimidine catabolism	3.11964		Pyrimidine catabolism	8.28155
Steroid metabolism	3.55322		Glyoxylate and dicarboxylate metabolism	2.95769		Methionine and cysteine metabolism	7.39899
Transport, peroxisomal	3.51254		Propanoate metabolism	2.8967		Histidine metabolism	7.16389
Cholesterol metabolism	2.99525		Triacylglycerol synthesis	2.83077		N-glycan synthesis	6.68983
Folate metabolism	2.78326		Sphingolipid metabolism	2.61516		Folate metabolism	6.4113
Transport, lysosomal	2.62159		Eicosanoid metabolism	2.61125		Phosphatidylinositol phosphate metabolism	6.01774
Biotin metabolism	2.42308		Glycerophospholipid metabolism	2.60813		beta-Alanine metabolism	5.99499
Purine synthesis	2.20954		Purine catabolism	2.44052		Vitamin B2 metabolism	5.6155
Miscellaneous	2.20691		Pentose phosphate pathway	2.34471		Purine synthesis	5.35069
N-glycan synthesis	1.96848		Phosphatidylinositol phosphate metabolism	2.33089		Nucleotide salvage pathway	4.95426
Tryptophan metabolism	1.95144		Biotin metabolism	2.19751		Glyoxylate and dicarboxylate metabolism	4.88472
Glyoxylate and dicarboxylate metabolism	1.92702		Aminosugar metabolism	2.19551		Biotin metabolism	4.62058
Starch and sucrose metabolism	1.7869		NAD metabolism	1.77284		Aminosugar metabolism	4.11404
Nucleotide salvage pathway	1.68236		Histidine metabolism	1.44764		Propanoate metabolism	4.10229
beta-Alanine metabolism	1.32956		Glutathione metabolism	1.18242		Eicosanoid metabolism	3.41179
Inositol phosphate metabolism	1.3252		Tyrosine metabolism	0.780367		Tryptophan metabolism	2.12533
Propanoate metabolism	1.20559		Starch and sucrose metabolism	0.756726		N-glycan degradation	1.91103
N-glycan degradation	1.16839		N-glycan degradation	0.742637		Sphingolipid metabolism	1.70726
Eicosanoid metabolism	0.80054		Methionine and cysteine metabolism	0.546659		Tyrosine metabolism	1.34922
Tyrosine metabolism	0.568849		Tryptophan metabolism	0.173892		Starch and sucrose metabolism	1.03017
Fructose and mannose metabolism	0.182241		Keratan sulfate degradation	0.147208		Steroid metabolism	0.54907
Keratan sulfate degradation	0.15983		Keratan sulfate synthesis	3.99775e-30		Cytochrome metabolism	0.476797
Vitamin C metabolism	0.0522904		Cysteine Metabolism	4.39251e-42		Keratan sulfate degradation	0.307039
O-glycan synthesis	2.46463e-28		Transport, golgi apparatus	8.50615e-44		O-glycan synthesis	2.46463e-28
Keratan sulfate synthesis	7.46139e-29		Glycosphingolipid metabolism	2.22418e-44		Keratan sulfate synthesis	7.86117e-29
Transport, golgi apparatus	3.97019e-29		Taurine and hypotaurine metabolism	7.51706e-51		Transport, golgi apparatus	3.97019e-29
Chondroitin sulfate degradation	2.78027e-29		O-glycan synthesis	7.29097e-51		Chondroitin sulfate degradation	2.78027e-29
Taurine and hypotaurine metabolism	1.7162e-50		Chondroitin sulfate degradation	0		Taurine and hypotaurine metabolism	2.46791e-50
Heparan sulfate degradation	0		Heparan sulfate degradation	0		Heparan sulfate degradation	0
Vitamin B6 metabolism	0		Vitamin B6 metabolism	0		Vitamin B6 metabolism	0
D-alanine metabolism	0		D-alanine metabolism	0		D-alanine metabolism	0
Thiamine metabolism	0		Thiamine metabolism	0		Thiamine metabolism	0
Arachidonic acid metabolism	0		Arachidonic acid metabolism	0		Arachidonic acid metabolism	0
Heme synthesis	0		Heme synthesis	0		Heme synthesis	0
Lysine metabolism	0		Lysine metabolism	0		Lysine metabolism	0
Xenobiotics metabolism	0		Xenobiotics metabolism	0		Xenobiotics metabolism	0
Ubiquinone synthesis	0		Ubiquinone synthesis	0		Ubiquinone synthesis	0
Selenoamino acid metabolism	0		Selenoamino acid metabolism	0		Selenoamino acid metabolism	0
Nucleotide sugar metabolism	0		Nucleotide sugar metabolism	0		Nucleotide sugar metabolism	0
Linoleate metabolism	0		Linoleate metabolism	0		Linoleate metabolism	0
Limonene and pinene degradation	0		Limonene and pinene degradation	0		Limonene and pinene degradation	0
Heme degradation	0		Heme degradation	0		Heme degradation	0
Chondroitin synthesis	0		Chondroitin synthesis	0		Chondroitin synthesis	0
Blood group synthesis	0		Blood group synthesis	0		Blood group synthesis	0
Androgen and estrogen synthesis and metabolism	0		Androgen and estrogen synthesis and metabolism	0		Androgen and estrogen synthesis and metabolism	0
Alkaloid synthesis	0		Alkaloid synthesis	0		Alkaloid synthesis	0
Phenylalanine metabolism	0		Phenylalanine metabolism	0		Phenylalanine metabolism	0
Average Difference	6.13665			6.60289			11.4546
